# Supplementary material for: Mechanism of cationic ring-opening polymerisation of ε-caprolactone using metallocene/borate catalytic systems: a DFT and NCI study on chain initiation, propagation and termination
Source: Royal Society of Chemistry journal article supplement (doi:10.1039/d4ra01178c), 2024-01-01
Supplement: d4ra01178c1.pdf [file d4ra01178c1.pdf]

## Electronic Supplementary Information

### Mechanism of cationic ring-opening polymerisation of $\epsilon$ -caprolactone using metallocene/borate catalytic systems: a DFT and NCI study on chain initiation, propagation and termination

Wijitra Meelua,<sup>ab</sup> Mikko Linnolahti <sup>c</sup> and Jitrayut Jittonom<sup>\*b</sup>

<sup>a</sup> *Demonstration School, University of Phayao, Phayao 56000, Thailand*

<sup>b</sup> *Unit of Excellence in Computational Molecular Science and Catalysis, and Division of Chemistry, School of Science, University of Phayao, Phayao 56000, Thailand*

<sup>c</sup> *Department of Chemistry, University of Eastern Finland Joensuu Campus, Yliopistokatu 7, FI-80100 Joensuu, Finland*

E-mail: [jitrayut.018@gmail.com](mailto:jitrayut.018@gmail.com), [jitrayut.ji@up.ac.th](mailto:jitrayut.ji@up.ac.th)

### Table of Content

|                                                                                                                                                   | <b>Pages</b> |
|---------------------------------------------------------------------------------------------------------------------------------------------------|--------------|
| I. Energy profiles from different energy correction schemes                                                                                       | S2           |
| II. A benchmark for the chosen method in reaction barrier prediction                                                                              | S4           |
| III. Conformational analysis of CL monomer and counteranions                                                                                      | S6           |
| IV. Charge analysis of ligands, monomer (CL), functional groups in the <b>Free species</b> , <b>Complex</b> , <b>R1</b> and <b>TS1</b> structures | S10          |
| V. Effect of metal: Hf vs Zr                                                                                                                      | S12          |
| VI. Effect of solvent on the HOMO-LUMO energies                                                                                                   | S15          |
| VII. Observed planes on the stationary points for the naked model                                                                                 | S18          |
| VIII. Additional data from NCI analysis                                                                                                           | S19          |
| IX. References                                                                                                                                    | S26          |
| X. XYZ coordinates for all optimised species                                                                                                      | S27          |

## I. Energy profiles from different energy correction schemes

**Table S1.** Results of energy correction scheme II based on the suggested procedure of Gupta et al.<sup>1</sup> Corrections in thermodynamic energies (zero-point energy: ZPE, enthalpy: H, and Gibbs free energy, G) for the reactants of steps (**Complex**→**R1**, **P1**→**R2**, and **P2**→**R3**) calculated using B3LYP and B3LYP-D3(BJ) functional methods for systems **C<sup>+</sup>**, **1** and **2**.<sup>a</sup>

| Systems                    | B3LYP        |            |                            | B3LYP-D3(BJ) |            |            |
|----------------------------|--------------|------------|----------------------------|--------------|------------|------------|
|                            | $\Delta ZPE$ | $\Delta H$ | $\Delta G$                 | $\Delta ZPE$ | $\Delta H$ | $\Delta G$ |
| <b>Complex</b> → <b>R1</b> |              |            |                            |              |            |            |
| <b>2</b>                   | -31.7        | -24.2      | -35.6 (-63.7) <sup>b</sup> | -78.3        | -70.8      | -82.2      |
| <b>1</b>                   | -32.4        | -29.1      | -26.6 (-53.8) <sup>b</sup> | -63.5        | -60.1      | -57.7      |
| <b>C<sup>+</sup></b>       | -20.7        | -21.2      | -12.4 (-41.0) <sup>b</sup> | -29.9        | -30.5      | -21.6      |
| <b>P1</b> → <b>R2</b>      |              |            |                            |              |            |            |
| <b>2</b>                   | -34.8        | -29.3      | -34.1 (-58.6) <sup>b</sup> | -71.0        | -65.5      | -70.3      |
| <b>1</b>                   | -34.1        | -33.4      | -18.8 (-56.5) <sup>b</sup> | -65.3        | -64.6      | -50.1      |
| <b>C<sup>+</sup></b>       | -24.0        | -22.6      | -20.2 (-59.8) <sup>b</sup> | -36.0        | -34.5      | -32.2      |
| <b>P2</b> → <b>R3</b>      |              |            |                            |              |            |            |
| <b>2</b>                   | -31.9        | -28.6      | -23.9 (-50.1) <sup>b</sup> | -57.0        | -53.8      | -49.0      |
| <b>1</b>                   | -32.4        | -26.7      | -33.2 (-57.0) <sup>b</sup> | -65.2        | -59.5      | -66.0      |
| <b>C<sup>+</sup></b>       | -24.5        | -20.7      | -26.6 (-48.3) <sup>b</sup> | -36.4        | -32.5      | -38.5      |

<sup>a</sup> Values were obtained based on the toluene-optimised geometries at the B3LYP(SMD, toluene)/LANL2DZ+6-31G(d) and B3LYP-D3(BJ)(SMD, toluene)/LANL2DZ+6-31G(d) levels of theory. <sup>b</sup> Values in parenthesis were  $\Delta G$  obtained from the gas-phase optimised geometries at the B3LYP/LANL2DZ+6-31G(d) level of theory

### a) Energy correction I

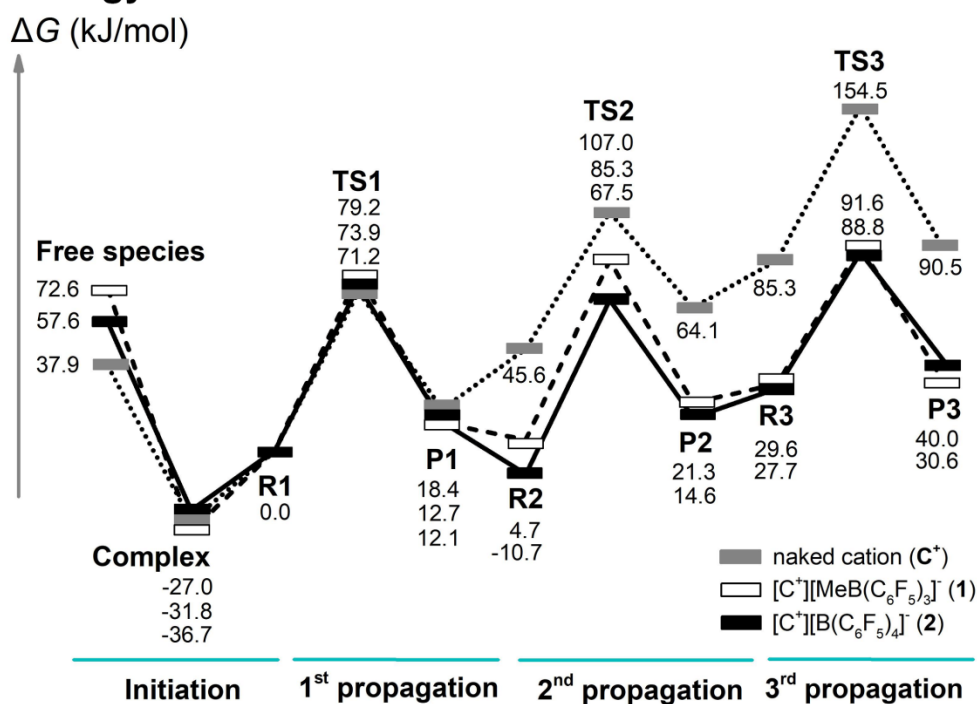

### b) Energy correction II

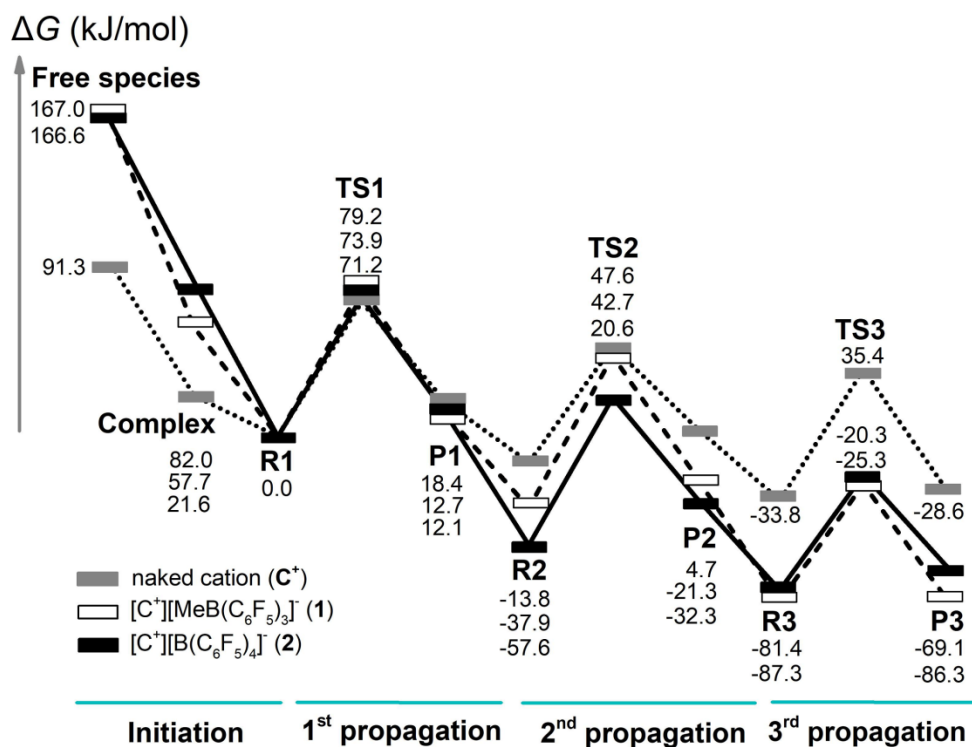

**Figure S1.** Gibbs free energy profiles resulting from the two energetic correction schemes I (a) and II (b). All energies were obtained at the B3LYP-D3(BJ)(SMD, toluene)/LANL2DZ, 6-31G(d) level of theory and were relative to the energy of **R1** (set to 0.0).

## II. A benchmark for the chosen method in reaction barrier prediction

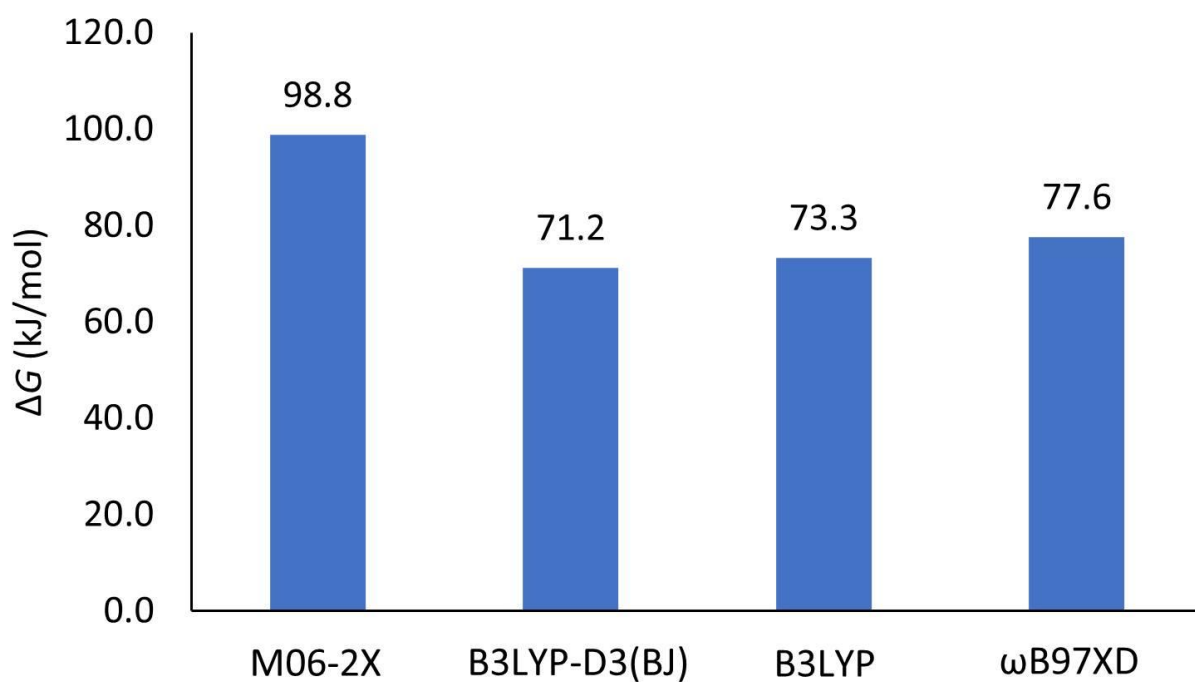

**Figure S2.** Bar chart showing the values of computed reaction barriers ( $\Delta G^{\ddagger}_{Ea1}$ ) for the 1<sup>st</sup> propagation, as obtained in toluene using different DFT/LANL2DZ+6-31G(d) methods (DFT = M06-2X, B3LYP-D3(BJ), B3LYP, and  $\omega$ B97XD) based on the naked model ( $C^+$ ).

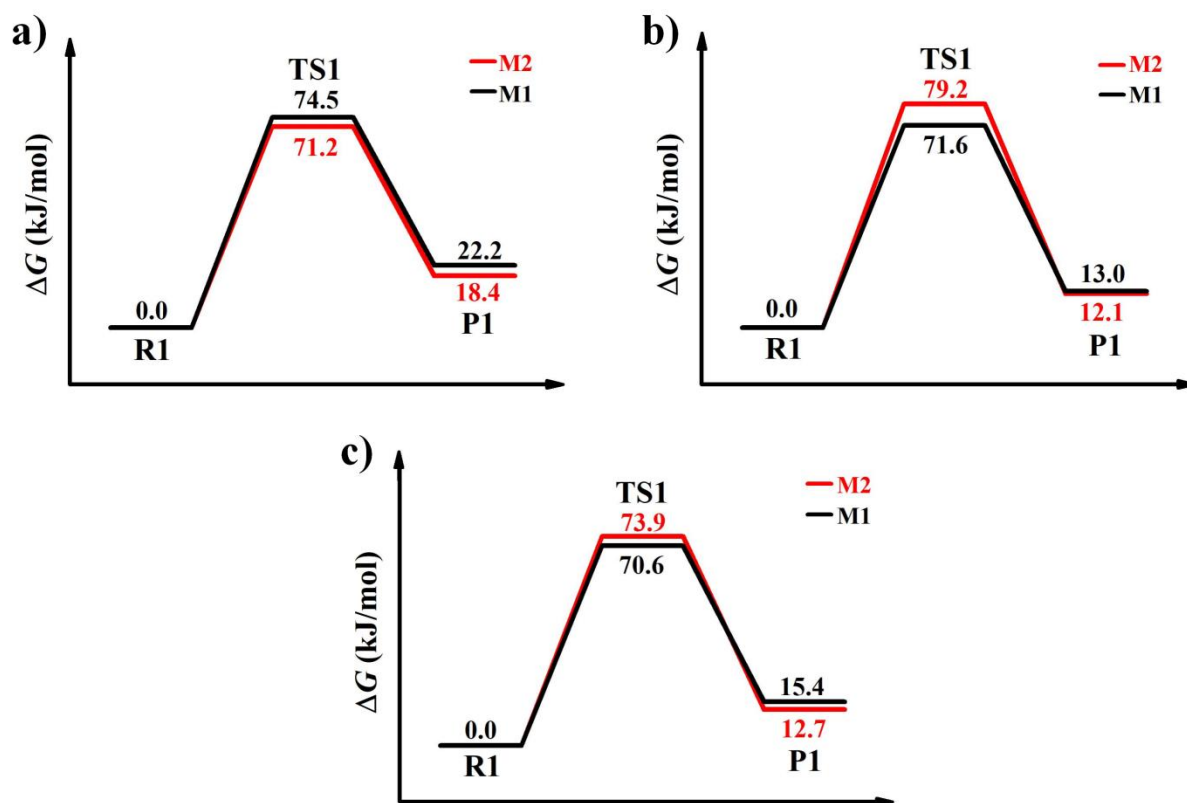

**Figure S3.** Comparison of solution-phase Gibbs energy profiles (kJ/mol) on the 1<sup>st</sup> propagation step (R1, TS1 and P1) for the  $C^+$  (a), **1** (b), and **2** (c) systems, as obtained at the B3LYP-D3(BJ)(SMD, toluene)/LANL2DZ, 6-311++G(d,p) (labelled as **M1**) and the B3LYP-D3(BJ)(SMD, toluene)/LANL2DZ, 6-31G(d) levels (labelled as **M2**). Solution Gibbs energies are obtained using single-point energy calculation with SMD model (toluene,  $\epsilon = 2.3741$ ).

### III. Conformational analysis of CL monomer and counteranions

A conformational analysis was conducted to obtain the most stable configurations for the ion-pair model systems, as in a previous study of Sc complexes.<sup>2</sup> In particular, different arrangements of CL monomer around the Zr center were tested (Figure S4). The effect of the conformation of the counteranions ( $[\text{MeB}(\text{C}_6\text{F}_5)_3]^-$  and  $[\text{B}(\text{C}_6\text{F}_5)_4]^-$ ) were evaluated (Figures S5 and S6).

In Figure S4, two possible conformations, i.e., *front* and *side* conformers in Figure S4(a), could be envisioned after the insertion of CL monomer into the metal center of zirconocene catalyst (see also Scheme 2). Our relaxed potential energy scan shown in Figure S4(b) suggested that the **Complex** structure is more stable in their *side* conformations, similar to the case of trimethylene carbonate polymerization reported by our group.<sup>3</sup> In particular, the *side* conformer is 3.5 kJ/mol more stable than its *front* conformer, and the energy barriers via  $\text{TS}_{\text{side/front}}$  between the two conformers are calculated to be ~9, 12, and 22 kJ/mol for E, H, and G, respectively (Figure S4(c)). Thus, there is a significant entropic effect (~10 kJ/mol) for the interchange between the two conformations.

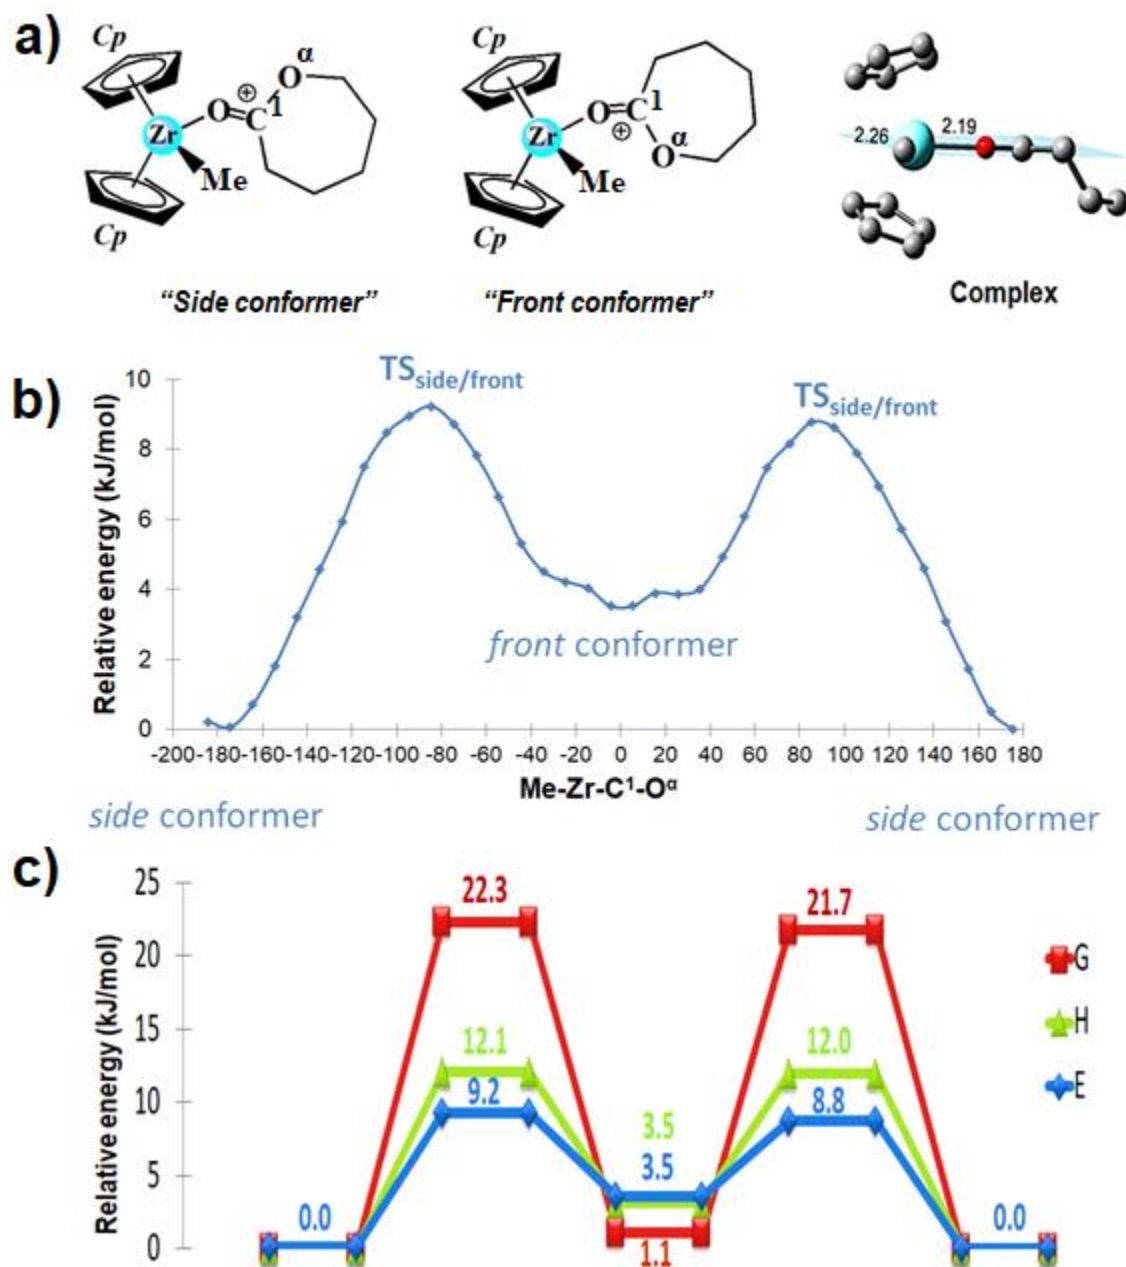

**Figure S4.** Relaxed potential energy scan as a function of the dihedral angle, Me-Zr-C<sup>1</sup>-O<sup>α</sup>, for **Complex** structure in different thermodynamic values in unit of kJ/mol (Gibbs free energy; G, enthalpy; H, and energy; E).

**Zirconocene/cocatalyst models.** To model the  $[\text{Cp}_2\text{ZrMe}^+][\text{A}^-]$  system ( $\text{A}^- = [\text{MeB}(\text{C}_6\text{F}_5)_3]^-$  and  $[\text{B}(\text{C}_6\text{F}_5)_4]^-$ ), we first obtain the most stable geometry of the  $[\text{Cp}_2\text{ZrMe-CL}]^+$  structure from the conformational analysis, i.e., the *side* conformer of CL coordination, as in our previous study on the CROP of trimethylene carbonate.<sup>3</sup> Beginning with this *side* conformation (**Complex**, Scheme 3), we added the counteranion and placed it freely in various positions around the metal center of the catalyst and found that, after the geometry optimization without restraints (at B3LYP/LANL2DZ+6-31G(d) level), three different stable positions of the anion (see positions 1-3 in Figures S5-S6) were located. We then optimised the remaining species (**R1**, **TS1** and **P1**) following the positions 1-3. Free energies of the species (i.e., **Complex**  $\rightarrow$  **P1**) were generated using an energy correction scheme where the complex was treated in the vicinity of each other and all energies were relative to the energy of reactant **R1**. The results in Figures S5-S6 clearly indicate that, among different positions of cocatalyst, “position 1” where the anion locating close to the ring cleavage site yields the most preferred pathway, with relatively stable complexes (+12.1 and +12.7 kJ/mol) and the lowest Gibbs energy barriers (79.2 and 73.9 kJ/mol) in both **1** and **2** systems, respectively.

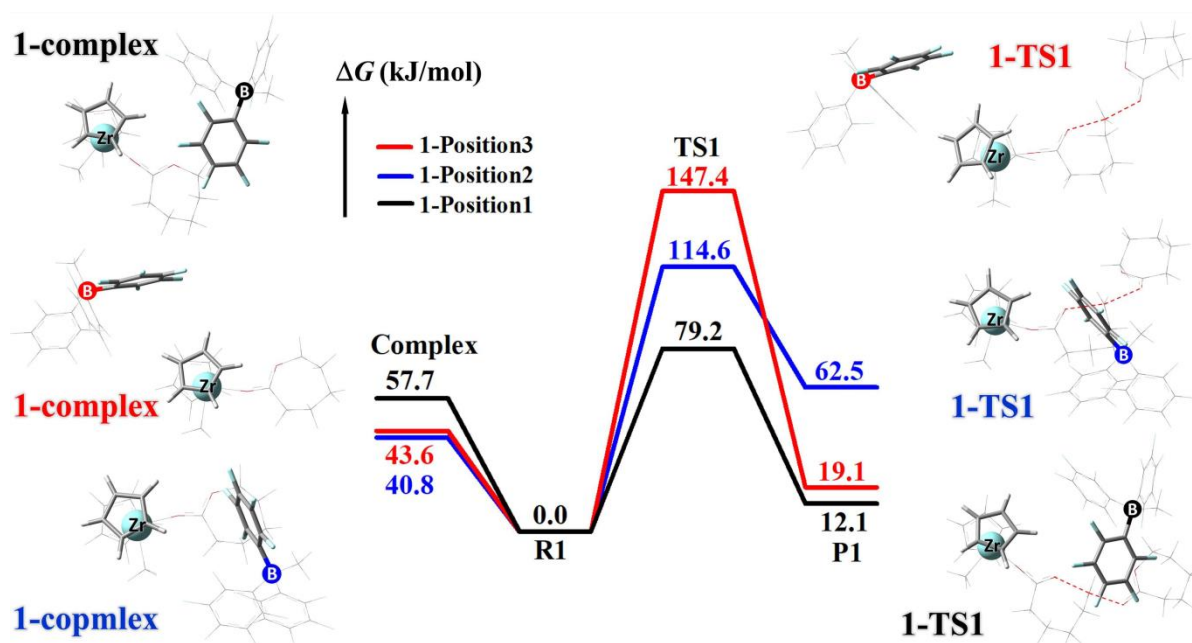

**Figure S5.** Relative Gibbs energies of the catalytic species (**Complex**  $\rightarrow$  **P1**) where the  $[\text{MeB}(\text{C}_6\text{F}_5)_3]^-$  (**1**) counteranion was stably located in three different positions (1-3) around the catalytic Zr centre. Note that positions 1-2 corresponds to the terms “*side\_up*” and “*side\_down*” discussed in the main text, respectively. Since the relative barrier for position 3 is obviously high compared to the other conformations (positions 1 and 2), we thus discard this possibility and excluded it from the main text.



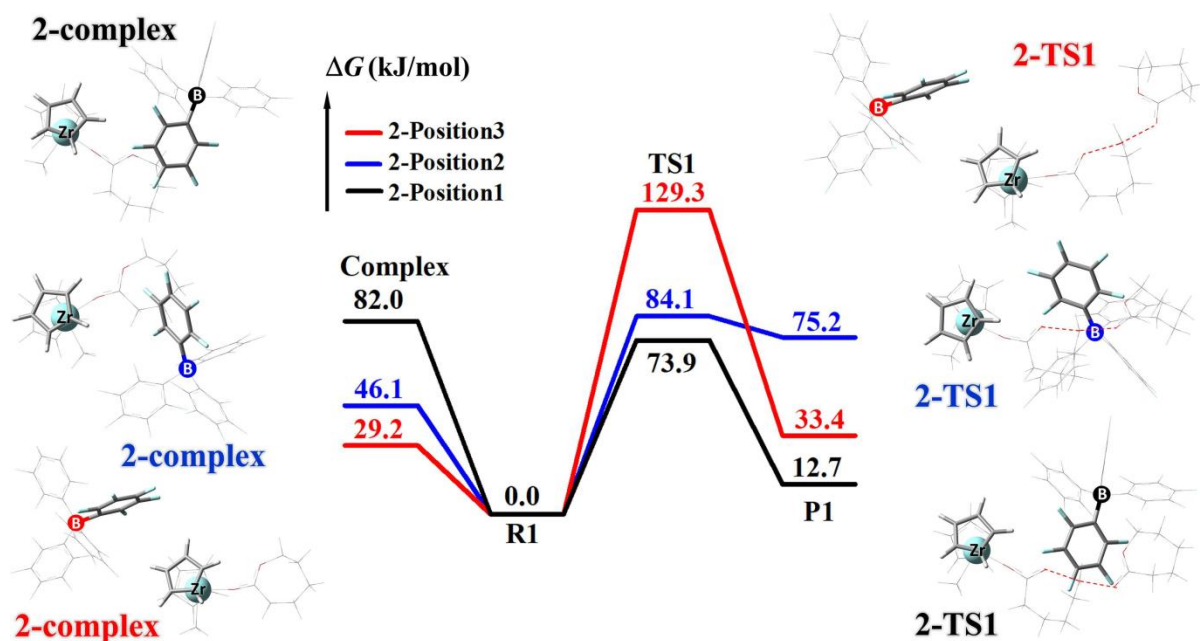

**Figure S6.** Relative Gibbs energies of the catalytic species (**Complex**  $\rightarrow$  **P1**) where the  $[B(C_6F_5)_4]^-$  (**2**) counteranion was stably located in three different positions (1-3) around the catalytic Zr centre. Note that positions 1-2 corresponds to the terms “*side\_up* and *side\_down*” discussed in the main text, respectively. Since the relative barrier for position 3 is obviously high compared to the other conformations (positions 1 and 2), we thus discard this possibility and excluded it from the main text.

#### IV. Charge analysis of ligands, monomer (CL), functional groups in the Free species, Complex, R1 and TS1 structure

**Table S2.** Charge analysis (Hirshfeld, Mulliken, NBO; in unit of  $e$ ) of ligands, monomer (CL), functional groups for the anion cocatalysts,  $\text{MeB}(\text{C}_6\text{F}_5)_3^-$  and  $\text{B}(\text{C}_6\text{F}_5)_4^-$  in isolated species.<sup>a</sup> Figures below represent the **Complex** species, which are used to indicate the atomic definitions used for charge analysis.

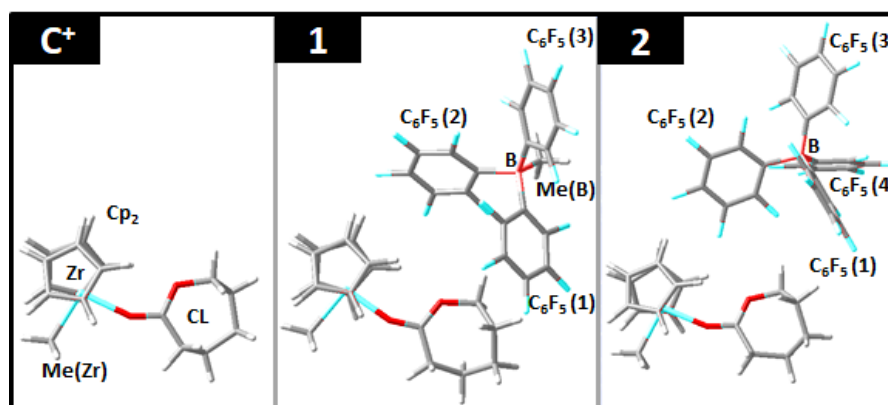

| Atom                   | $\text{MeB}(\text{C}_6\text{F}_5)_3^-$ |          |        | Atom                   | $\text{B}(\text{C}_6\text{F}_5)_4^-$ |          |        |
|------------------------|----------------------------------------|----------|--------|------------------------|--------------------------------------|----------|--------|
|                        | Hirshfeld                              | Mulliken | NBO    |                        | Hirshfeld                            | Mulliken | NBO    |
| B                      | 0.032                                  | 0.400    | 0.394  | B                      | 0.039                                | 0.407    | 0.382  |
| $\text{C}_6\text{F}_5$ | -0.281                                 | -0.377   | -0.378 | $\text{C}_6\text{F}_5$ | -0.260                               | -0.352   | -0.346 |
| $\text{C}_6\text{F}_5$ | -0.288                                 | -0.377   | -0.384 | $\text{C}_6\text{F}_5$ | -0.260                               | -0.351   | -0.345 |
| $\text{C}_6\text{F}_5$ | -0.278                                 | -0.364   | -0.376 | $\text{C}_6\text{F}_5$ | -0.260                               | -0.352   | -0.346 |
| Me(B)                  | -0.186                                 | -0.282   | -0.256 | $\text{C}_6\text{F}_5$ | -0.260                               | -0.352   | -0.346 |

<sup>a</sup> A total charge is -1 for each anion cocatalyst, as obtained with the gas-phase calculations at the B3LYP/LANL2DZ+6-31G(d) level of theory

**Table S3.** Charge analysis (Hirshfeld, Mulliken, NBO; in unit of  $e$ ) of ligands, monomer (CL), functional groups in the intermediates (**Complex, R1, TS1**) for different catalytic systems [naked cation,  $C^+$ ,  $[C^+][MeB(C_6F_5)_3]^-$  (**1**), and  $[C^+][B(C_6F_5)_4]^-$  (**2**)]. Values were computed with the gas-phase calculations at the B3LYP/LANL2DZ+6-31G(d) level of theory

| Atom/<br>Group  | $C^+$ -Complex |          |        | Atom/<br>Group                    | 1-Complex |          |        | Atom/<br>Group                    | 2-Complex |          |        |
|-----------------|----------------|----------|--------|-----------------------------------|-----------|----------|--------|-----------------------------------|-----------|----------|--------|
|                 | Hirshfeld      | Mulliken | NBO    |                                   | Hirshfeld | Mulliken | NBO    |                                   | Hirshfeld | Mulliken | NBO    |
| Cp <sub>2</sub> | 0.230          | 0.107    | -0.252 | Cp <sub>2</sub>                   | 0.141     | 0.031    | -0.283 | Cp <sub>2</sub>                   | 0.139     | 0.026    | -0.291 |
| Zr              | 0.509          | 0.800    | 1.293  | Zr                                | 0.508     | 0.803    | 1.305  | Zr                                | 0.507     | 0.803    | 1.307  |
| Me(Zr)          | -0.158         | -0.173   | -0.343 | Me(Zr)                            | -0.185    | -0.202   | -0.368 | Me(Zr)                            | -0.183    | -0.197   | -0.366 |
| CL              | 0.417          | 0.266    | 0.302  | CL                                | 0.380     | 0.231    | 0.298  | CL                                | 0.385     | 0.226    | 0.296  |
|                 |                |          |        | B                                 | 0.033     | 0.391    | 0.401  | B                                 | 0.039     | 0.403    | 0.391  |
|                 |                |          |        | C <sub>6</sub> F <sub>5</sub> (1) | -0.253    | -0.354   | -0.379 | C <sub>6</sub> F <sub>5</sub> (1) | -0.241    | -0.338   | -0.344 |
|                 |                |          |        | C <sub>6</sub> F <sub>5</sub> (2) | -0.201    | -0.313   | -0.365 | C <sub>6</sub> F <sub>5</sub> (2) | -0.175    | -0.281   | -0.327 |
|                 |                |          |        | C <sub>6</sub> F <sub>5</sub> (3) | -0.251    | -0.328   | -0.362 | C <sub>6</sub> F <sub>5</sub> (3) | -0.230    | -0.312   | -0.328 |
|                 |                |          |        | Me(B)                             | -0.174    | -0.259   | -0.247 | C <sub>6</sub> F <sub>5</sub> (4) | -0.244    | -0.330   | -0.337 |

  

| Atom/<br>Group  | $C^+$ -R1 |          |        | Atom/<br>Group                    | 1-R1      |          |        | Atom/<br>Group                    | 2-R1      |          |        |
|-----------------|-----------|----------|--------|-----------------------------------|-----------|----------|--------|-----------------------------------|-----------|----------|--------|
|                 | Hirshfeld | Mulliken | NBO    |                                   | Hirshfeld | Mulliken | NBO    |                                   | Hirshfeld | Mulliken | NBO    |
| Cp <sub>2</sub> | 0.207     | 0.079    | -0.274 | Cp <sub>2</sub>                   | 0.129     | 0.013    | -0.296 | Cp <sub>2</sub>                   | 0.126     | 0.008    | -0.304 |
| Zr              | 0.510     | 0.812    | 1.303  | Zr                                | 0.510     | 0.809    | 1.309  | Zr                                | 0.509     | 0.810    | 1.312  |
| Me(Zr)          | -0.161    | -0.179   | -0.347 | Me(Zr)                            | -0.186    | -0.204   | -0.368 | Me(Zr)                            | -0.184    | -0.199   | -0.367 |
| CL-1            | 0.358     | 0.242    | 0.303  | CL-1                              | 0.308     | 0.204    | 0.294  | CL-1                              | 0.309     | 0.198    | 0.291  |
| CL-2            | 0.085     | 0.045    | 0.016  | CL-2                              | 0.023     | -0.007   | -0.003 | CL-2                              | -0.002    | -0.024   | -0.006 |
|                 |           |          |        | B                                 | 0.032     | 0.395    | 0.402  | B                                 | 0.039     | 0.403    | 0.391  |
|                 |           |          |        | C <sub>6</sub> F <sub>5</sub> (1) | -0.247    | -0.323   | -0.359 | C <sub>6</sub> F <sub>5</sub> (1) | -0.200    | -0.305   | -0.333 |
|                 |           |          |        | C <sub>6</sub> F <sub>5</sub> (2) | -0.209    | -0.315   | -0.365 | C <sub>6</sub> F <sub>5</sub> (2) | -0.167    | -0.271   | -0.321 |
|                 |           |          |        | C <sub>6</sub> F <sub>5</sub> (3) | -0.186    | -0.300   | -0.359 | C <sub>6</sub> F <sub>5</sub> (3) | -0.226    | -0.308   | -0.325 |
|                 |           |          |        | Me(B)                             | -0.186    | -0.204   | -0.368 | C <sub>6</sub> F <sub>5</sub> (4) | -0.208    | -0.313   | -0.338 |

  

| Atom/<br>Group  | $C^+$ -TS1 |          |        | Atom/<br>Group                    | 1-TS1     |          |        | Atom/<br>Group                    | 2-TS1     |          |        |
|-----------------|------------|----------|--------|-----------------------------------|-----------|----------|--------|-----------------------------------|-----------|----------|--------|
|                 | Hirshfeld  | Mulliken | NBO    |                                   | Hirshfeld | Mulliken | NBO    |                                   | Hirshfeld | Mulliken | NBO    |
| Cp <sub>2</sub> | 0.116      | -0.028   | -0.352 | Cp <sub>2</sub>                   | 0.048     | -0.084   | -0.366 | Cp <sub>2</sub>                   | 0.050     | -0.083   | -0.368 |
| Zr              | 0.509      | 0.835    | 1.328  | Zr                                | 0.508     | 0.826    | 1.327  | Zr                                | 0.508     | 0.829    | 1.331  |
| Me(Zr)          | -0.177     | -0.197   | -0.361 | Me(Zr)                            | -0.200    | -0.218   | -0.379 | Me(Zr)                            | -0.197    | -0.215   | -0.378 |
| CL-1            | 0.188      | 0.135    | 0.132  | CL-1                              | 0.184     | 0.133    | 0.153  | CL-1                              | 0.185     | 0.126    | 0.151  |
| CL-2            | 0.362      | 0.254    | 0.253  | CL-2                              | 0.256     | 0.174    | 0.208  | CL-2                              | 0.219     | 0.152    | 0.199  |
|                 |            |          |        | B                                 | 0.032     | 0.401    | 0.402  | B                                 | 0.039     | 0.405    | 0.391  |
|                 |            |          |        | C <sub>6</sub> F <sub>5</sub> (1) | -0.215    | -0.326   | -0.369 | C <sub>6</sub> F <sub>5</sub> (1) | -0.204    | -0.311   | -0.335 |
|                 |            |          |        | C <sub>6</sub> F <sub>5</sub> (2) | -0.188    | -0.297   | -0.357 | C <sub>6</sub> F <sub>5</sub> (2) | -0.168    | -0.270   | -0.323 |
|                 |            |          |        | C <sub>6</sub> F <sub>5</sub> (3) | -0.246    | -0.325   | -0.359 | C <sub>6</sub> F <sub>5</sub> (3) | -0.224    | -0.307   | -0.324 |
|                 |            |          |        | Me(B)                             | -0.181    | -0.284   | -0.260 | C <sub>6</sub> F <sub>5</sub> (4) | -0.212    | -0.326   | -0.344 |

## V. Effect of metal: Hf vs Zr

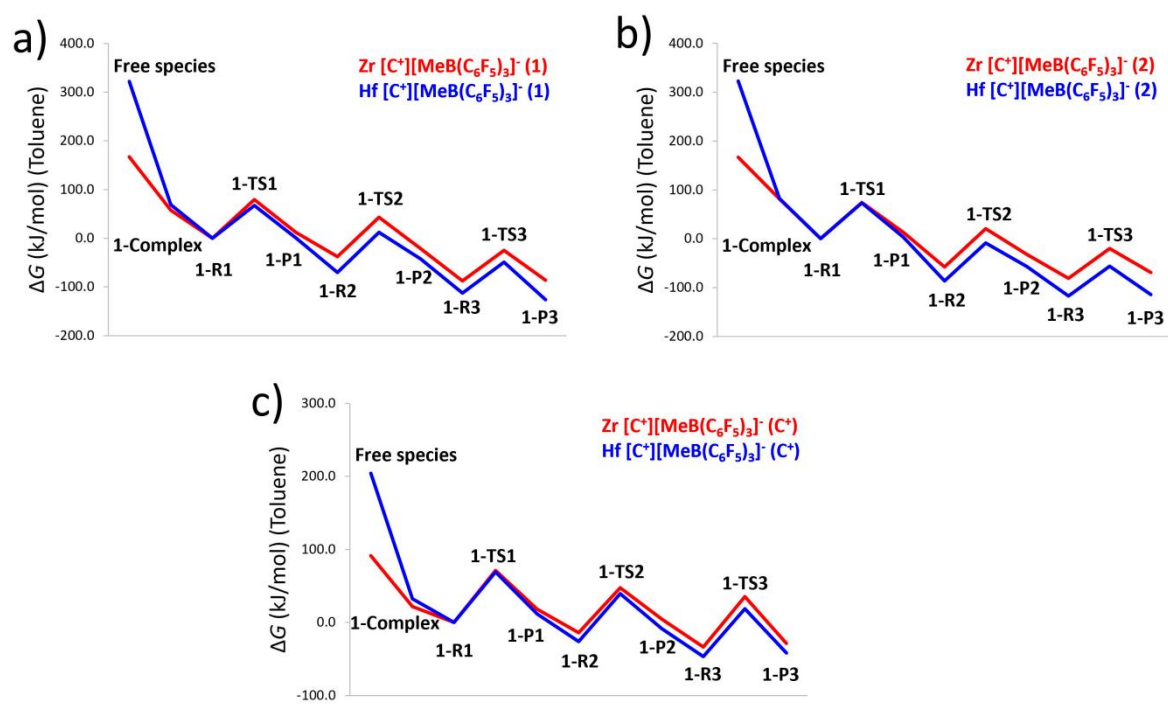

**Figure S7.** Gibbs free energy profiles in toluene for zirconocene and hafnocene catalyzed the chain initiation and propagation for the three different systems (C<sup>+</sup>, 1 and 2).

**Table S4.** Mulliken and Hirshfeld charges ( $q$ , in unit of  $e$ ) on the central metals of catalyst (M = Zr, Hf) and cocatalyst (B) as well as important distances in Å (M-O, M-B, B-C $^{\alpha}$ ) for zirconocene and hafnocene systems. Values are taken from the gas-phase optimised geometries at the B3LYP/LANL2DZ+6-31G(d) level of theory.

|                | Mulliken                                               |                    | Hirshfeld          |                    | Distances   |             |             |                                           |
|----------------|--------------------------------------------------------|--------------------|--------------------|--------------------|-------------|-------------|-------------|-------------------------------------------|
|                | $qM(\text{Zr/Hf})$                                     | $qB(\text{Zr/Hf})$ | $qM(\text{Zr/Hf})$ | $qB(\text{Zr/Hf})$ | Zr-Me/Hf-Me | Zr-O/Hf-O   | Zr-B/Hf-B   | Zr(B-C $^{\alpha}$ )/Hf(B-C $^{\alpha}$ ) |
|                | <b>B(C<sub>6</sub>F<sub>5</sub>)<sub>4</sub> (2)</b>   |                    |                    |                    |             |             |             |                                           |
| <b>Cation</b>  | 0.824/0.805                                            | n/a                | 0.659/0.623        | n/a                | 2.242/2.210 | n/a         | n/a         | n/a                                       |
| <b>Complex</b> | 0.792/0.771                                            | 0.398/0.397        | 0.507/0.457        | 0.038/0.038        | 2.278/2.253 | 2.175/2.121 | 7.345/7.365 | 5.836/5.833                               |
| <b>R1</b>      | 0.810/0.787                                            | 0.403/0.403        | 0.509/0.458        | 0.038/0.038        | 2.279/2.254 | 2.163/2.111 | 9.018/9.023 | 6.033/6.032                               |
| <b>TS1</b>     | 0.829/0.810                                            | 0.405/0.405        | 0.508/0.456        | 0.038/0.038        | 2.285/2.259 | 2.105/2.060 | 9.012/9.012 | 6.261/6.254                               |
| <b>P1</b>      | 0.826/0.810                                            | 0.395/0.395        | 0.506/0.455        | 0.039/0.039        | 2.288/2.262 | 2.081/2.037 | 9.273/9.273 | 5.999/6.003                               |
| <b>R2</b>      | 0.817/0.805                                            | 0.403/0.405        | 0.503/0.455        | 0.039/0.039        | 2.289/2.261 | 2.084/2.038 | 7.818/8.245 | 5.293/6.512                               |
| <b>TS2</b>     | 0.822/0.802                                            | 0.403/0.402        | 0.504/0.453        | 0.038/0.038        | 2.285/2.264 | 2.105/2.032 | 9.012/7.876 | 6.261/5.739                               |
| <b>P2</b>      | 0.838/0.818                                            | 0.399/0.398        | 0.506/0.455        | 0.038/0.038        | 2.290/2.264 | 2.059/2.016 | 8.710/8.710 | 5.408/5.895                               |
| <b>R3</b>      | 0.838/0.820                                            | 0.397/0.396        | 0.506/0.455        | 0.038/0.038        | 2.290/2.264 | 2.057/2.015 | 8.840/8.850 | 5.407/5.558                               |
| <b>TS3</b>     | 0.846/0.828                                            | 0.402/0.402        | 0.505/0.454        | 0.039/0.039        | 2.292/2.266 | 2.051/2.010 | 8.912/8.914 | 5.812/5.810                               |
| <b>P3</b>      | 0.838/0.825                                            | 0.394/0.394        | 0.509/0.458        | 0.040/0.040        | 2.291/2.264 | 2.060/2.017 | 9.332/9.347 | 5.744/5.747                               |
|                | <b>MeB(C<sub>6</sub>F<sub>5</sub>)<sub>3</sub> (1)</b> |                    |                    |                    |             |             |             |                                           |
| <b>Cation</b>  | 0.824/0.805                                            | n/a                | 0.659/0.623        | n/a                | 2.242/2.210 | n/a         | n/a         | n/a                                       |
| <b>Complex</b> | 0.785/0.768                                            | 0.384/0.383        | 0.508/0.458        | 0.032/0.033        | 2.282/2.256 | 2.174/2.118 | 7.371/7.376 | 5.712/5.710                               |
| <b>R1</b>      | 0.809/0.789                                            | 0.394/0.394        | 0.509/0.458        | 0.032/0.033        | 2.280/2.255 | 2.160/2.107 | 8.571/8.626 | 5.951/5.951                               |
| <b>TS1</b>     | 0.826/0.809                                            | 0.400/0.400        | 0.508/0.456        | 0.032/0.032        | 2.286/2.261 | 2.104/2.057 | 8.614/8.604 | 6.152/6.126                               |
| <b>P1</b>      | 0.823/0.808                                            | 0.402/0.402        | 0.506/0.455        | 0.032/0.033        | 2.289/2.263 | 2.081/2.038 | 9.056/9.053 | 5.708/5.709                               |
| <b>R2</b>      | 0.820/0.804                                            | 0.399/0.399        | 0.504/0.454        | 0.032/0.032        | 2.290/2.264 | 2.084/2.036 | 7.876/8.070 | 5.225/5.201                               |
| <b>TS2</b>     | 0.830/0.810                                            | 0.401/0.401        | 0.504/0.454        | 0.032/0.032        | 2.291/2.265 | 2.070/2.027 | 8.096/8.124 | 5.292/5.308                               |
| <b>P2</b>      | 0.832/0.811                                            | 0.395/0.395        | 0.503/0.452        | 0.032/0.033        | 2.293/2.267 | 2.060/2.017 | 8.376/8.381 | 5.314/5.317                               |
| <b>R3</b>      | 0.833/0.814                                            | 0.395/0.395        | 0.504/0.453        | 0.032/0.033        | 2.291/2.265 | 2.062/2.021 | 8.475/8.480 | 5.695/5.692                               |
| <b>TS3</b>     | 0.834/0.854                                            | 0.397/0.396        | 0.505/0.459        | 0.031/0.032        | 2.290/2.280 | 2.055/2.012 | 8.999/9.172 | 4.950/4.937                               |
| <b>P3</b>      | 0.835/0.818                                            | 0.388/0.387        | 0.505/0.455        | 0.030/0.031        | 2.291/2.264 | 2.059/2.017 | 8.956/8.955 | 5.909/5.914                               |

n/a means the data is not available

### a) system C<sup>+</sup>

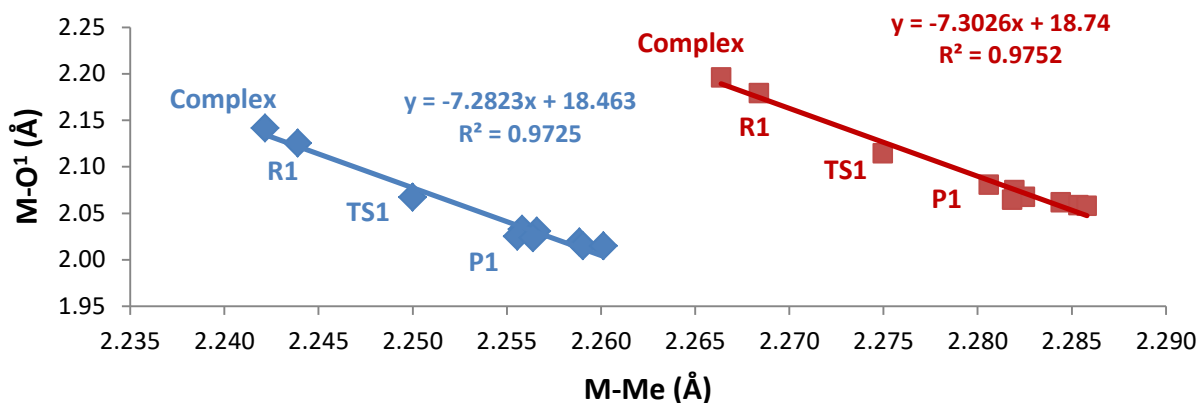

### b) system 1

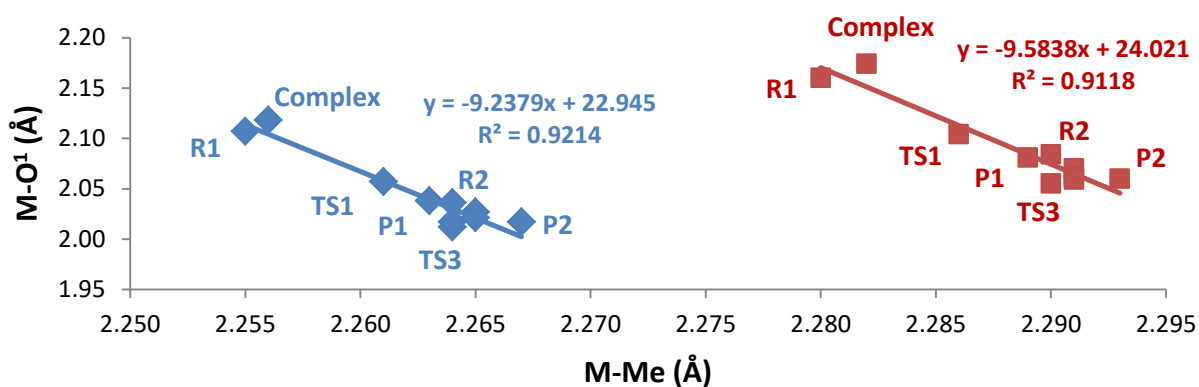

### c) system 2

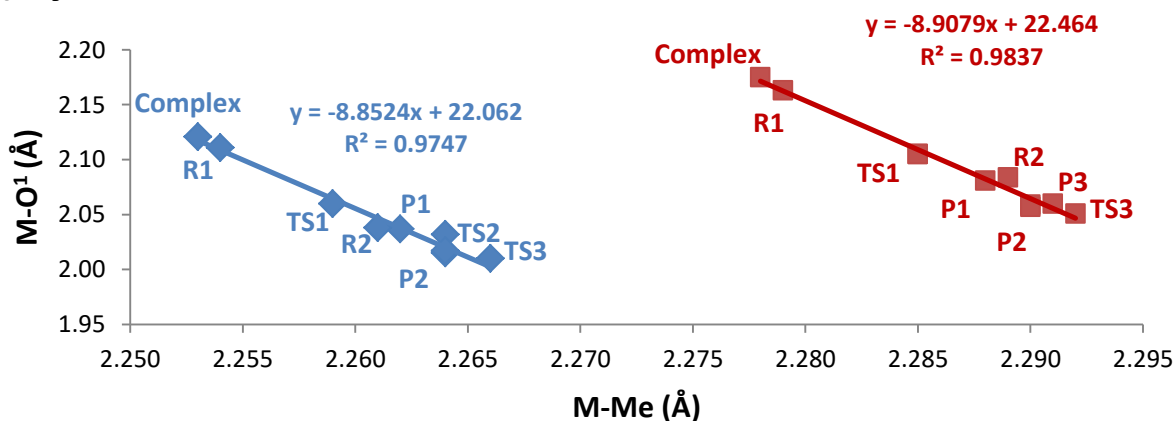

**Figure S8.** Correlations between the two bond lengths, metal to a carbonyl oxygen atom of CL monomer (M-O<sup>1</sup>) and metal to Me group of catalyst (M-Me) where M = Hf (blue) and Zr (red) for the three catalytic systems (C<sup>+</sup>, 1 and 2).

## VI. Effect of solvent on the HOMO-LUMO energies

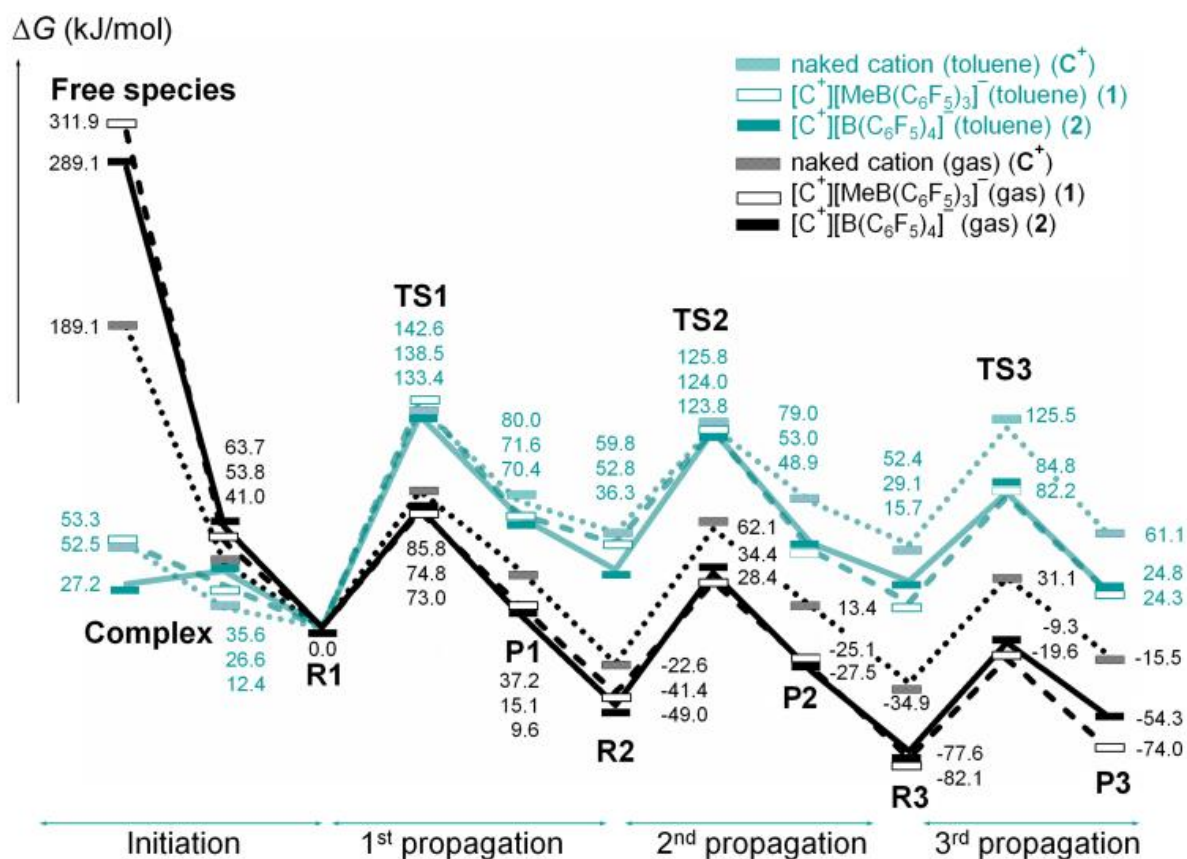

**Figure S9.** Calculated Gibbs free energy profiles in gas-phase (black) and toluene solution (cyan) for the chain initiation and propagation mechanism for the three catalytic systems ( $C^+$ , **1**, and **2**). All energies were relative to the energy of **R1** (set to 0.0). Values of gas-phase energies were computed at the B3LYP/LANL2DZ+6-31G(d) level, while the solution energies at the B3LYP(SMD, toluene)/LANL2DZ+6-31G(d) level.

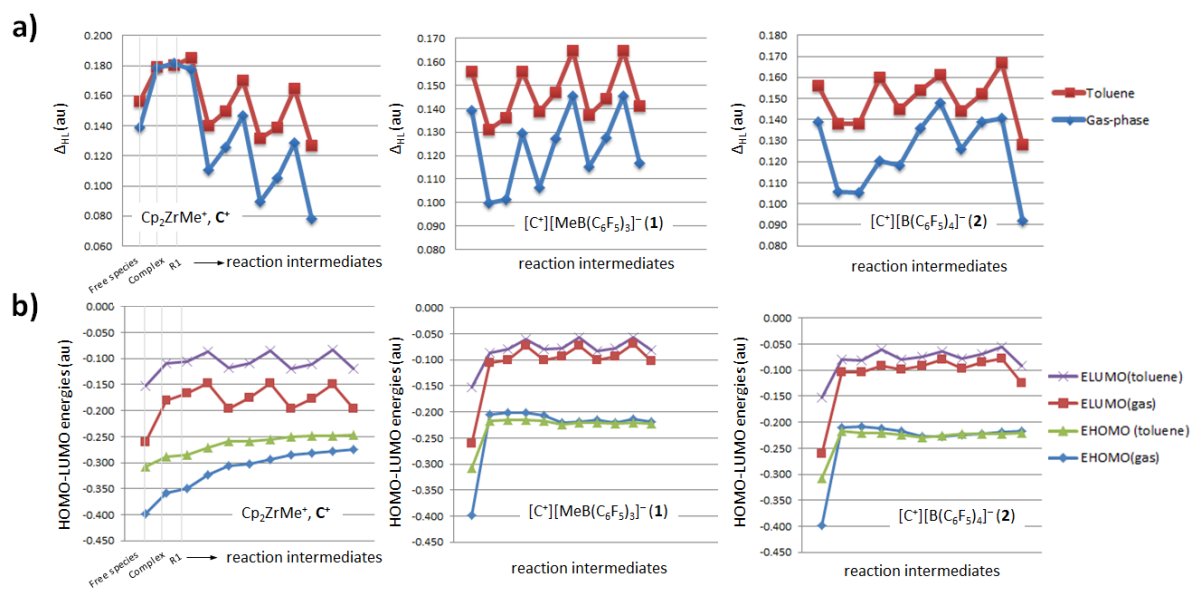

**Figure S10.** Effect of solvent toluene on the HOMO and LUMO energies and their differences (labeled as EHOMO and ELUMO, and  $\Delta_{HL}$ ) in comparison with the energies in gas-phase for the three catalytic systems ( $\text{C}^+$ , **1** and **2**).



**Table S5.** Comparison of Mulliken charge ( $q$ , in unit of  $e$ ) on Zr and B atoms in gas-phase and in toluene for the three catalytic systems ( $C^+$ , **1** and **2**). HOMO and LUMO energies,  $E_{\text{HOMO}}$  and  $E_{\text{LUMO}}$  in units of au, and energy gap,  $\Delta_{\text{HL}}$ , were also included.

| Systems              | Gas-phase       |                | Toluene         |                | Gas-phase         |                   |                      | Toluene           |                   |                      |
|----------------------|-----------------|----------------|-----------------|----------------|-------------------|-------------------|----------------------|-------------------|-------------------|----------------------|
|                      | $q_{\text{Zr}}$ | $q_{\text{B}}$ | $q_{\text{Zr}}$ | $q_{\text{B}}$ | $E_{\text{HOMO}}$ | $E_{\text{LUMO}}$ | $\Delta_{\text{HL}}$ | $E_{\text{HOMO}}$ | $E_{\text{LUMO}}$ | $\Delta_{\text{HL}}$ |
| <b>2</b>             |                 |                |                 |                |                   |                   |                      |                   |                   |                      |
| <b>Cation</b>        | 0.824           | -              | 1.022           | -              | -0.399            | -0.260            | 0.139                | -0.308            | -0.152            | 0.156                |
| <b>Complex</b>       | 0.792           | 0.398          | 0.840           | 0.394          | -0.210            | -0.104            | 0.105                | -0.218            | -0.080            | 0.138                |
| <b>R1</b>            | 0.810           | 0.403          | 0.863           | 0.400          | -0.209            | -0.104            | 0.105                | -0.220            | -0.082            | 0.138                |
| <b>TS1</b>           | 0.829           | 0.405          | 0.877           | 0.396          | -0.213            | -0.092            | 0.120                | -0.221            | -0.061            | 0.160                |
| <b>P1</b>            | 0.826           | 0.395          | 0.875           | 0.393          | -0.218            | -0.099            | 0.118                | -0.224            | -0.079            | 0.145                |
| <b>R2</b>            | 0.817           | 0.403          | 0.859           | 0.398          | -0.227            | -0.091            | 0.136                | -0.229            | -0.075            | 0.154                |
| <b>TS2</b>           | 0.822           | 0.403          | 0.864           | 0.399          | -0.227            | -0.079            | 0.148                | -0.225            | -0.064            | 0.161                |
| <b>P2</b>            | 0.838           | 0.399          | 0.873           | 0.393          | -0.224            | -0.098            | 0.126                | -0.222            | -0.078            | 0.144                |
| <b>R3</b>            | 0.838           | 0.397          | 0.876           | 0.394          | -0.223            | -0.084            | 0.139                | -0.222            | -0.070            | 0.152                |
| <b>TS3</b>           | 0.846           | 0.402          | 0.880           | 0.398          | -0.219            | -0.078            | 0.141                | -0.222            | -0.055            | 0.167                |
| <b>P3</b>            | 0.838           | 0.394          | 0.883           | 0.385          | -0.217            | -0.125            | 0.092                | -0.220            | -0.092            | 0.128                |
| <b>1</b>             |                 |                |                 |                |                   |                   |                      |                   |                   |                      |
| <b>Cation</b>        | 0.824           | -              | 1.022           | -              | -0.399            | -0.260            | 0.139                | -0.308            | -0.152            | 0.156                |
| <b>Complex</b>       | 0.785           | 0.384          | 0.855           | 0.383          | -0.205            | -0.106            | 0.100                | -0.217            | -0.086            | 0.131                |
| <b>R1</b>            | 0.809           | 0.395          | 0.864           | 0.394          | -0.201            | -0.100            | 0.101                | -0.216            | -0.079            | 0.136                |
| <b>TS1</b>           | 0.826           | 0.401          | 0.879           | 0.399          | -0.202            | -0.073            | 0.129                | -0.216            | -0.060            | 0.156                |
| <b>P1</b>            | 0.823           | 0.402          | 0.867           | 0.400          | -0.206            | -0.100            | 0.106                | -0.218            | -0.079            | 0.139                |
| <b>R2</b>            | 0.820           | 0.399          | 0.859           | 0.397          | -0.220            | -0.093            | 0.127                | -0.224            | -0.077            | 0.147                |
| <b>TS2</b>           | 0.830           | 0.402          | 0.862           | 0.398          | -0.218            | -0.073            | 0.145                | -0.221            | -0.056            | 0.165                |
| <b>P2</b>            | 0.832           | 0.395          | 0.875           | 0.394          | -0.216            | -0.101            | 0.115                | -0.221            | -0.083            | 0.137                |
| <b>R3</b>            | 0.833           | 0.396          | 0.872           | 0.395          | -0.220            | -0.093            | 0.128                | -0.223            | -0.078            | 0.144                |
| <b>TS3</b>           | 0.835           | 0.397          | 0.872           | 0.394          | -0.214            | -0.069            | 0.145                | -0.221            | -0.056            | 0.165                |
| <b>P3</b>            | 0.835           | 0.388          | 0.867           | 0.382          | -0.219            | -0.102            | 0.117                | -0.222            | -0.081            | 0.141                |
| <b>C<sup>+</sup></b> |                 |                |                 |                |                   |                   |                      |                   |                   |                      |
| <b>Cation</b>        | 0.824           | -              | 1.022           | -              | -0.399            | -0.260            | 0.139                | -0.308            | -0.152            | 0.156                |
| <b>Complex</b>       | 0.800           | -              | 0.885           | -              | -0.359            | -0.180            | 0.179                | -0.289            | -0.110            | 0.179                |
| <b>R1</b>            | 0.812           | -              | 0.879           | -              | -0.349            | -0.167            | 0.182                | -0.286            | -0.106            | 0.180                |
| <b>TS1</b>           | 0.835           | -              | 0.897           | -              | -0.324            | -0.147            | 0.177                | -0.272            | -0.087            | 0.185                |
| <b>P1</b>            | 0.841           | -              | 0.898           | -              | -0.306            | -0.196            | 0.111                | -0.258            | -0.119            | 0.140                |
| <b>R2</b>            | 0.842           | -              | 0.893           | -              | -0.302            | -0.176            | 0.126                | -0.259            | -0.109            | 0.149                |
| <b>TS2</b>           | 0.848           | -              | 0.910           | -              | -0.294            | -0.148            | 0.146                | -0.256            | -0.086            | 0.170                |
| <b>P2</b>            | 0.849           | -              | 0.889           | -              | -0.285            | -0.196            | 0.089                | -0.251            | -0.119            | 0.132                |
| <b>R3</b>            | 0.856           | -              | 0.889           | -              | -0.282            | -0.177            | 0.105                | -0.249            | -0.110            | 0.139                |
| <b>TS3</b>           | 0.857           | -              | 0.882           | -              | -0.279            | -0.150            | 0.129                | -0.248            | -0.083            | 0.165                |
| <b>P3</b>            | 0.854           | -              | 0.895           | -              | -0.274            | -0.196            | 0.078                | -0.246            | -0.119            | 0.127                |

## VII. Observed planes on the stationary points for the naked model

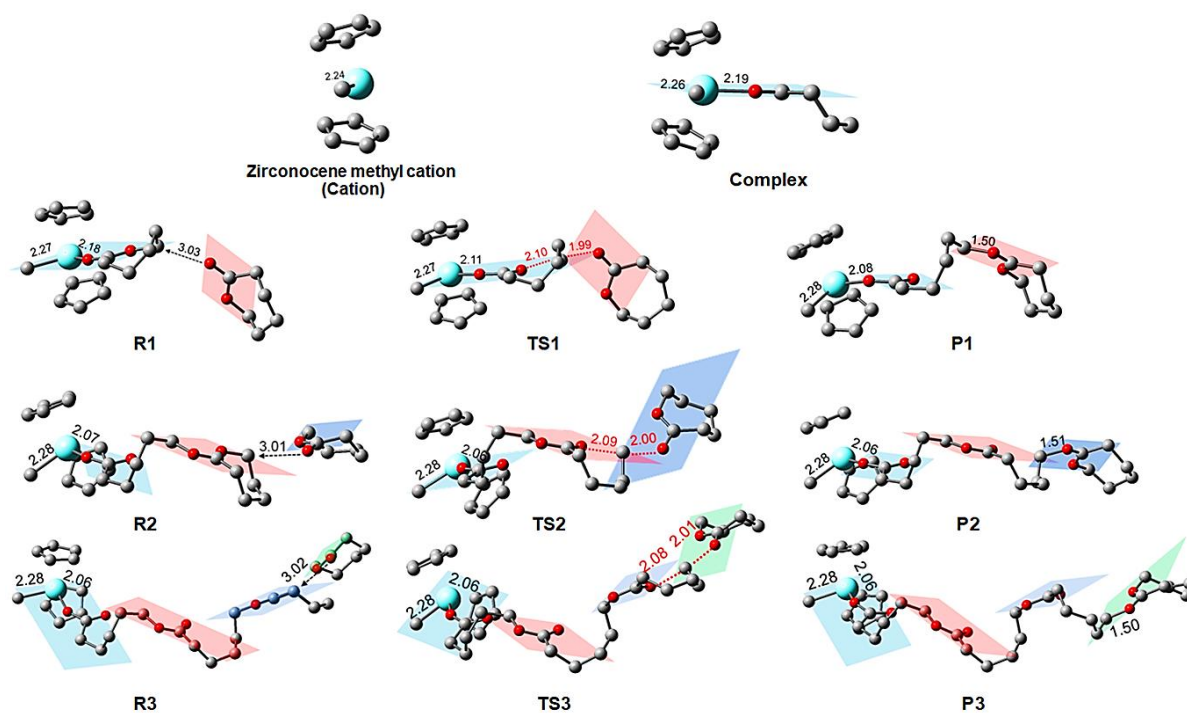

**Figure S11.** Observed planes on the stationary points in the initiation and chain propagation for the naked model ( $C^+$ ).  $R^n$ ,  $TS^n$ , and  $P^n$  ( $n = 1-3$ ) denote reactant, transition state and product for the first, second and third propagation, respectively.

## VIII. Additional data from NCI analysis

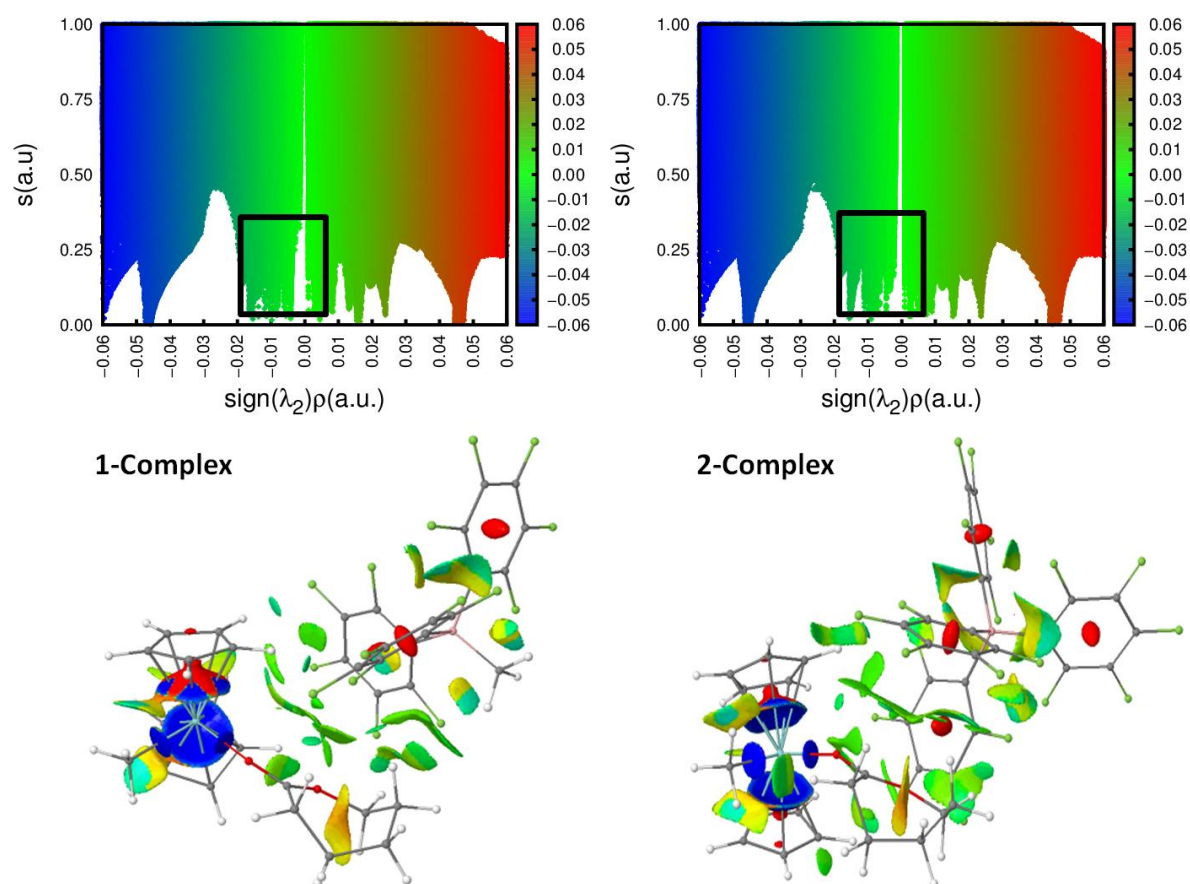

**Figure S12. NCI analysis of Complex species.** 2D (upper panel) and 3D (lower panel) isosurfaces of the **Complex** structures resulting from the initiation step of the zirconocene/borate systems **1** and **2**. Toluene-optimised geometries were used as inputs for this NCI analysis using promolecular density. The gradient 2D isosurfaces ( $s = 1.0$  a.u.) are colored on a BGR scale according to the sign  $(\lambda_2)\rho$  over the range  $-0.06$  to  $0.06$  a.u., whereas the 3D representations are visualised with the cutoff,  $s = 0.3$  a.u. (atom color code: light gray, C; dark blue, N; white, H; red, O; pink, B; green, F; cyan, Zr).

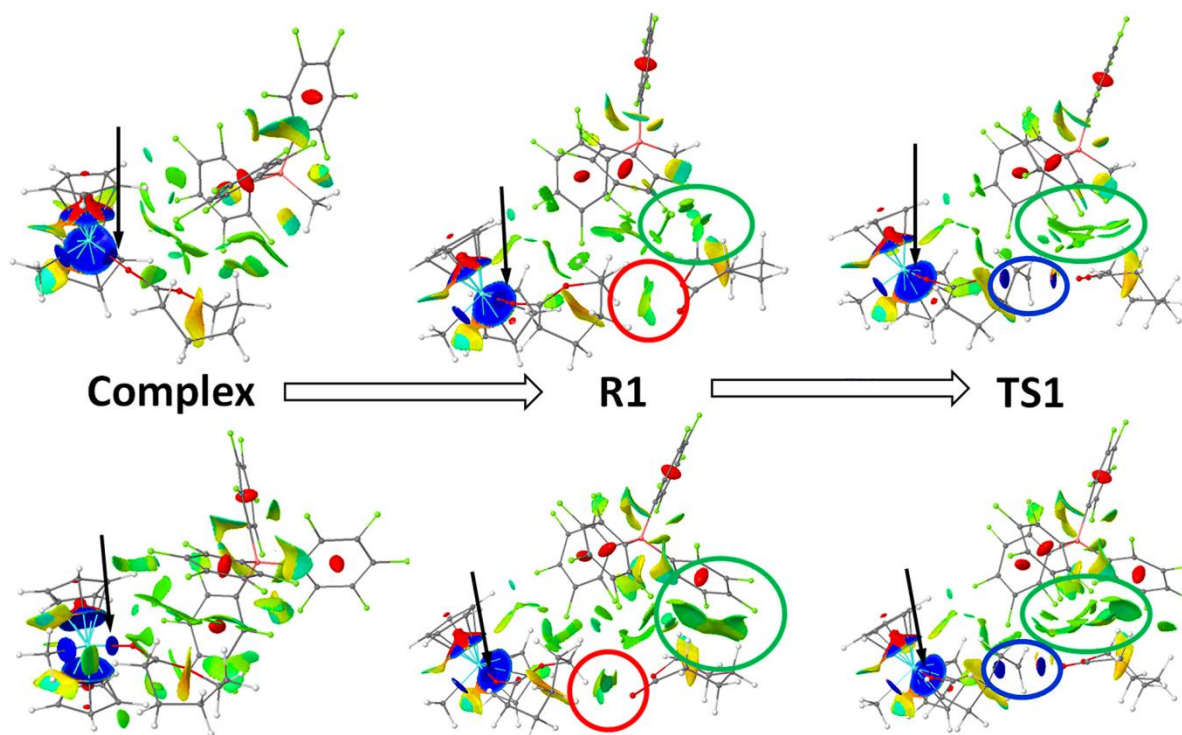

**Figure S13.** Evolution of 3D isosurfaces ( $s = 0.3$  a.u.) of selected structures (**Complex**, **R1**, and **TS1**) along the reaction pathway. Black arrows indicate the attractive Zr-O interactions, in blue, with the intensity gradually decreasing from thin isosurfaces at **Complex** into donut-shaped isosurfaces at **TS1**. Red and green circles indicates van der Waals regions corresponding to the interacting sites of CL monomer to the  $C^\alpha$  atom and the  $-C_6F_5$  ring of counteranion, respectively. Blue circles indicate the appearance of two attractive forces near the  $C^\alpha$  position.

**Transition state comparison (TS3 vs. TS3<sup>ter</sup>).** The results in Figures S14-S15 indicate a marked difference between the two transition states (TS3 and TS3<sup>ter</sup>). There are two blue-green peaks at low density gradient near  $\text{sign}(\lambda_2)\rho = -0.03$  and  $-0.02$  a.u., which are not present at 1-TS3 (see blue arrows). However, in case of  $[\text{B}(\text{C}_6\text{F}_5)_4]^-$ , intensity of the blue and disk-shaped isosurfaces between a methanol molecule and the  $-\text{C}_6\text{F}_5$  rings is disappeared at  $-0.03$  scale in the 2D NCI plot (see Fig. S15(b) below), which is the indication of weaker attractive interactions compared to the case of  $[\text{MeB}(\text{C}_6\text{F}_5)_3]^-$ . These results could explain the favourable termination over the third propagation in the  $[\text{MeB}(\text{C}_6\text{F}_5)_3]^-$  system (Table 2). A slight difference at the vdW contact is found between the two distinct molecule (CL and  $\text{CH}_3\text{OH}$ ) and the  $-\text{C}_6\text{F}_5$  rings (see peaks near  $\text{sign}(\lambda_2)\rho = 0.02$  a.u., Fig. S15).

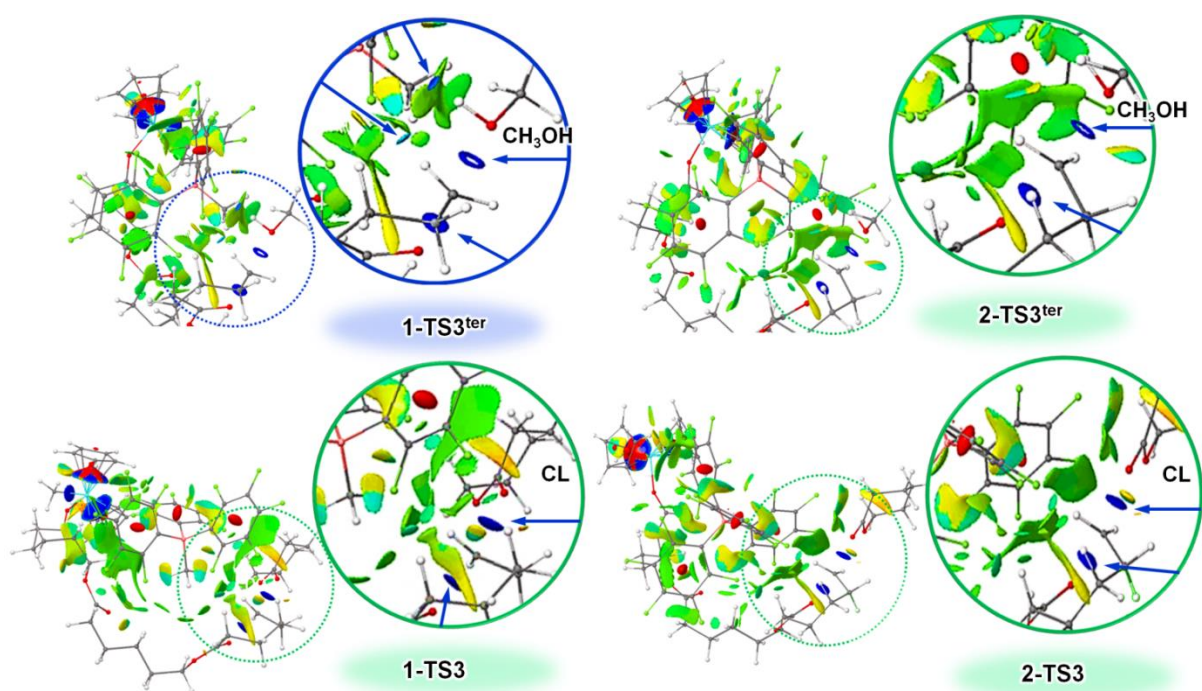

**Figure S14.** Comparison of 3D NCI isosurfaces between two transition states (TS3 and TS3<sup>ter</sup>) in the 1<sup>st</sup> termination and the 3<sup>rd</sup> propagation for zirconocene/borate systems **1** and **2**. Circle lines and images indicate bond-breaking and forming regions with distinct interaction types and strengths. Blue circles indicate more attractive interactions compared to the corresponding interactions at the same region (see blue arrows). The greater the intensity of the 3D isosurface, the stronger the interacting forces present.

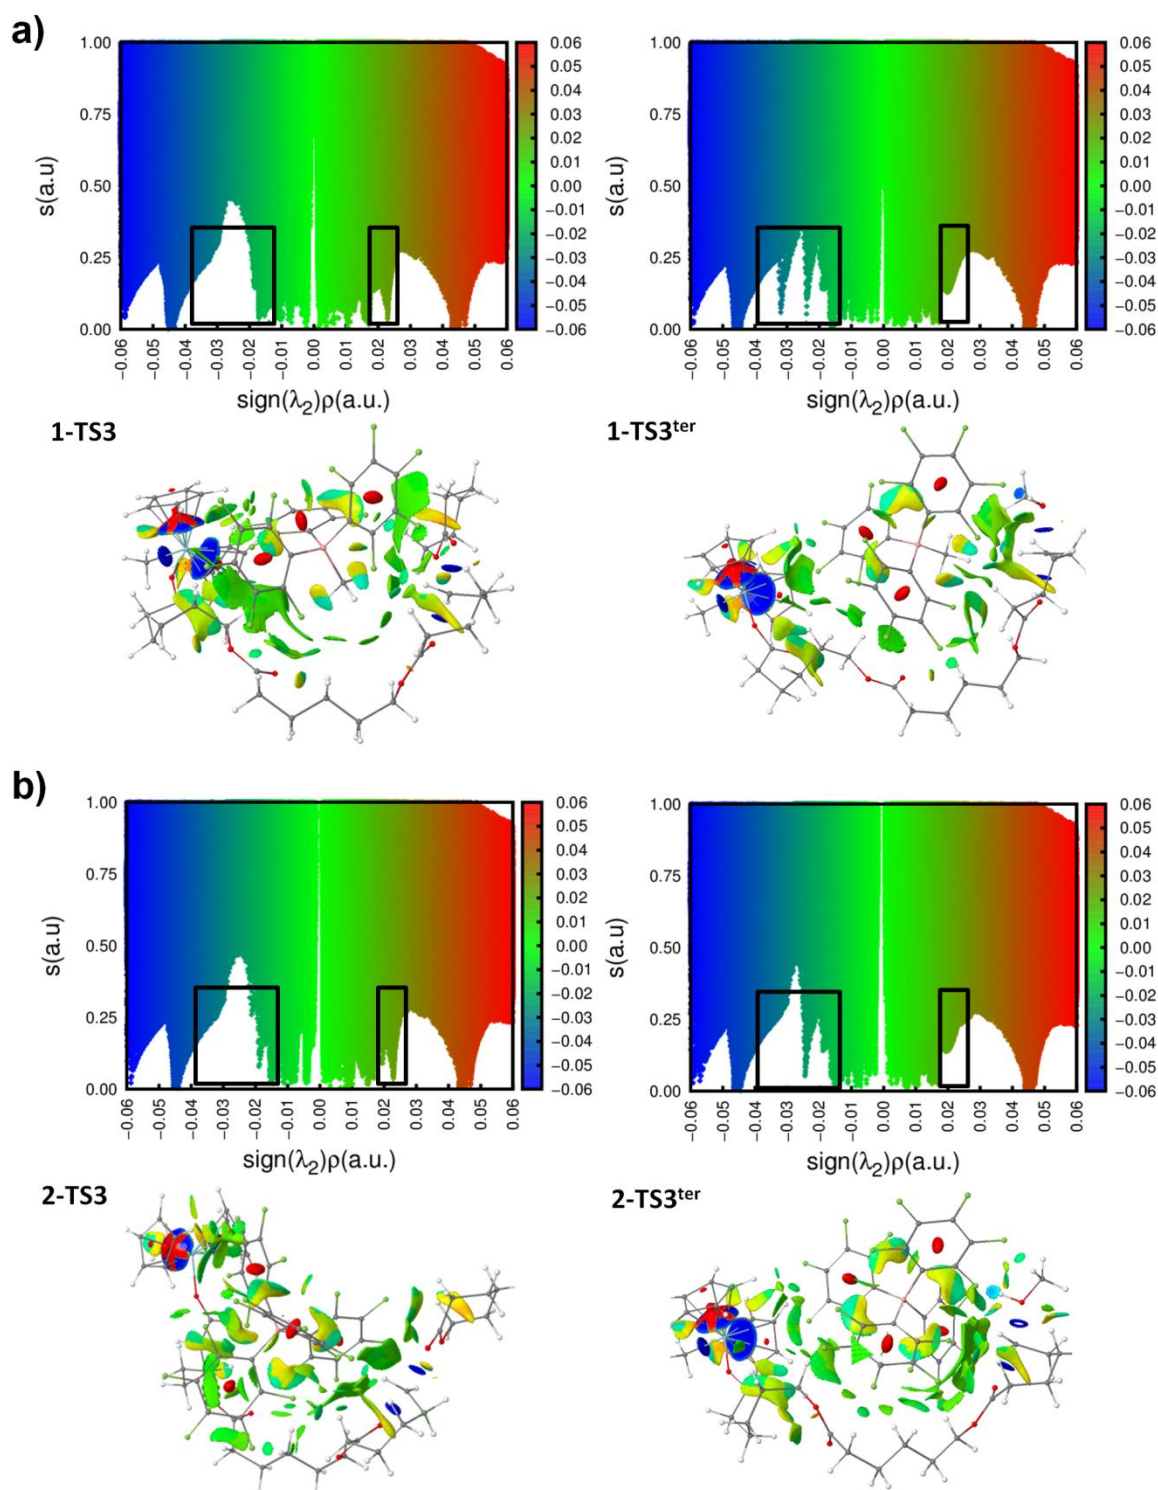

**Figure S15.** Comparison of 2D and 3D NCI plots between two computed transition states in the 3<sup>rd</sup> propagation and the 1<sup>st</sup> termination (TS3 vs. TS3<sup>ter</sup>) for zirconocene/borate systems **1** (a) and **2** (b). Toluene-optimised geometries were used as inputs for this NCI analysis using promolecular density. Rectangular lines indicate two marked differences on the RDG plots between TS3 and TS3<sup>ter</sup> of both reaction steps: the large one indicates the absence and presence of one or two spikes at -0.04 to -0.03 a.u. and -0.03 to -0.02 a.u. at low gradients, while small rectangular lines indicating a lack of weak interactions formed by the counteranion and an incoming CL monomer.

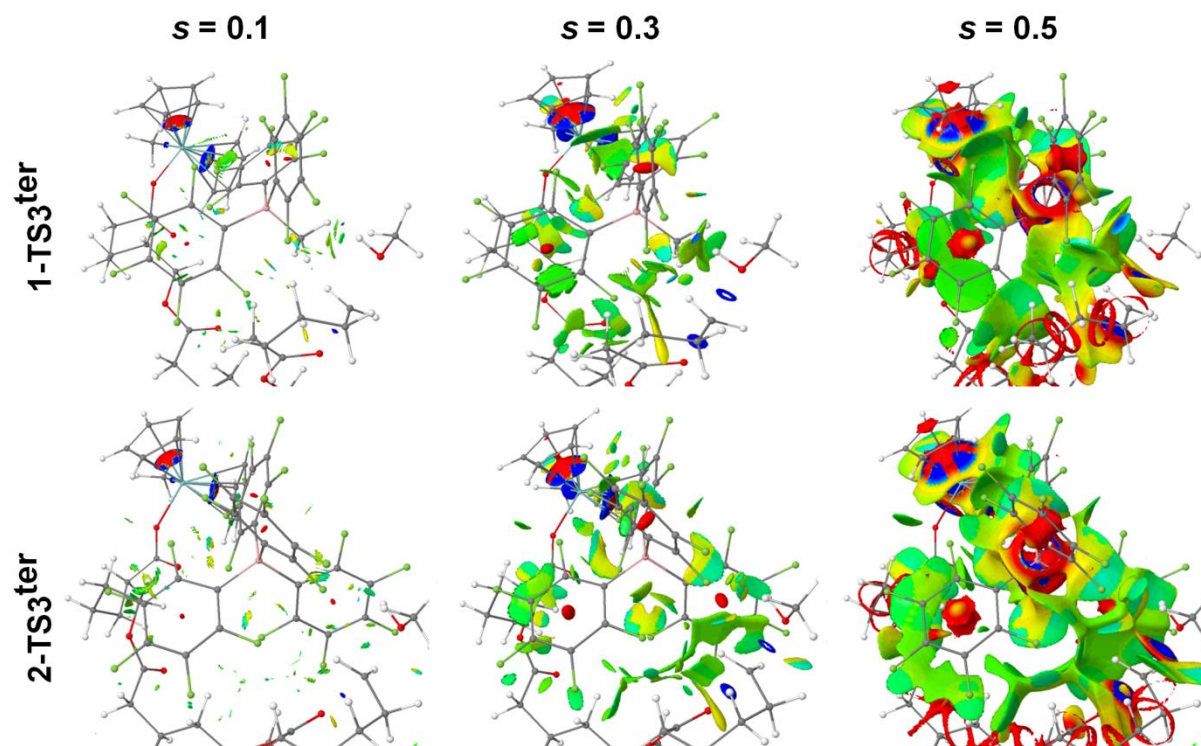

**Figure S16.** 3D isosurfaces of **1-TS3<sup>ter</sup>** (upper panel) and **2-TS3<sup>ter</sup>** (lower panel) using different cutoff ( $s = 0.1, 0.3$  and  $0.5$ ).

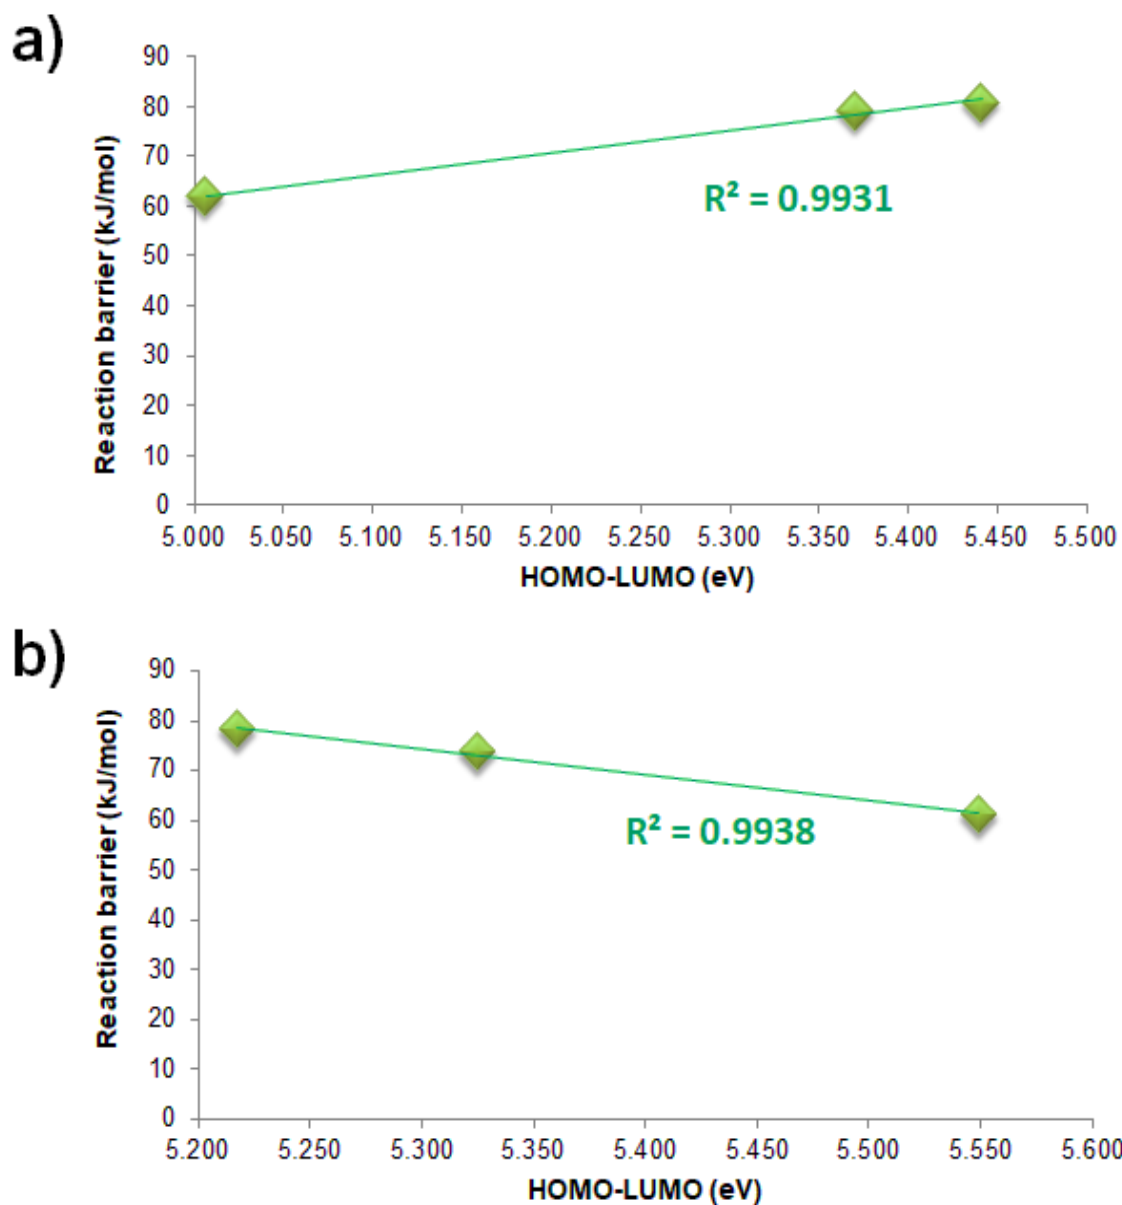

**Figure S17.** Linear correlation between the HOMO-LUMO energy gaps (eV) and reaction barriers (kJ/mol) calculated for the cocatalyst systems, **1** (a) and **2** (b). The HOMO-LUMO gaps were obtained as the difference between the HOMO energy of the CL monomer (-7.000 eV) and the LUMO energies of the transition states of the zirconocene/borate systems (**1** and **2**).



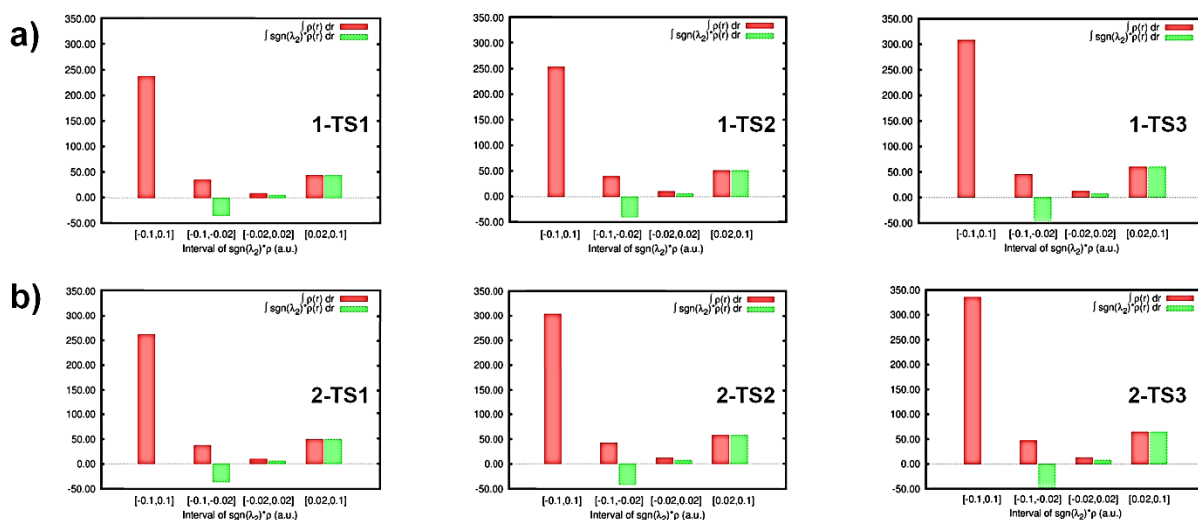

**Figure S18.** Bar charts showing volume integrals of electron density ( $\int \rho(r) dr$  in red and  $\int \text{sgn}(\lambda_2) \rho(r) dr$  in green) from 2D-RDG isosurfaces in different  $\text{sgn}(\lambda_2) \rho(r)$  intervals for transition states (**TS1**, **TS2** and **TS3**) in the zirconocene/borate systems, **1** (a) and **2** (b). The plots provide a quantitative estimate of the interaction strength, based on integration over the NCI regions. If we look at the total density in the [-0.1, 0.1] range, we recognise the increment for the  $\int \rho(r) dr$  values from **TS1** to **TS3** in both **1** and **2**. Other ranges [-0.1, -0.02] and [0.02, 0.1] related to the attractive and repulsive interactions, respectively, also show the same trend, with the former being significantly increased (shown in green bar).

## IX. References

1. J. Kumawat and V. K. Gupta, *ACS Catal.*, 2020, **10**, 1704-1715.
2. J. Chen, A. Motta, J. Zhang, Y. Gao and T. J. Marks, *ACS Catal.*, 2019, **9**, 8810-8818.
3. J. Jitonnom and W. Meelua, *J. Organomet. Chem.*, 2017, **841**, 48-56.

# X. XYZ coordinates for all optimized species

## A. Optimized species shown in Figure 1

### C<sup>-</sup>-Complex\_front

|    |            |            |            |
|----|------------|------------|------------|
| C  | -0.0060900 | -0.2595240 | -0.6937290 |
| C  | -0.3389680 | -0.2506070 | 0.6853800  |
| C  | 1.4002790  | -0.0816660 | -0.8103420 |
| C  | 1.9418340  | 0.1077100  | 0.4942070  |
| C  | 2.9825540  | 0.1734970  | 0.7419230  |
| C  | 0.8645700  | -0.1008220 | 1.4232060  |
| C  | 1.4071610  | -4.0171250 | 2.2405150  |
| C  | 2.2473460  | -2.8981560 | 2.4792410  |
| C  | 1.8818470  | -4.6787820 | 1.0780510  |
| C  | 3.2565100  | -2.8794360 | 1.4699140  |
| C  | 4.3019730  | -3.9858530 | 0.6141270  |
| Zr | 1.0571240  | -2.3665190 | 0.3116840  |
| C  | -1.0305590 | -3.1526210 | 0.7136880  |
| H  | -1.4404370 | -2.9381160 | 1.7082770  |
| H  | -1.7199360 | -2.7206850 | -0.0283400 |
| H  | -1.0296360 | -4.2434490 | 0.5889750  |
| H  | 1.9629840  | -0.0348960 | -1.7347590 |
| H  | -0.7066680 | -0.3568560 | -1.5138390 |
| H  | -1.3328820 | -0.3398560 | 1.1010740  |
| H  | 0.5580050  | -4.3154650 | 2.8397270  |
| H  | 1.4519240  | -5.5686660 | 0.6302500  |
| H  | 3.6279730  | -4.2465210 | -0.2511760 |
| H  | 4.0718840  | -2.1724350 | 1.3960150  |
| H  | 2.1712220  | -2.2124170 | 3.3128970  |
| H  | 0.9435170  | -0.0227660 | 2.4998570  |
| H  | -1.1539910 | -4.7456820 | -3.7796430 |
| H  | -0.5042920 | -6.0826160 | -4.1737270 |
| H  | -1.2042490 | -4.0411480 | -4.6163530 |
| H  | -2.1548870 | -4.8697590 | -3.3668980 |
| C  | 1.8814420  | -3.7615150 | -0.4008600 |
| C  | 0.7137250  | -5.9827070 | -0.5032850 |
| C  | -0.3042420 | -6.6588290 | -3.2607840 |
| H  | -1.3161610 | -6.6340990 | -4.7193230 |
| H  | 1.8912990  | -5.2337100 | -4.4167010 |
| H  | 1.0387340  | -3.2773000 | -4.8636720 |
| H  | 2.5057120  | -3.2028300 | -3.8809660 |
| H  | 0.4480090  | -5.4902560 | -5.9991370 |
| H  | 1.0420500  | -6.9940000 | -5.3174900 |
| H  | 2.2549800  | -5.7685180 | -3.5296930 |
| H  | 2.7255870  | -5.2116370 | -5.1254220 |
| O  | -0.4456720 | -4.0875550 | -2.6705310 |
| O  | 0.7745900  | -3.6243750 | -2.7768880 |
| O  | 1.2642300  | -3.0736160 | -1.7697550 |

### C<sup>-</sup>-RI\_front

|   |            |             |            |
|---|------------|-------------|------------|
| C | 0.3892620  | 0.3606300   | 0.0761320  |
| C | 0.4232470  | 0.3415790   | 1.4947050  |
| C | 1.6853880  | 0.0225120   | -0.4014040 |
| C | 2.5143810  | -0.2287020  | 0.7182890  |
| C | 3.5646380  | -0.4873550  | 0.6878830  |
| C | 1.7303810  | -0.0395090  | 1.8948640  |
| C | 1.0214250  | -3.9812780  | 2.4458710  |
| C | 2.2557550  | -3.2815770  | 2.4004750  |
| C | 0.8349620  | -4.6193360  | 1.1919960  |
| C | 2.8416470  | -3.5023110  | 1.1186530  |
| C | 1.9651440  | -4.3353010  | 0.3801800  |
| C | -1.2370470 | -2.1061170  | 1.7974370  |
| H | -1.2154860 | -1.8614790  | 2.8665350  |
| H | -1.9001860 | -1.3786970  | 1.3094290  |
| H | -1.1891290 | -3.1036840  | 1.6942490  |
| H | 1.9830460  | -0.0461370  | -1.4450760 |
| C | -0.6977760 | -3.0279580  | -3.4854600 |
| C | -1.3326800 | -4.1619130  | -4.2991600 |
| H | -1.1155500 | -2.0540730  | -3.7827120 |
| H | 0.3770790  | -2.9556450  | -3.6787230 |
| C | -2.9578020 | -4.4037350  | -1.8895800 |
| C | -2.8652930 | -4.0467420  | -4.4253940 |
| H | -1.0641020 | -5.1270280  | -3.8555850 |
| O | -0.8853970 | -4.1543460  | -5.2958210 |
| C | -3.5633640 | -3.7084550  | -3.0962160 |
| C | -3.6315690 | -4.3880980  | -1.0334900 |
| H | -2.6755430 | -5.4364290  | -2.0940260 |
| C | -3.2593800 | -4.9970300  | -4.7971750 |
| H | -3.1190640 | -3.2799000  | -5.1673460 |
| H | -4.6083980 | -4.0287870  | -3.1477640 |
| H | -3.5812200 | -2.6262530  | -2.9083020 |
| O | -1.7640980 | -3.7149660  | -1.3272720 |
| O | -0.8217600 | -3.1000180  | -1.9793830 |
| O | 0.0495450  | -2.5117750  | -1.2921730 |
| H | -0.4689190 | 0.6089590   | -0.5356070 |
| H | -0.3997990 | 0.5767730   | 1.5476200  |
| H | 0.3433440  | -4.0227210  | 3.2871380  |
| H | -0.0187630 | -5.2210350  | 0.9073780  |
| H | 2.1280020  | -4.6842830  | -0.6323330 |
| H | 3.8053580  | -3.1356420  | 0.7851380  |
| H | 2.7001520  | -2.7218050  | 3.2131250  |
| H | 2.0841530  | -0.1195220  | 2.9147790  |
| C | -3.7684460 | -1.0276770  | -2.2529490 |
| C | -3.7058570 | -1.8995860  | -3.5355940 |
| H | -4.6830040 | -1.0277480  | -1.6829370 |
| H | -2.9157030 | -1.0298980  | -1.6096110 |
| C | -5.8402390 | -8.6049240  | -3.6184510 |
| C | -5.0196240 | -10.9539820 | -4.3271330 |

|    |            |             |            |
|----|------------|-------------|------------|
| H  | -2.8898470 | -10.5079370 | -4.1575250 |
| H  | -3.4184470 | -11.9206240 | -3.2535120 |
| C  | -5.5570890 | -9.5896820  | -4.7769690 |
| H  | -6.3610490 | -9.1298540  | -2.8059150 |
| H  | -6.4952130 | -7.7999000  | -3.9582030 |
| H  | -5.7835870 | -11.4486290 | -3.7099820 |
| H  | -4.8793160 | -11.5910770 | -5.2084560 |
| H  | -4.8646960 | -9.1220050  | -5.4891050 |
| H  | -6.4966420 | -9.7428780  | -5.3197200 |
| O  | -3.6420250 | -8.6462950  | -2.4705620 |
| C  | -4.6003370 | -7.9172760  | -3.0776520 |
| O  | -4.4178800 | -6.7179480  | -3.1857180 |
| Zr | 0.7689750  | -2.0848250  | 0.7383880  |

### C<sup>-</sup>-TS1\_front

|    |            |             |            |
|----|------------|-------------|------------|
| C  | 1.0494010  | 0.2859600   | -0.5545380 |
| C  | 0.8026100  | 0.3148980   | 0.8465890  |
| C  | 2.3046880  | -0.3322470  | 0.7667080  |
| C  | 2.8252630  | -0.7226440  | 0.4942520  |
| C  | 3.7799860  | -1.2020520  | 0.6700150  |
| C  | 1.9000490  | -0.3010090  | 1.4950600  |
| O  | -0.3909970 | -3.6407360  | 1.9589940  |
| C  | 0.8197450  | -3.1743450  | 2.5281100  |
| C  | -0.0649900 | -4.5054350  | 0.8808720  |
| C  | 1.9019540  | -3.7671770  | 1.8114890  |
| C  | 1.3495400  | -4.5984110  | 0.8061800  |
| Zr | -1.5247900 | -2.1722350  | 0.1831200  |
| C  | -1.4252550 | -1.6611310  | -0.1748740 |
| C  | -2.1769960 | -2.2065560  | 0.4015950  |
| H  | -1.6999760 | -0.6031550  | -0.1798950 |
| H  | -1.4971840 | -2.0285000  | -1.2597000 |
| C  | 2.7649260  | -0.5224820  | -1.7271690 |
| C  | 1.6374680  | -3.9327950  | -3.8781950 |
| C  | 1.2242980  | -5.0787780  | -4.8109790 |
| H  | 1.7068530  | -2.9821580  | -4.4264640 |
| H  | 2.6439860  | -4.1056440  | -3.4806350 |
| C  | -1.7114930 | -4.9786570  | -4.0011910 |
| C  | 0.0847650  | -4.7533380  | -5.7924090 |
| H  | 0.9670820  | -5.9561010  | -4.2038230 |
| H  | 2.1008090  | -5.3746020  | -5.3995790 |
| H  | -1.1852850 | -4.1750500  | -5.1504220 |
| H  | -2.4540370 | -4.5630010  | -3.3372880 |
| H  | -1.2945190 | -5.9328700  | -3.7240680 |
| H  | -0.1743290 | -5.6646280  | -6.3462470 |
| H  | 0.4421480  | -4.0331870  | -6.5387960 |
| H  | -1.9799130 | -4.0898820  | -5.8995790 |
| H  | -1.0192310 | -3.1556340  | -4.7859940 |
| O  | -0.4030720 | -4.1936500  | -2.5490900 |
| C  | 0.7393630  | -3.6940460  | -2.6700460 |
| C  | 1.2484340  | -2.9236370  | -1.7693480 |
| H  | 0.3918210  | 0.6748200   | -1.3214130 |
| H  | -0.0693270 | 0.7348620   | 1.3014660  |
| H  | -1.3863800 | -3.3791600  | 2.2893830  |
| H  | -0.7680690 | -4.9961600  | 0.2231320  |
| H  | 1.9127700  | -5.1776250  | 0.0856250  |
| C  | 2.9551470  | -3.6342640  | 2.0231920  |
| H  | 0.9676750  | -2.5228950  | -3.3875890 |
| C  | 2.0308720  | -0.4060350  | 2.5637330  |
| H  | -1.1282380 | -8.4458040  | -2.7299490 |
| C  | -3.8842200 | -9.7818310  | -3.4211660 |
| H  | -5.1933960 | -8.2029290  | -2.6543550 |
| C  | -3.7002700 | -8.4343450  | -1.7272140 |
| H  | -4.8563500 | -7.5353290  | -5.3963560 |
| H  | -4.7326080 | -10.0209160 | -6.6779380 |
| H  | -2.8127740 | -9.8689720  | -4.6447440 |
| C  | -4.1086810 | -10.5642110 | -2.6853400 |
| C  | -4.5287260 | -8.9943680  | -5.1994960 |
| H  | -5.7999390 | -7.5047510  | -4.8343650 |
| H  | -4.9819680 | -6.9110610  | -6.2830650 |
| H  | -5.7942450 | -10.0309380 | -4.3932770 |
| H  | -4.5119580 | -11.0204230 | -5.0691620 |
| H  | -3.5020440 | -9.0428030  | -6.1851500 |
| H  | -5.1831910 | -9.2504960  | -6.6393740 |
| O  | -3.4420580 | -7.3236740  | -3.7498770 |
| C  | -3.7729190 | -6.8808270  | -4.5755090 |
| O  | -3.1488030 | -5.9106190  | -5.0307550 |

### I-Complex\_front

|    |             |              |              |
|----|-------------|--------------|--------------|
| C  | -0.1425230  | 0.0112670    | -0.0119990   |
| C  | -0.2021620  | -0.2327260   | 1.3849130    |
| C  | 1.1549160   | 0.5009090    | -0.3221120   |
| C  | 1.9066320   | 0.5380490    | 0.8771370    |
| H  | 2.9309650   | 0.8718110    | 0.9465740    |
| C  | 1.0678480   | 0.0787350    | 1.9350300    |
| C  | 2.5257410   | -3.5881660   | 2.0745860    |
| C  | 3.2061490   | -2.3518270   | 2.2350280    |
| H  | 2.9309650   | -4.0929170   | 0.7841900    |
| C  | 3.9414760   | -2.0936180   | 1.0409130    |
| C  | 3.7191150   | -3.1783060   | 0.1546400    |
| Zr | 1.4803610   | -1.9320310   | 0.4350590    |
| C  | -0.2915890  | -3.1880930   | 1.1296690    |
| C  | -0.5005970  | -3.1673910   | 2.2063910    |
| H  | -1.1980370  | -2.8450680   | 0.6120360    |
| O  | -0.1068920  | -4.2320350   | 0.8462280    |
| H  | 1.5267560   | 0.7617480    | -1.3044120   |
| C  | 0.4222000   | -1.9632330   | -3.8855130   |
| O  | -0.2026910  | -2.6080840   | -5.2047300   |
| H  | -0.1068920  | -1.1350720   | -3.6161040   |
| H  | 1.4071440   | -1.5053570   | -3.9986710   |
| C  | -0.9822660  | -4.6568310   | -3.3997170   |
| C  | -0.2026910  | -2.9782680   | -5.2660320   |
| H  | 0.5996970   | -3.4840160   | -5.4176770   |
| O  | 0.2113010   | -1.8927600   | -6.0014120   |
| C  | -2.0123960  | -3.7247630   | -4.0151570   |
| H  | -1.4393500  | -5.3997180   | -2.7478450   |
| H  | -0.3694790  | -5.1756370   | -4.1333450   |
| H  | -1.6728050  | -3.6146940   | -6.1408660   |
| H  | -2.1141610  | -2.0735660   | -5.4092850   |
| H  | -2.8743790  | -4.3408860   | -4.2856400   |
| H  | -2.3560580  | -3.0282280   | -3.2377040   |
| O  | -0.0633380  | -3.9674730   | -2.4582900   |
| C  | 0.5120480   | -2.8153880   | -2.6399540   |
| H  | 1.1777190   | -2.3707320   | -1.6702730   |
| H  | -0.9526430  | -0.1381390   | -0.7151080   |
| H  | -1.0605790  | -0.5957280   | 1.9325650    |
| O  | 1.8889680   | -4.0645010   | 2.8074580    |
| C  | 2.8056990   | -5.0170600   | 0.3501030    |
| H  | 4.1677430   | -3.2992490   | -0.8215810   |
| H  | 4.6013830   | -1.2558700   | 0.8566680    |
| C  | 3.2030280   | -1.7348270   | 3.1239110    |
| H  | 1.3359170   | 0.0222410    | 2.9821220    |
| C  | -2.9163444  | -12.6347555  | -10.3718571  |
| H  | -5.15235736 | -12.7598245  | -10.98708171 |
| C  | -3.62921764 | -13.32941795 | -10.83496171 |
| H  | -6.87987664 | -12.85615495 | -9.30311571  |
| C  | -3.60905664 | -11.40025095 | -12.88172771 |
| C  | -1.50419464 | -12.85528795 | -12.51843071 |
| H  | -0.92832964 | -11.90896295 | -10.63825771 |
| H  | -1.05923764 | -13.66226995 | -10.56812771 |
| H  | -2.12714664 | -11.65529195 | -13.24319171 |
| H  | -4.15797264 | -12.35216695 | -12.87385971 |
| H  | -4.07680864 | -10.75860895 | -13.63197571 |

### C<sup>-</sup>-PI\_front

|   |           |            |            |
|---|-----------|------------|------------|
| C | 0.3737370 | 0.1624040  | -0.1482370 |
| C | 0.0888330 | 0.0472830  | 1.2402130  |
| C | 1.7683480 | -0.0006770 | -0.3269500 |
| C | 2.3499270 | -0.2475730 | 0.9429430  |
| C | 3.4040840 | -0.3906260 | 1.1429100  |
| C | 1.3078370 | -0.2044960 | 1.1918650  |
| C | 0.5467460 | -4.3285470 | 2.02       |

|   |             |              |             |   |             |              |              |   |             |              |             |   |             |              |              |
|---|-------------|--------------|-------------|---|-------------|--------------|--------------|---|-------------|--------------|-------------|---|-------------|--------------|--------------|
| H | 1.17488300  | -10.31135100 | -5.02749200 | H | 1.52254200  | -10.21768500 | -5.34091600  | H | 1.74832400  | -10.15970900 | -5.19971000 | C | -1.01596000 | -12.40912100 | -12.55330100 |
| C | 1.016697400 | -8.30437300  | -7.70255600 | C | -0.41110600 | -8.46300700  | -7.68688800  | C | 0.30093400  | -8.05064800  | -7.60401500 | H | -3.09149200 | -13.06989900 | -12.63530900 |
| H | -1.92385200 | -9.00124800  | -7.33322400 | H | -2.20571000 | -9.10335400  | -6.61982100  | H | -1.69976800 | -8.69240200  | -7.01618800 | H | -2.81154000 | -11.49734200 | -13.39066700 |
| H | -1.84196000 | -7.40769900  | -8.99134000 | H | -2.40071100 | -7.57627100  | -7.49489300  | H | -1.63896400 | -7.03586000  | -7.63850300 | H | -1.06123600 | -14.51430900 | -12.08662300 |
| H | 0.19977200  | -10.41901300 | -7.28320600 | H | -0.15633300 | -10.53238600 | -7.12730700  | H | 0.36100500  | -10.18340800 | -7.25436600 | H | 0.48848300  | -13.74515900 | -11.77833300 |
| H | 1.76708000  | -9.62447900  | -7.31388800 | H | 1.30069300  | -9.76711100  | -7.74700600  | H | 1.93223000  | -9.44651500  | -7.52736500 | H | -0.47879500 | -11.50523400 | -12.24225600 |
| H | 0.69027300  | -7.39799900  | -7.50175100 | H | 0.18827500  | -7.54704300  | -7.76115500  | H | 0.93421600  | -7.17015400  | -7.46151900 | H | -0.72034000 | -12.60563800 | -13.59032000 |
| H | 0.16185300  | -8.47774100  | -8.78370200 | H | -0.70915400 | -8.72621200  | -8.70770300  | H | 0.17080500  | -8.18139700  | -8.68341900 | O | -2.92842700 | -11.95854300 | -10.09690600 |
| O | -1.21872000 | -7.94239100  | -4.86674200 | O | -0.77343300 | -7.84612200  | -4.62561700  | O | -0.65121300 | -7.83802900  | -4.59051300 | C | -2.99989800 | -11.36729500 | -11.31086600 |
| C | -1.56681300 | -7.32721800  | -6.01923800 | C | -1.44115800 | -7.35335600  | -5.64699300  | C | -1.09556200 | -7.21883200  | -5.62990500 | O | -3.41585400 | -10.22636200 | -11.36227100 |
| O | -2.00977100 | -6.19796800  | -5.94797000 | O | -1.83734800 | -6.17919000  | -5.57592700  | O | -1.59588300 | -6.05814600  | -5.45929900 | B | 5.88818700  | -3.15809100  | -4.86785500  |
| B | 5.73642600  | -3.11910000  | -4.86851200 | B | 5.76540300  | -3.12041300  | -4.86654200  | B | 5.74738300  | -3.24383500  | -4.85918100 | C | 7.46187400  | -3.66495400  | -4.85964900  |
| F | 7.29690000  | -3.74127800  | -4.68758500 | F | 7.29988000  | -3.72622300  | -4.70885400  | F | 7.28123700  | -3.85910600  | -4.74174000 | C | 7.89214200  | -4.99168300  | -4.92361400  |
| C | 7.62763700  | -5.09729600  | -4.70326400 | C | 7.64756300  | -5.07750400  | -4.74915900  | C | 7.61512300  | -5.21299600  | -4.80195900 | C | 8.49272500  | -2.72451900  | -4.95467100  |
| C | 8.41055100  | -2.89365000  | -4.69149400 | C | 8.40349800  | -2.86525100  | -4.70892300  | C | 8.39230400  | -3.00850500  | -4.76742900 | C | 9.23182800  | -5.36531300  | -5.03702600  |
| C | 8.93565300  | -5.58434300  | -4.69320000 | C | 8.96134200  | -5.54885300  | -4.75785800  | C | 8.92310200  | -5.69713300  | -4.84733000 | C | 9.84045700  | -3.04803000  | -5.06671700  |
| C | 9.73181000  | -3.32804300  | -4.67940300 | C | 9.72994300  | -3.28395500  | -4.71476900  | C | 9.71425900  | -3.44008500  | -4.80999700 | C | 10.21603400 | -4.38777600  | -5.10818300  |
| O | 10.00314400 | -4.69343400  | -4.67956000 | O | 10.01526200 | -4.64569300  | -4.73865100  | O | 9.98597800  | -4.80416200  | -4.84906300 | C | 4.80883100  | -3.26028000  | -3.66878800  |
| C | 4.59102500  | -4.23952400  | -4.49449300 | C | 4.61094600  | -4.27306700  | -4.50510200  | C | 4.59317600  | -4.37334100  | -4.43571900 | C | 5.03683000  | -5.01081800  | -3.16952500  |
| C | 4.54745500  | -4.81483300  | -3.22033300 | C | 4.56388600  | -4.84373400  | -3.22841000  | C | 4.62716800  | -4.97382300  | -3.17020800 | C | 3.57349000  | -4.60582600  | -4.95772800  |
| C | 3.52732000  | -4.61938400  | -5.31616000 | C | 3.58654600  | -4.70559900  | -5.34943100  | C | 3.68189100  | -4.72941800  | -5.19975500 | C | 4.13439400  | -5.90784800  | -2.59174300  |
| C | 3.56403000  | -5.69030000  | -2.77182200 | C | 3.60945000  | -5.75893100  | -2.79611100  | C | 3.66845600  | -5.85780100  | -2.68195700 | C | 2.65020200  | -5.50169800  | -4.41866000  |
| C | 2.51722800  | -5.49303600  | -4.90722600 | C | 2.61375800  | -5.62677300  | -4.95897400  | C | 2.49839100  | -5.60432900  | -4.74332800 | C | 2.91956600  | -6.14780800  | -3.22232800  |
| C | 2.52464300  | -6.02952900  | -3.62906300 | C | 2.61431300  | -6.15659400  | -3.67879800  | C | 2.57883300  | -6.17059700  | -3.48343600 | C | 5.56059400  | -1.95416900  | -3.76021600  |
| C | 5.42929400  | -1.87183700  | -3.79837300 | C | 5.41522800  | -1.89271000  | -3.77868700  | C | 5.42839800  | -2.00136300  | -3.78036300 | C | 4.37286500  | -1.22058200  | -3.85021000  |
| C | 4.28272800  | -1.09344600  | -3.98633900 | C | 4.26769600  | -1.11097000  | -3.95228400  | C | 4.27972300  | -1.21533900  | -3.93662700 | C | 6.30559200  | -1.68422500  | -2.60643200  |
| C | 6.12993800  | -1.55070600  | -2.62774600 | C | 6.12258800  | -1.58791900  | -2.60805700  | C | 6.16239900  | -1.69114700  | -2.62810900 | C | 3.96495100  | -0.26770900  | -2.92632600  |
| C | 3.87559600  | -0.06262300  | -3.14390500 | C | 3.87552000  | -0.08429500  | -3.09698200  | C | 3.91199000  | -0.17535600  | -3.08951900 | C | 5.92076600  | -0.75264700  | -1.63827900  |
| C | 5.75679100  | -0.52968700  | -1.75116700 | C | 5.75703900  | -0.57910000  | -1.714499800 | C | 5.82602300  | -0.66576500  | -1.74294800 | C | 4.74611600  | -0.03336300  | -1.80042500  |
| C | 4.62223600  | 0.22648400   | -2.01120100 | C | 4.62487000  | 0.18454900   | -1.96134300  | C | 4.69725000  | 0.10683400   | -1.97745000 | F | 11.50838300 | -4.72781100  | -5.21820900  |
| F | 11.26613400 | -5.14015700  | -4.67099600 | F | 11.28681900 | -5.07707700  | -4.74833800  | F | 11.25278100 | -5.24793300  | -4.89478000 | F | 10.77675000 | -2.08843300  | -5.14018600  |
| F | 10.74753700 | -2.44744800  | -4.67180000 | F | 10.73543700 | -2.39149200  | -4.70250800  | F | 10.72842600 | -2.55727800  | -4.82074300 | F | 8.19490900  | -1.40547700  | -4.93838600  |
| F | 8.23435600  | -1.55085300  | -4.70202900 | F | 8.21216800  | -1.52508200  | -4.69813200  | F | 8.21419300  | -1.66698000  | -4.75133400 | F | 7.01142500  | -1.60572100  | -4.87850000  |
| F | 6.66467500  | -6.05157800  | -4.74329700 | F | 6.69699400  | -6.04480600  | -4.79828900  | F | 6.65317000  | -6.17072200  | -4.83716000 | F | 9.57531400  | -6.63460500  | -5.08295700  |
| F | 9.17164500  | -6.90858000  | -4.70381400 | F | 9.21293900  | -6.87047100  | -4.79263000  | F | 9.16094200  | -7.02135900  | -4.89872100 | F | 3.16828800  | -6.99306000  | -6.08959700  |
| F | 3.38888100  | -4.14571700  | -6.61087000 | F | 3.45848600  | -4.24711700  | -6.61083900  | F | 3.27216900  | -4.24329500  | -6.44064700 | F | 1.46395300  | -5.72051400  | -5.04279600  |
| F | 1.47932200  | -5.78334800  | -5.73345100 | F | 1.61644400  | -5.98339500  | -5.81841800  | F | 1.40696600  | -5.88263600  | -5.52831600 | F | 2.00623200  | -6.96633000  | -2.66230000  |
| F | 1.53025700  | -6.84543400  | -3.22595900 | F | 1.65627000  | -7.02651200  | -3.29658000  | F | 1.60936700  | -7.00211600  | -3.04246400 | F | 4.40013400  | -6.49649100  | -1.41426900  |
| F | 3.58373300  | -6.18014100  | -1.51500900 | F | 3.61989100  | -6.23984300  | -1.53799100  | F | 3.75850200  | -6.38148800  | -1.44772200 | F | 6.15930300  | -4.78927600  | -6.22647900  |
| F | 5.50217700  | -4.50187400  | -2.31213800 | F | 5.48773300  | -4.49395000  | -2.30570000  | F | 5.63924200  | -4.69211900  | -2.32605900 | F | 3.51983500  | -1.43291500  | -4.88243900  |
| F | 3.43069200  | -1.34759000  | -5.01506000 | F | 3.41278700  | -1.34845200  | -4.98059600  | F | 3.40311000  | -1.45923300  | -4.94455700 | F | 2.79470000  | -0.39962800  | -3.07555000  |
| F | 2.72635700  | 0.61367000   | -3.38280500 | F | 2.73590700  | 0.61194600   | -3.32621700  | F | 2.77540700  | 0.52529300   | -3.29752100 | F | 4.34263200  | -0.84224200  | -0.85636900  |
| F | 4.22713500  | 1.19215900   | -1.15546200 | F | 4.23687000  | 1.13985800   | -1.09231100  | F | 4.34587200  | 1.08389000   | -1.11763100 | F | 6.64609000  | -0.57813000  | -0.51930900  |
| F | 6.45469900  | -0.30289500  | -0.61543300 | F | 6.45430600  | -0.36922800  | -0.58131000  | F | 6.44893700  | -0.44620000  | -0.62862500 | F | 5.49825600  | -2.33479700  | -2.34123900  |
| F | 7.21376100  | -2.24865700  | -2.24723400 | F | 7.21094500  | -2.29014500  | -2.24609900  | F | 7.25352600  | -2.39821300  | -2.28301500 | C | 5.62529100  | -3.64966600  | -7.45243900  |
| C | 5.73322900  | -2.58027300  | -6.41932300 | C | 5.70493200  | -2.56216700  | -6.41010300  | C | 5.64814200  | -2.71409900  | -6.41125700 | C | 5.72484200  | -1.37033200  | -6.91141300  |
| H | 6.52727800  | -1.83800500  | -6.56957800 | H | 6.47212000  | -1.79001900  | -6.55015000  | H | 6.43619700  | -1.97213200  | -6.59387500 | C | 5.56793500  | -3.35897100  | -8.81119900  |
| H | 5.93033500  | -3.39942800  | -7.12314500 | H | 5.92828500  | -3.36243500  | -7.12777700  | H | 5.81965500  | -3.53528000  | -7.12048600 | C | 5.67036500  | -1.02964400  | -8.26381800  |
| H | 4.79246600  | -2.11620600  | -6.72337100 | H | 4.74722300  | -2.12621800  | -6.70290900  | H | 4.69685700  | -2.24982300  | -6.67890300 | C | 5.59053900  | -2.03024000  | -9.22375400  |

1-TSI\_front\_up

|    |             |             |            |    |             |             |             |    |             |             |             |    |             |             |             |
|----|-------------|-------------|------------|----|-------------|-------------|-------------|----|-------------|-------------|-------------|----|-------------|-------------|-------------|
| C  | -0.18835500 | 0.08502400  | 0.07185300 | C  | -0.25780200 | -0.16973500 | 1.46627800  | C  | -0.12653300 | 0.52637400  | -0.23249300 | C  | 1.87614700  | 0.52881800  | 0.96992400  |
| C  | 2.91187000  | 0.82428700  | 1.06164600 | H  | 3.21668700  | 0.78472900  | 1.11409000  | H  | 3.21668700  | 0.78472900  | 1.11409000  | H  | 3.21668700  | 0.78472900  | 1.11409000  |
| C  | 1.02004300  | 0.09480000  | 2.02207000 | C  | 2.17306400  | -3.73728900 | 1.66132900  | C  | 2.17306400  | -3.73728900 | 1.66132900  | C  | 2.17306400  | -3.73728900 | 1.66132900  |
| C  | 2.43321100  | -3.63864000 | 2.07898000 | C  | 3.02485800  | -2.65297900 | 1.99648000  | C  | 3.02485800  | -2.65297900 | 1.99648000  | C  | 3.02485800  | -2.65297900 | 1.99648000  |
| C  | 3.12696100  | -2.41436200 | 2.25954300 | C  | 2.31128700  | -3.99121400 | 0.27133000  | C  | 2.31128700  | -3.99121400 | 0.27133000  | C  | 2.31128700  | -3.99121400 | 0.27133000  |
| C  | 2.71844600  | -4.11395200 | 0.77055700 | C  | 3.70155400  | -2.24276600 | 0.81195700  | C  | 3.70155400  | -2.24276600 | 0.81195700  | C  | 3.70155400  | -2.24276600 | 0.81195700  |
| C  | 3.84274100  | -2.13167700 | 1.05965700 | C  | 3.26215700  | -3.07612900 | -0.24760200 | C  | 3.26215700  | -3.07612900 | -0.24760200 | C  | 3.26215700  | -3.07612900 | -0.24760200 |
| Zr | 1.36151600  | -1.93238600 | 0.48970900 | Zr | 1.23378800  | -1.66687000 | 0.46523000  | Zr | 1.23378800  | -1.66687000 | 0.46523000  | Zr | 1.23378800  | -1.66687000 | 0.46523000  |
| C  | -0.41157600 | -3.13333500 | 1.24225200 | C  | -0.61644900 | -2.70184700 | 1.33541800  | C  | -0.61644900 | -2.70184700 | 1.33541800  | C  | -0.61644900 | -2.70184700 | 1.33541800  |
| H  | -0.56729600 | -3.07993100 | 2.37927000 | H  | -0.65609300 | -2.76270200 | 2.40988100  | H  | -0.65609300 | -2.76270200 | 2.40988100  | H  | -0.65609300 | -2.76270200 | 2.40988100  |
| H  | -1.33097300 | -2.77861000 | 1.08535200 | H  | -1.51403700 | -2.16538100 | 0.99868400  | H  | -1.51403700 | -2.16538100 | 0.99868400  | H  | -1.51403700 | -2.16538100 | 0.99868     |

|   |             |              |              |   |             |              |             |   |             |              |             |   |             |             |              |
|---|-------------|--------------|--------------|---|-------------|--------------|-------------|---|-------------|--------------|-------------|---|-------------|-------------|--------------|
| H | -1.16472300 | -9.40644200  | -3.50202700  | H | 2.83051800  | -2.86091300  | 2.75956400  | H | -0.98638600 | -0.19887700  | 2.32350100  | O | 0.20534600  | -1.98793200 | -2.16033700  |
| H | -1.03744900 | -8.02072800  | -7.17607600  | H | 1.30375300  | -0.65797300  | 3.22549500  | H | 1.44159400  | -4.39376900  | 2.24025400  | O | 0.42566900  | -3.09275600 | -1.51520400  |
| C | 0.90435900  | -9.49664100  | -6.32029600  | C | -0.06530900 | -8.95314900  | -4.16475700 | H | 1.65951700  | -4.78989200  | -0.42250100 | O | 0.59325100  | -2.98890500 | -0.27341700  |
| H | 1.07018100  | -8.53016100  | -4.36880700  | C | 0.92327500  | -9.25201100  | -5.28540400 | H | 3.46820000  | -3.05699300  | -1.37219800 | H | -2.45385400 | -7.64014600 | -13.51874400 |
| H | 0.87678300  | -10.27679800 | -4.31024900  | H | -0.85384300 | -9.70993800  | -4.08466100 | H | 4.36274400  | -1.56405400  | 0.67082800  | H | -2.09539100 | -2.55869800 | 3.39664500   |
| C | 0.48334600  | -8.30363700  | -7.18816200  | H | 0.44468900  | -8.87112000  | -3.20700200 | H | 3.08932800  | -2.37337200  | 2.91056800  | H | 2.69840500  | -2.59687400 | 3.99657200   |
| H | -1.59218600 | -8.96440500  | -7.27017000  | C | -1.87455100 | -8.33261300  | -6.35371700 | H | 1.55050400  | -0.16331300  | 3.21550300  | H | 3.46622400  | -3.47036400 | 1.57253300   |
| H | -1.31223400 | -7.39185800  | -8.02552800  | C | 0.28667800  | -9.73470800  | -6.59585600 | C | 0.03700800  | -9.10958500  | -4.69397400 | H | 3.17855000  | -1.44058900 | -0.91751900  |
| H | 0.43870700  | -10.40882500 | -6.72148400  | H | 1.53074500  | -8.35508400  | -5.44738700 | H | 1.29590600  | -9.12948500  | -5.54571200 | H | 2.21689100  | 0.68089400  | 1.16026200   |
| H | 1.98778900  | -9.63967500  | -6.41319400  | H | 1.60420100  | -10.02688700 | -4.91162900 | H | -0.71894900 | -9.82826500  | -5.02675800 | H | 1.92028100  | -0.03066000 | 3.74804500   |
| H | 1.02051100  | -7.39975000  | -8.87711700  | C | -0.67583600 | -8.73433600  | -7.24916000 | H | 0.26458900  | -9.28114800  | -3.64356600 | H | -0.77420600 | -0.28861700 | 3.98731600   |
| H | 0.77900200  | -8.50015400  | -8.22581800  | H | -2.30293300 | -9.22491600  | -5.87842800 | C | -1.06183600 | -7.69450700  | -7.06544300 | C | -2.74029000 | 5.22368000  | -11.14997900 |
| O | -1.42911200 | -7.85305900  | -4.73176700  | C | -2.65785100 | -7.86276000  | -6.95166700 | H | 1.07078100  | -9.15208400  | -7.06359000 | C | -3.61534700 | 4.16529200  | -11.80123000 |
| C | -1.50059200 | -7.26181100  | -9.95747700  | H | -0.25115800 | -10.67558000 | -6.40816200 | H | 1.92898400  | -8.28789400  | -5.25197100 | H | -2.73583600 | 6.15893500  | -11.72473800 |
| O | -1.91654800 | -6.12087800  | -5.99713200  | H | 1.08318000  | -9.97359700  | -7.30993800 | H | 1.83544700  | -10.03887500 | -5.25085600 | H | -3.10788700 | 5.44560900  | -10.14775400 |
| B | 5.88818700  | -3.15809100  | -4.86785500  | H | -0.13665200 | -7.82972300  | -7.55789700 | C | 0.36746500  | -7.91175600  | -7.62661300 | C | -0.97232600 | 4.17655100  | -13.36631100 |
| C | 7.46187400  | -3.66495400  | -4.85964900  | H | -1.08704400 | -9.17659500  | -8.16326400 | H | -1.61452000 | -8.64479000  | -7.08094500 | C | -3.47185600 | 4.05511000  | -13.32430300 |
| C | 7.89214200  | -4.99168300  | -4.92361400  | O | -0.69648600 | -7.63962600  | -4.29408800 | H | -1.61328700 | -6.97687400  | -7.67605800 | H | -3.38722200 | 3.19947400  | -11.32010000 |
| C | 8.49272500  | -2.72451900  | -4.95467100  | C | -1.49649200 | -7.32782300  | -5.29318000 | H | 0.49373200  | -10.04920800 | -7.33181300 | H | -4.65558700 | 3.38790000  | -11.54311700 |
| C | 9.23182800  | -5.36531300  | -5.03702600  | O | -1.92625100 | -6.16586700  | -5.36020700 | H | 2.04395200  | -9.25349500  | -7.55626000 | C | -2.05825000 | 3.70756100  | -13.80880400 |
| C | 0.84045700  | -3.04840300  | -5.06671700  | B | 5.99326500  | -3.10775200  | -4.84027500 | H | 0.96633000  | -7.01333400  | -7.44832500 | H | -1.33596600 | 5.74206100  | -13.51872200 |
| C | 10.21603400 | -4.38776700  | -5.10818200  | C | 7.57411800  | -3.59893200  | -4.82207200 | H | 0.26309500  | -8.01618500  | -8.71152400 | H | -0.07226200 | 4.59288800  | -13.97260400 |
| C | 4.80883100  | -4.32620800  | -4.36878800  | C | 8.02314600  | -4.91705400  | -4.87347800 | O | -0.62806200 | -7.78655700  | -4.63354400 | H | -3.77812400 | 5.01107800  | -13.77640200 |
| C | 5.03063800  | -5.01081800  | -3.16695200  | C | 8.59513600  | -2.64373700  | -4.86614800 | C | -1.08362200 | -7.16796600  | -5.66451500 | H | -4.17246100 | 3.30002000  | -13.70087600 |
| C | -1.54593900 | -4.60582600  | -4.95727800  | C | 9.36933000  | -5.27074300  | -5.02321000 | O | -1.61654100 | -6.02288000  | -5.48614300 | H | -1.78221400 | 2.70329000  | -13.46473100 |
| C | 4.13439400  | -5.90784800  | -2.59174300  | C | 9.94876600  | -2.94762300  | -4.96296000 | B | 5.80545200  | -3.27342800  | -4.89002500 | H | -2.05059700 | 3.67409800  | -14.90429300 |
| C | 1.62050200  | -5.50169800  | -4.41866000  | C | 10.34236800 | -4.28000900  | -5.04194400 | C | 7.35038400  | -3.85894700  | -4.78045200 | H | -1.37473500 | 4.79474800  | -11.91997400 |
| C | 2.91956600  | -6.14780800  | -3.22232800  | C | 4.92277900  | -4.31175200  | -4.41405600 | C | 7.72055400  | -5.20489100  | -4.77246100 | O | -0.51682400 | 4.53446600  | -11.92848000 |
| C | 5.56059400  | -1.95416900  | -3.76021600  | C | 5.12931000  | -5.04662500  | -3.32900300 | C | 8.43006500  | -2.97222100  | -4.85595000 | O | 0.59966000  | 4.14383300  | -11.64236100 |
| C | 4.37286500  | -1.22058200  | -3.85021000  | C | 3.71856300  | -4.60355400  | -5.05756200 | B | 9.04460800  | -5.64450700  | -4.79974600 | B | -5.46467800 | -4.00002000 | -2.37661000  |
| C | 6.30559200  | -1.68425200  | -2.60643200  | C | 4.25547800  | -6.01288200  | -2.74592300 | C | 9.74653000  | -3.36225700  | -4.88327100 | C | -4.75699000 | -5.03660400 | -1.27566300  |
| C | 3.96495100  | -0.26770900  | -2.92392600  | C | 2.82567900  | -5.57375300  | -4.60702700 | C | 10.07743200 | -4.71798100  | -4.85409900 | C | -5.38270200 | -6.13328500 | -0.97421500  |
| C | 9.09276600  | -0.75264700  | -1.68327900  | C | 3.08280100  | -6.27816600  | -3.44216600 | C | 4.64830300  | -4.38711300  | -4.45051800 | C | -3.41362200 | -4.90445500 | -0.91923200  |
| C | 4.74611600  | -0.03336300  | -1.80042500  | C | 5.63474800  | -1.95035000  | -3.69827500 | C | 4.74774100  | -5.04201200  | -3.21572600 | C | -4.74543600 | -7.00544600 | -0.14286300  |
| F | 11.50838300 | -4.72781100  | -5.21820900  | C | 4.44709800  | -1.21589400  | -3.78694700 | C | 6.46578200  | -4.65682900  | -5.14031900 | F | -2.74289700 | -5.07310700 | -0.02941300  |
| F | 10.77675000 | -2.08843300  | -5.14018600  | C | 6.35842000  | -1.71885700  | -2.52351000 | C | 3.79491200  | -5.91957400  | -2.70420200 | C | -3.41215000 | -6.80528500 | 0.54695700   |
| F | 8.19490900  | -1.40547700  | -4.93838600  | C | 4.02564500  | -0.28854300  | -2.84040300 | C | 2.49872000  | -5.53875300  | -4.66826800 | F | -5.27382100 | -2.40841100 | -1.94846300  |
| F | 7.01142500  | -6.01572100  | -4.87850000  | C | 5.95749900  | -0.81823200  | -1.53390900 | C | 2.64655500  | -6.16922400  | -3.44539500 | C | -5.51438200 | -1.37841900 | -2.86587500  |
| F | 9.57531400  | -6.66346500  | -5.08295700  | C | 4.78813800  | -0.09058400  | -1.69676600 | C | 5.46950900  | -2.03752700  | -3.82810500 | C | -5.05513400 | -1.94275700 | -0.65049000  |
| F | 3.16828800  | -3.99300600  | -6.08975900  | F | 11.64108100 | -4.60073300  | -5.13869900 | C | 4.30017700  | -1.28416500  | -3.98279000 | C | -5.47562700 | -0.02293600 | -2.55726100  |
| F | 1.46395300  | -5.72051400  | -5.04279600  | F | 6.01347600  | -1.97455800  | -4.98708900 | C | 6.18347600  | -1.74533900  | -2.66170400 | C | -5.00732100 | -5.91519700 | -0.28857900  |
| F | 2.00623300  | -6.96637100  | -2.66203000  | F | 8.28170700  | -1.32977300  | -4.81344300 | C | 3.88643500  | -0.28736900  | -3.10609800 | C | -5.21398800 | 0.38166800  | -1.25298900  |
| F | 4.40013400  | -6.49649100  | -1.41426900  | F | 7.15576400  | -5.95415800  | -4.93284200 | C | 5.79722900  | -0.76262200  | -1.74766800 | F | -2.78219300 | -7.62010300 | 1.40617200   |
| F | 6.15903300  | -4.78927600  | -2.46647900  | F | 9.72985200  | -6.56296000  | -5.10730100 | C | 4.64663600  | -0.02238600  | -1.97421700 | F | -1.44431900 | -5.49679900 | -0.29738400  |
| F | 3.31893500  | -1.43291500  | -4.88243800  | F | 3.32161900  | -3.94450900  | -6.16664400 | F | 11.35609700 | -5.12242700  | -4.88245700 | F | -2.67108600 | -3.86871200 | -1.42373100  |
| F | 2.79470000  | 0.39666800   | -3.07555000  | F | 1.67891000  | -5.82187800  | -5.29911200 | F | 10.74874100 | -2.45017500  | -4.94374200 | F | -6.67609000 | -6.41662500 | -0.90791900  |
| F | 4.34263200  | 0.84224200   | -0.85636900  | F | 2.20224200  | -7.19448800  | -2.98478600 | F | 8.19765000  | -1.64203800  | -4.90797200 | F | -5.41413600 | -0.03522600 | 0.75582900   |
| F | 6.64609900  | -0.57813000  | -0.51930000  | F | 4.51577800  | -6.66803300  | -1.60425500 | F | 6.79243500  | -6.18867600  | -4.74088200 | F | -5.79127200 | -1.67120000 | -4.15941900  |
| F | 7.44983500  | -2.33479700  | -2.34123900  | F | 6.22918000  | -4.82589300  | -2.49564900 | F | 3.32626100  | -6.95925600  | -4.78055300 | F | -5.66966000 | 0.19566600  | -3.51501200  |
| F | 5.68526700  | -2.68489800  | -6.44126000  | F | 3.61559500  | -1.39563200  | -4.84221900 | F | 9.16465000  | -4.06801100  | -6.31491300 | F | -1.59255500 | 1.68566600  | -0.93752500  |
| F | 5.62529100  | -3.64966600  | -7.45243900  | F | 2.86576800  | 0.38871100   | -2.99482700 | F | 1.36728800  | -5.76191700  | -5.40333100 | F | -4.75217600 | -0.23719800 | 0.98357600   |
| F | 5.72428400  | -1.37032300  | -6.91141300  | F | 4.37443700  | 0.76193400   | -0.73748500 | F | 1.68628600  | -7.00211700  | -2.98503400 | F | -4.85386400 | -2.80656800 | -0.37832400  |
| F | 5.56793500  | -3.35897100  | -8.81119900  | F | 6.66632300  | -0.67720400  | -0.40023900 | F | 3.95186400  | -6.49927600  | -1.50402100 | F | -4.70033800 | -4.40705700 | -3.81397700  |
| F | 0.60736500  | -1.02964600  | -8.26311800  | F | 7.49949800  | -2.37819700  | -2.26002100 | F | 5.81872400  | -4.82511000  | -2.42990500 | C | -5.00042900 | -5.61812500 | -4.45511900  |
| F | 5.59053900  | -2.03024000  | -9.22735400  | C | 5.81999700  | -2.58085600  | -6.40228400 | F | 2.348100700 | -1.51710100  | -5.03626900 | C | -3.70613000 | -3.67961500 | -4.46803100  |
| F | 4.49440000  | -4.34183100  | -7.24746900  | C | 5.79586700  | -3.50855300  | -7.44917500 | F | 7.40120900  | 0.39445700   | -3.31612100 | C | -4.43499400 | -6.03749900 | -5.65932000  |
| F | 5.61680300  | -4.96151200  | -7.12381400  | C | 5.85413400  | -1.24992700  | -6.82551000 | F | 4.24983800  | 0.90952200   | -1.08578700 | C | -3.11729800 | -4.50787000 | -5.63755400  |
| F | 5.69728900  | 0.25899200   | -8.64340700  | C | 5.76443900  | -3.17075100  | -8.79775500 | F | 6.89855000  | -0.55641000  | -0.61780700 | C | -3.48133600 | -5.24813100 | -6.28552500  |
| F | 5.53578600  | -1.72258400  | -10.52793900 | C | 5.82596200  | -0.86231500  | -8.16623600 | F | 7.29961000  | -2.41956400  | -2.33330600 | F | -4.78781400 | -7.20876100 | -6.21221000  |
| F | 5.81423200  | -0.32499100  | -6.05997800  | C | 5.77952900  | -1.82833800  | -9.16285900 | F | 5.72227100  | -2.82539400  | -6.83971700 | F | -5.87185900 | -4.48669700 | -3.92050800  |
|   |             |              |              |   |             |              |             |   |             |              |             |   |             |             |              |

|   |             |             |             |   |             |             |              |   |             |             |             |   |              |             |              |
|---|-------------|-------------|-------------|---|-------------|-------------|--------------|---|-------------|-------------|-------------|---|--------------|-------------|--------------|
| O | 0.59325100  | -2.98890500 | -0.27341700 | H | 0.76919600  | -4.53285600 | 3.75839100   | H | 3.81455800  | -3.41651800 | 1.83396300  | H | 2.31622600   | 0.66152300  | 1.21075700   |
| H | -2.45385400 | -2.64014600 | 0.73154400  | H | 2.77062100  | 0.02782500  | 2.47760600   | H | 3.48163400  | -1.06046100 | 0.58658200  | H | 2.01271400   | -0.04850500 | 3.79816700   |
| H | -2.09539100 | -2.55869800 | 3.39664500  | H | 2.42184800  | -0.35824200 | -0.16499900  | H | 2.23064900  | 0.61272200  | 2.28034300  | H | -0.68332600  | -0.27110500 | 4.05591300   |
| H | 2.69840500  | -2.59687400 | 3.99675200  | H | -0.18278500 | -0.04488400 | -0.718113500 | H | 1.78905300  | -0.71925200 | 4.58692800  | H | -2.79406000  | 5.20747400  | -1.12751900  |
| H | 3.46622400  | -3.47036400 | 1.57255300  | H | -1.46504600 | 0.54315000  | 1.56814700   | H | -0.91521000 | -1.37433700 | 4.51750300  | H | -3.68549200  | 4.14054900  | -1.90476600  |
| H | 3.17855000  | -1.44058900 | -0.17519400 | H | 0.37008300  | 0.57939200  | 3.55817300   | C | -3.79999000 | 0.37022100  | -6.22575000 | H | -3.27601800  | 6.12352100  | -1.87877000  |
| H | 2.21689100  | 0.68098400  | 1.16026200  | H | 0.28458300  | -2.16096100 | 4.92797100   | H | -4.57826200 | -0.67611800 | -6.98376800 | H | -3.16908900  | 5.46994300  | -10.28539200 |
| H | 1.92081000  | -0.03066000 | 3.74800400  | C | -2.89166000 | 0.52953800  | -6.02690900  | H | -3.62116800 | 1.28941300  | -6.79910600 | C | -1.00743100  | 4.59946000  | -13.44880200 |
| H | -0.77420600 | -0.28861700 | 3.98731600  | C | -3.91280400 | -0.26557900 | -6.82934200  | H | -4.23992000 | 0.60854200  | -5.27040900 | C | -3.52103900  | 3.98570200  | -13.42129600 |
| H | -3.09998600 | 1.12035300  | -5.64492400 | H | -2.56109000 | 1.43357600  | -6.51382000  | H | -1.65800100 | -0.46487700 | -8.12350300 | H | -3.48894900  | 3.19460300  | -11.38886800 |
| H | -3.97504300 | 0.05296500  | -6.29617500 | H | -3.29774400 | 0.81158300  | -5.05807700  | H | -4.19191900 | -0.86093400 | -8.45681000 | H | -4.72403000  | 4.40172400  | -11.67229200 |
| C | -3.09553200 | 2.05560800  | -6.21968300 | C | -1.01519600 | -0.47072800 | -8.02105200  | H | -4.53294100 | -1.61988400 | -6.43172200 | C | -2.10861800  | 3.58907000  | -13.87045900 |
| C | -3.46758300 | 1.34228200  | -4.64269900 | C | -3.58228200 | -0.43420700 | -8.31804200  | H | -5.62311900 | -0.34734800 | -6.92077600 | H | -1.34757700  | 5.61729700  | -13.64165400 |
| C | -1.33202200 | 0.61322400  | -7.86125600 | H | -4.05654500 | -1.23454900 | -6.33990800  | H | -4.20957000 | -1.38315500 | -8.68907000 | H | -0.10231800  | 4.62278000  | -14.03809800 |
| C | -3.83155200 | -0.04781600 | -7.81924800 | H | -4.86738900 | 0.26629100  | -6.73108000  | H | -1.84978800 | 0.57497300  | -8.42779400 | H | -3.79684100  | 4.93270700  | -13.90928700 |
| H | -3.74691800 | -0.90385300 | -5.81504500 | C | -2.26679500 | -1.16931300 | -8.60616300  | H | -0.68230400 | -0.75019300 | -8.52189000 | H | -4.23387200  | 3.23493800  | -13.78383400 |
| H | -5.01528300 | 0.28046300  | -6.03806200 | H | -1.06559900 | 0.60948700  | -8.21595900  | H | -4.31561800 | 0.09599400  | -8.98511800 | H | -1.85991800  | 2.59275800  | -13.48489000 |
| C | -2.41794600 | -0.39576600 | -8.30374900 | H | -0.10775800 | -0.85063800 | -8.49469800  | H | -4.89780000 | -1.55954600 | -8.92001000 | H | -2.09014100  | 3.51434800  | -14.96431000 |
| H | -1.69566200 | 1.63873400  | -8.01366700 | H | -3.54646700 | 0.55817500  | -8.79176800  | H | -2.64755300 | -2.38827300 | -8.27523100 | O | -1.44225200  | 4.75453700  | -11.01214600 |
| H | -0.43195800 | 0.48956100  | -8.46754900 | H | -4.40234500 | -0.97605500 | -8.80399600  | H | -2.58603700 | -1.46005000 | -9.76639500 | O | -0.57496000  | 4.44881400  | -11.99595200 |
| H | -1.17828000 | 0.90774300  | -8.27134700 | H | -2.31179500 | -2.19824200 | -8.23255100  | O | 0.53072000  | -0.09743000 | -5.80463600 | O | 0.53072000   | 4.04910900  | -11.68493300 |
| H | -4.53215700 | -0.80332500 | -8.19582100 | H | -2.12401800 | -1.23385000 | -9.69078600  | H | -1.52266300 | -0.47068800 | -6.62983000 | B | -5.51227000  | -3.90116800 | -2.41360300  |
| H | -2.14191000 | -1.40003200 | -7.95967600 | O | -1.70311800 | -0.24255300 | -5.65700300  | O | -0.38095900 | -0.82679300 | -6.16286300 | C | -8.80798400  | -4.97747300 | -3.85630700  |
| H | -2.41749300 | -0.42922900 | -9.39986800 | O | -0.83535600 | -0.69666100 | -6.53830000  | B | -5.43647500 | -3.72793000 | -2.38280200 | C | -5.40048700  | -6.15012300 | -0.87444300  |
| O | -1.43343100 | 0.69142100  | -5.41491900 | O | 0.14838800  | -1.32675500 | -6.12310800  | C | -4.80558900 | -4.83939100 | -1.31969000 | C | -3.47914700  | -4.82357400 | -0.95510600  |
| O | -0.87652000 | 0.43113900  | -6.42342500 | B | -5.46686000 | -3.39236200 | -2.29415000  | C | -5.51296500 | -5.87617800 | -0.70570500 | C | -4.57671600  | -7.05773100 | -0.02792900  |
| O | 0.23996400  | 0.04056000  | -6.13706600 | C | -5.06360700 | -4.68114700 | -1.13200100  | C | -3.43961400 | -4.84858000 | -1.02681300 | C | -2.80688600  | -5.68827000 | -0.10156400  |
| B | -5.46467800 | -4.00500200 | -2.37961000 | H | -5.96366200 | -5.60811600 | -0.78801700  | C | -4.92380400 | -6.82774100 | 0.13252400  | C | -3.44780100  | -6.82543200 | 3.01725800   |
| C | -4.75699000 | -5.03660400 | -1.27566300 | C | -3.72655800 | -4.96683000 | -1.02834600  | C | -2.80968700 | -5.76263200 | -0.19598300 | C | -7.16551300  | -3.98892100 | 2.46751900   |
| C | -5.38270200 | -6.13382500 | -0.67421500 | H | -5.57875200 | -6.71655000 | -0.02712300  | C | -3.56045200 | -6.77438500 | 0.39382800  | C | -7.90441000  | -3.94788300 | -1.28031800  |
| C | -3.41362200 | -4.90445500 | -0.91923200 | C | -3.29692400 | -6.05042100 | -0.27361100  | C | -5.12028200 | -2.16155400 | -1.91407100 | C | -7.94722300  | -3.94402000 | -3.62421900  |
| C | -4.74543600 | -7.00544600 | 0.21486300  | C | -4.23419300 | -6.94186600 | 0.23769100   | C | -5.28445900 | -1.09022200 | -2.79552400 | C | -9.29316100  | -3.90873900 | -1.22095500  |
| C | -2.74289700 | -5.73190700 | -0.02941300 | C | -4.79282500 | -1.97209100 | -1.74261100  | C | -4.85975200 | -1.75270200 | -6.60271400 | C | -9.34222000  | -3.90755000 | -3.61498600  |
| C | -3.41215000 | -6.80528500 | 0.54695700  | C | -4.67425200 | -0.83963400 | -2.55474600  | C | -5.15491300 | 0.24856900  | -2.44843200 | C | -10.02379600 | -3.88781000 | -2.40499300  |
| C | -5.27382100 | -2.40841100 | -1.94846300 | C | -4.47322300 | -1.71828400 | -0.40689300  | C | -5.28718900 | -0.42145400 | -0.20184200 | C | -5.28718900  | -2.31119700 | -1.97759000  |
| C | -5.14382000 | -1.37841900 | -2.86587500 | C | -4.21930500 | 0.40233400  | -2.12269800  | C | -4.86340200 | 0.59698200  | -1.13519200 | C | -5.54091300  | -1.28638400 | -2.89700900  |
| C | -5.05134000 | -1.94275700 | -0.65049000 | C | -0.41582700 | -0.49264200 | 0.07472900   | F | -2.97905000 | -0.67524200 | 1.19889500  | C | -5.00798500  | -1.84841000 | -0.69039300  |
| C | -5.47652700 | -0.02293600 | -2.55726100 | C | -3.86962100 | 0.58220900  | -0.78946100  | C | -4.18281600 | -5.67370400 | 0.05282300  | C | -5.46509000  | 0.06968200  | -2.60003000  |
| C | -5.00973100 | -0.59519700 | -0.28887900 | F | -3.84317200 | -7.99482600 | 0.97025700   | F | -2.63407100 | -3.87528300 | -1.54397800 | C | -4.92604000  | -0.96857000 | -0.34381100  |
| C | -5.21398800 | 0.38166800  | -1.25298900 | F | -1.97981300 | -6.24434200 | -0.01423100  | F | -6.84118700 | -6.01762300 | -0.87868800 | C | -5.14795100  | 0.47503700  | -1.30804000  |
| F | -2.78219300 | -7.62010300 | 1.40617200  | F | -2.74607600 | -4.13602400 | -1.48123300  | F | -5.66734800 | -7.79638500 | 0.69151600  | F | -2.81299800  | -7.67518900 | -1.19028500  |
| F | -1.44431900 | -5.49679900 | 0.29738400  | F | -7.29111700 | -5.48062200 | -0.97203200  | F | -5.57802400 | -1.31837900 | -4.10870200 | F | -1.52965100  | -5.42564400 | 0.28063700   |
| F | -2.67108600 | -3.86872200 | -1.42391700 | F | -6.50028200 | -7.56539300 | 0.45501700   | F | -5.28989400 | 1.22052900  | -3.38615300 | F | -2.75195500  | -3.75882800 | -1.83551000  |
| F | -6.67600900 | -6.41662500 | -0.90719100 | F | -5.00329900 | -0.90658600 | -0.37159600  | F | -4.72592000 | 1.88474600  | -0.78251100 | F | -6.66077300  | -6.47992500 | -1.20323700  |
| F | -5.41413600 | -8.03522600 | 0.75582900  | F | -4.10027900 | 1.43491600  | -2.98780500  | F | -4.44688600 | -0.11804300 | 1.07647500  | F | -5.39870000  | -8.15499700 | 0.40238900   |
| F | -5.79127200 | -1.67120000 | -4.15941900 | F | -3.40220000 | 1.76046100  | 0.34573300   | F | -4.71757800 | -2.65658100 | 0.39247600  | F | -7.38278800  | -3.92890600 | -4.85135000  |
| F | -5.66966000 | 0.91096800  | -3.51501200 | F | -3.68871500 | -0.34633600 | 1.37931500   | C | -4.69941600 | -4.14946400 | -3.82984100 | F | -10.02919200 | -3.87095600 | -4.76888100  |
| F | -5.15925500 | 1.68566600  | -0.93752500 | F | -4.59190900 | -2.68465200 | 0.53726800   | C | -5.09568300 | -5.30928300 | -4.51276900 | F | -11.36348400 | -3.84630900 | -2.37669200  |
| F | -4.75217600 | -0.23719800 | 0.98357600  | C | -4.88813500 | -3.87294800 | -3.79065600  | C | -3.62888900 | -3.49587200 | -4.44085300 | F | -9.93145000  | -3.88240300 | -0.03490400  |
| F | -4.85386400 | -2.80656800 | 0.37832400  | C | -5.56863500 | -4.84851900 | -4.53465600  | C | -4.54562900 | -5.74983800 | -5.71879600 | F | -7.25912100  | -3.93491700 | -0.09152000  |
| C | -4.70033800 | -4.40705700 | -3.81397700 | C | -3.69578800 | -3.46603900 | -4.39030400  | C | -3.04065500 | -3.90792400 | -5.63239800 | F | -5.87045400  | -1.59171500 | -4.17232800  |
| C | -5.00042900 | -5.61812500 | -4.45511200 | C | -5.15570400 | -5.32818700 | -5.77924500  | C | -3.50509500 | -5.03279500 | -6.29660600 | F | -5.67365200  | 0.99966800  | -3.55598600  |
| C | -3.70613000 | -3.67961500 | -4.46803100 | C | -3.23740800 | -3.92416800 | -5.62218600  | F | -5.00540400 | -6.85695100 | -6.32081300 | F | -5.06598900  | 1.77808000  | -1.00369700  |
| C | -4.43499400 | -6.03749900 | -5.69939200 | C | -3.97490500 | -4.85500400 | -6.33898000  | F | -6.05648000 | -6.10370900 | -0.10409300 | C | -6.15527200  | -0.13496100 | 0.91369200   |
| C | -3.11729800 | -4.05078700 | -5.67375400 | F | -5.87993300 | -6.24784900 | -6.43473800  | F | -2.00189400 | -3.20303100 | -6.16956500 | C | -4.77280600  | -2.70796800 | 3.02882100   |
| C | -3.48133600 | -5.24183100 | -6.28555200 | F | -6.69222700 | -5.41661300 | -4.05550000  | F | -2.95769300 | -5.40609600 | -7.46552900 | C | -4.78211700  | -4.31764700 | -3.84836700  |
| F | -4.78781400 | -7.20876100 | -6.21221000 | F | -2.06191900 | -3.46766200 | -6.13356800  | F | -3.06900500 | -2.38332900 | -3.89491300 | C | -5.11817300  | -5.52290400 | -4.47904900  |
| F | -5.87185900 | -6.48676900 | -3.90305800 | F | -3.54879400 | -5.28691700 | -7.53637400  | C | -7.07243700 | -3.75354300 | -2.53517500 | C | -3.74332100  | -3.63555400 | -4.47695500  |
| F | -2.16276200 | -3.26713300 | -6.23618100 | F | -2.86725500 | -2.57666200 | -3.77664300  | C | -7.55772500 | -3.49259800 | -1.58573400 | C | -4.52812100  | -5.09132300 | -5.65017200  |
| F | -2.91342400 | -5.62168000 | -7.43995100 | F | -7.06892100 | -3.03557900 | -2.36207600  | H | -7.38976700 | -2.99958300 | -3.26878800 | C | -3.12929100  | -4.55774500 | -5.65422300  |
| F | -3.21685800 | -2.         |             |   |             |             |              |   |             |             |             |   |              |             |              |







|                                     |              |             |             |     |              |             |              |   |              |             |              |   |              |             |             |
|-------------------------------------|--------------|-------------|-------------|-----|--------------|-------------|--------------|---|--------------|-------------|--------------|---|--------------|-------------|-------------|
| H                                   | -13.56409100 | -2.08831400 | -2.12632000 | H   | -11.87413100 | 1.73748900  | -10.12190900 | H | -9.73781100  | 4.70307000  | -12.35251300 | O | -6.14223800  | 10.07681400 | -0.02634200 |
|                                     |              |             |             | C   | -11.00423600 | 1.86879200  | -10.77962800 | O | -7.72491200  | 4.25304600  | -9.66430300  | C | -5.40141000  | 10.96588000 | 2.63598600  |
|                                     |              |             |             | Zr  | -9.10735500  | 1.42848200  | -9.59020700  | C | -7.42946300  | 4.56416600  | -8.41235100  | H | -5.60634400  | 12.80450200 | 1.46577400  |
|                                     |              |             |             | H   | -11.16848100 | 1.25147100  | -11.67212000 | H | -7.95637300  | 5.93757000  | -8.00614600  | H | -7.12008300  | 12.15038700 | 2.02666400  |
| <b>C<sup>-</sup>P2 in gas-phase</b> |              |             |             | O   | -10.98205500 | 2.91836300  | -11.10334600 | O | -6.80778800  | 3.82450400  | -7.66067800  | C | -3.86325300  | 10.98212300 | 2.54409900  |
| C                                   | 0.18072700   | 0.11643800  | 0.41269900  | H   | -9.35504900  | 2.86315600  | -8.12669100  | H | -7.60885100  | 6.40119800  | -6.58354500  | H | -5.78164100  | 9.94152700  | 2.55078100  |
| C                                   | 0.86367300   | 0.33611600  | 1.75286000  | C   | -8.90741800  | 3.29975700  | -6.96508400  | H | -7.61568900  | 6.66480400  | -8.75541200  | H | -5.66920500  | 11.31012000 | 3.64292900  |
| H                                   | 0.87534100   | -0.15947600 | -0.38609800 | C   | -9.77260700  | 4.41024100  | -6.37557900  | H | -9.04659600  | 5.89140200  | -8.13278600  | C | -3.22393400  | 10.31415000 | 1.31331900  |
| H                                   | -0.61081600  | -0.62936300 | 0.47159300  | O   | -7.91402600  | 2.84149100  | -6.41060600  | H | -6.23856100  | 7.08619400  | -6.41600400  | H | -3.45917000  | 10.49849300 | 3.44204300  |
| C                                   | 1.47239700   | 2.67887500  | -0.28158300 | H   | -10.75892400 | 3.95896900  | -6.20036900  | H | -7.70246400  | 5.55097400  | -5.89803600  | H | -2.14246300  | 10.50381500 | 1.33333400  |
| C                                   | 2.16257400   | 1.14851100  | 1.69312200  | H   | -8.23084800  | 6.19453700  | -5.26725100  | H | -6.21263100  | 7.56886100  | -5.43104100  | H | -3.45006000  | 8.81381100  | 1.20909100  |
| H                                   | 1.43088800   | 0.78578100  | 2.44813100  | H   | -8.85011000  | 4.27450600  | -4.43057400  | H | -6.16251500  | 7.89892600  | -7.15191800  | H | -2.96689900  | 8.39489900  | 0.32372700  |
| H                                   | 1.08366000   | -0.66356000 | 2.14816100  | H   | -10.11678000 | 5.48159600  | -4.55367900  | C | -4.85132400  | 5.12448900  | -5.48118200  | H | -4.51588600  | 8.56668000  | 1.15622100  |
| C                                   | 2.01270500   | 2.58216200  | 1.17061400  | C   | -6.82893900  | 5.80604000  | -5.77304900  | H | -4.09621800  | 6.84215100  | -6.51671500  | O | -2.87458200  | 8.19148900  | 2.39084500  |
| H                                   | 1.99515800   | 1.95489800  | -0.92249600 | H   | -8.11585700  | 6.71477700  | -4.30811000  | H | -4.93769900  | 5.68721200  | -7.51585000  | C | -2.99314000  | 6.86046000  | 2.49756700  |
| H                                   | 1.64504000   | 3.67348200  | -0.06718500 | H   | -8.65206500  | 6.93416400  | -5.96220400  | H | -3.94457000  | 4.52796800  | -5.62573700  | C | -2.34334100  | 6.36264000  | 3.77906600  |
| H                                   | 2.89292200   | 0.61380800  | 1.06641400  | C   | -6.03799600  | 4.90980500  | -4.83344200  | H | -5.70312000  | 4.44354600  | -5.47463800  | O | -3.54007500  | 10.57382000 | 1.66764400  |
| H                                   | 1.37303600   | 3.17374400  | 1.83755600  | H   | -6.25397900  | 6.72251700  | -5.95688900  | H | -4.75781400  | 5.78890800  | -4.18757300  | C | -2.27802700  | 4.92867700  | 4.18559600  |
| C                                   | 0.00272600   | 2.41888600  | -0.38151200 | H   | -6.89574000  | 5.27725800  | -6.73009800  | C | -4.76519100  | 5.00511400  | -3.10564900  | H | -1.25438000  | 6.46507500  | 3.64515900  |
| O                                   | -0.72735800  | 3.37280600  | -0.80797300 | H   | -5.04920800  | 4.67288700  | -5.23901000  | H | -4.56267500  | 5.83818600  | -1.83893100  | H | -2.61579800  | 7.06955600  | 5.45708100  |
| H                                   | -14.33206100 | 1.61520900  | -2.97351300 | H   | -5.85079800  | 5.63615000  | -3.58069800  | C | -4.97106500  | 5.11746700  | -5.40404200  | H | -1.09831100  | 10.15525500 | 1.18922400  |
| H                                   | -14.29404600 | 1.51414200  | -4.06648200 | O   | -5.21116600  | 5.00407200  | -4.25961900  | H | -3.52822600  | 6.20701100  | -1.77349700  | H | -1.86676800  | 3.76888500  | 3.64528500  |
| Zr                                  | -12.13257700 | 1.14228800  | -4.70554400 | C   | -5.07200000  | 5.89197800  | -1.36985800  | H | -5.17726000  | 6.73282000  | -1.98435800  | H | -2.67365900  | 4.87875400  | 5.28014000  |
| H                                   | -15.01358300 | 0.73584400  | -4.35059000 | O   | -4.77872700  | 3.86523800  | -2.68557500  | C | -2.31776300  | 2.93535400  | -1.34655400  | H | -2.01251600  | 3.40515300  | 2.15172800  |
| H                                   | -14.68392000 | 2.46017200  | -4.50546000 | H   | -5.13893900  | 5.15797700  | -0.01425700  | H | -3.90001700  | 4.30110700  | 0.21279200   | H | -1.22551200  | 5.23360700  | 1.25311300  |
| O                                   | -10.33248300 | 2.88858700  | -3.96487100 | H   | -4.12253400  | 6.44052300  | -1.46231800  | H | -5.83836800  | 4.47687600  | -0.74174200  | H | -1.26679400  | 3.83504000  | 1.05989300  |
| H                                   | 1.29720900   | 3.07106100  | 1.17046000  | C   | -5.85714600  | 6.65176600  | -1.42059900  | H | -5.31967600  | 5.89204400  | 0.15384600   | H | -0.80916000  | 3.96068500  | 3.87626800  |
| O                                   | -0.57006600  | 1.31073700  | -0.05348300 | H   | -2.32079000  | 3.36589200  | -1.17482300  | C | -3.49726000  | 2.93448600  | -0.38428500  | H | -2.14153600  | 2.80658000  | 4.22917300  |
| C                                   | 0.00272600   | 2.41888600  | -0.38151200 | C   | -3.84522600  | 4.54652200  | 0.56340500   | H | -2.44631200  | 3.67183000  | -2.15175800  | H | -3.04050600  | 3.58919000  | 1.82177600  |
| O                                   | -0.72735800  | 3.37280600  | -0.80797300 | H   | -5.91605200  | 4.38448700  | -0.05716400  | H | -2.12564900  | 1.96540100  | -1.76730800  | H | -1.82269900  | 3.23007000  | 2.01682800  |
| H                                   | -14.33206100 | 1.61520900  | -2.97351300 | H   | -5.48807300  | 5.89362900  | 0.70011100   | H | -4.30047300  | 4.92066000  | 0.36492100   | H | -8.31235400  | 9.37622900  | -1.06014400 |
| H                                   | -14.29404600 | 1.51414200  | -4.06648200 | C   | -3.34505400  | 3.22403200  | -0.06198000  | H | -3.00876000  | 4.11420500  | 1.21679500   | H | -8.99297800  | 9.96856900  | -1.65729800 |
| Zr                                  | -12.13257700 | 1.14228800  | -4.70554400 | H   | -2.60064400  | 4.10033200  | -1.92280400  | H | -3.38734000  | 2.50681600  | -0.93878900  | C | -9.98225800  | 10.58588600 | -1.16769200 |
| H                                   | -15.01358300 | 0.73584400  | -4.35059000 | H   | -2.00818100  | 2.41715000  | -1.65444200  | H | -4.25927400  | 2.23206200  | 0.42450000   | H | -8.97925900  | 10.06887300 | -3.07019000 |
| H                                   | -14.68392000 | 2.46017200  | -4.50546000 | H   | -4.03954400  | 4.35146900  | 1.62477000   | H | -7.63854100  | 1.55201800  | -8.17448900  | H | -10.60439400 | 11.48928500 | -0.22787600 |
| O                                   | -10.33248300 | 2.88858700  | -3.96487100 | H   | -4.18271300  | 2.67476100  | -0.50310400  | H | -9.54521000  | 1.59870600  | -9.33585800  | H | -10.21949700 | 11.00383100 | -1.25857000 |
| H                                   | 1.29720900   | 3.07106100  | 1.17046000  | C   | -2.92049400  | 2.57504300  | 0.17484900   | C | -7.71804400  | 0.45695000  | -10.11936600 | C | -9.83471000  | 10.00661000 | -3.45693200 |
| O                                   | -0.57006600  | 1.31073700  | -0.05348300 | H   | -8.91329700  | 0.25263700  | -6.61872900  | H | -9.89357200  | 1.03332500  | -10.59074600 | H | -11.40565700 | 12.21397900 | -2.23232700 |
| C                                   | 0.00272600   | 2.41888600  | -0.38151200 | C   | -9.21107900  | -0.17109900 | -7.56890200  | H | -10.18664400 | 2.21206000  | -8.71612100  | H | -10.24497400 | 11.27335500 | -4.47138500 |
| H                                   | -14.33206100 | 1.61520900  | -2.97351300 | H   | -10.51683200 | -0.16083100 | -8.12308700  | H | -6.73241700  | 0.01552400  | -10.19037600 | H | -6.73829400  | 12.15230200 | -4.36820800 |
| H                                   | -14.29404600 | 1.51414200  | -4.06648200 | H   | -8.33873800  | -0.75841000 | -8.51855300  | C | -8.76271200  | 0.33415700  | -11.08231900 | C | -7.73645800  | 13.12780200 | -4.87299000 |
| Zr                                  | -12.13257700 | 1.14228800  | -4.70554400 | H   | -10.45920400 | 0.76466500  | -9.40732100  | H | -8.74135200  | 1.12594800  | -11.08762500 | H | -5.87341300  | 12.69232400 | -3.38379800 |
| H                                   | -15.01358300 | 0.73584400  | -4.35059000 | H   | -11.40309400 | 0.24829200  | -7.65449400  | H | -10.81912000 | 0.22293700  | -12.00908700 | H | -6.63912500  | 11.18296900 | -4.83905400 |
| H                                   | -14.68392000 | 2.46017200  | -4.50546000 | C   | -7.27717000  | -0.92234400 | -7.86764500  | C | -5.83202600  | 2.25298500  | -12.18863300 | C | -7.48662200  | 14.26254600 | -3.84558900 |
| O                                   | -10.33248300 | 2.88858700  | -3.96487100 | H   | -9.11234000  | -1.12895800 | -9.65740400  | H | -6.82876000  | 2.00315500  | -13.17709400 | H | -8.52848800  | 13.03169700 | -5.38862300 |
| H                                   | 1.29720900   | 3.07106100  | 1.17046000  | H   | -11.29394800 | -0.91361100 | -10.07828200 | C | -5.79148400  | 3.65095900  | -11.95569400 | C | -6.34222200  | 15.98839700 | -3.05637000 |
| O                                   | -0.57006600  | 1.31073700  | -0.05348300 | H   | -8.74318400  | -1.62934500 | -10.54335100 | H | -5.19185300  | 1.51322600  | -11.72587900 | H | -5.02899100  | 12.18558200 | -2.83452200 |
| C                                   | 0.00272600   | 2.41888600  | -0.38151200 | C   | -6.67732800  | 1.40990700  | -10.38529500 | C | -7.40837500  | 3.24494800  | -13.53683100 | H | -8.06684700  | 15.17469700 | -3.90912000 |
| H                                   | -14.33206100 | 1.61520900  | -2.97351300 | H   | -7.46272500  | 1.07295500  | -11.52589100 | H | -7.08062600  | 1.03786800  | -13.59638300 | H | -5.91166100  | 14.64806700 | -2.30806000 |
| H                                   | -14.29404600 | 1.51414200  | -4.06648200 | C   | -6.94739300  | 2.76063900  | -10.05318100 | C | -6.71367400  | 4.26179400  | -12.77354400 | O | 2.01379100   | 11.61835300 | 0.91057000  |
| Zr                                  | -12.13257700 | 1.14228800  | -4.70554400 | H   | -5.97537900  | 0.76044400  | -8.97920700  | H | -5.15331500  | 4.15647300  | -11.24258100 | C | 2.00747000   | -2.19803500 | -0.22763300 |
| H                                   | -15.01358300 | 0.73584400  | -4.35059000 | C   | -8.21816300  | 2.21595800  | -11.88945700 | H | -8.19690700  | 3.39444100  | -14.26246400 | H | 1.04542400   | -1.91963000 | -1.03259400 |
| H                                   | -14.68392000 | 2.46017200  | -4.50546000 | H   | -7.45952000  | 1.02115100  | -12.04309500 | C | -7.00942200  | 5.31792200  | -12.80240700 | C | 3.10834400   | -3.17088400 | -0.50589400 |
| O                                   | -10.33248300 | 2.88858700  | -3.96487100 | C   | -7.90858500  | 3.25447400  | -10.97182000 | O | 1.83591500   | -1.73369900 | 1.08858000   | C | 0.93100400   | -2.50543800 | -2.39771200 |
| H                                   | 1.29720900   | 3.07106100  | 1.17046000  | H   | -6.53166000  | 3.29814800  | -9.21070700  | C | 1.82877600   | -2.73812800 | 0.36033500   | C | 2.60113200   | -4.62044900 | -1.72954800 |
| O                                   | -0.57006600  | 1.31073700  | -0.05348300 | H   | -8.91154900  | 2.28408400  | -12.71612500 | O | 0.99055200   | -2.75736000 | -0.66124400  | C | 6.65391300   | -1.62045000 | -1.39569000 |
| C                                   | 0.00272600   | 2.41888600  | -0.38151200 | H   | -8.34312600  | 4.24614400  | -10.96595400 | C | 2.73762400   | -3.90231400 | 0.66679500   | C | 3.79407500   | -3.12350700 | 0.34237400  |
| H                                   | -14.33206100 | 1.61520900  | -2.97351300 | C   | 3.51369600   | -0.27726900 | 4.07452200   | C | 0.90325400   | -3.88267800 | -1.59627400  | C | 0.69829400   | -4.00775800 | -2.37475300 |
| H                                   | -14.29404600 | 1.51414200  | -4.06648200 | C   | 3.50188100   | -1.48527900 | 0.25964300   | C | 1.97408500   | -5.19280200 | 1.05577800   | H | 1.83064700   | -2.21467600 | -2.94794300 |
| Zr                                  | -12.13257700 | 1.14228800  | -4.70554400 | C   | 2.29487100   | -0.09802200 | 0.21804100   | H | 3.37922400   | -4.09642700 | -0.20352000  | H | 0.07628200   | -1.96709900 | -2.79651100 |
| H                                   | -15.01358300 | 0.73584400  | -4.35059000 | C</ |              |             |              |   |              |             |              |   |              |             |             |

|   |              |             |              |                                |              |             |              |            |              |             |             |    |             |              |             |
|---|--------------|-------------|--------------|--------------------------------|--------------|-------------|--------------|------------|--------------|-------------|-------------|----|-------------|--------------|-------------|
| C | -8.19379800  | 6.20350400  | -5.29523800  | H                              | -3.57187200  | 6.21496900  | -1.80292600  | C          | -9.14253900  | 9.77899500  | -2.65646700 | F  | 3.24089200  | 0.28393900   | -4.26912000 |
| H | -8.82599400  | 4.29515500  | -4.44157900  | H                              | -5.22792200  | 6.73155900  | -1.98356300  | C          | -10.53501200 | 11.56192700 | -2.24616600 | F  | 4.12295600  | 1.28516500   | -1.88513300 |
| H | -10.08567700 | 5.50788100  | -4.58038600  | C                              | -2.31512100  | 2.99026300  | -1.41330200  | H          | -10.13971100 | 11.60949900 | -0.04838700 | F  | 6.47714400  | 0.37820400   | -0.83373900 |
| C | -6.79301600  | 5.80221600  | -5.79166800  | C                              | -3.89894900  | 4.29645600  | -1.77791600  | H          | -8.60866100  | 8.98447500  | -3.16127300 | F  | 7.96681700  | -1.37568800  | -2.14689200 |
| H | -8.07961700  | 6.73361800  | -4.34139500  | H                              | -5.85143800  | 4.45853700  | -0.74875100  | C          | -10.02428200 | 10.71982500 | -3.26538400 |    |             |              |             |
| H | -8.60837500  | 6.93784600  | -5.99969700  | H                              | -5.33490400  | 5.87288200  | -1.48806000  | C          | -11.23099900 | 12.37808700 | -2.38323800 |    |             |              |             |
| C | -6.01008900  | 4.91133200  | -4.83963000  | C                              | -3.48381500  | 2.94256900  | -0.43944400  | H          | -10.28438800 | 10.76250400 | -4.31514400 |    |             |              |             |
| H | -6.21121700  | 6.71349000  | -5.88270900  | H                              | -2.45791400  | 3.72141200  | -2.20429700  | C          | -6.69045000  | 11.13894400 | -4.43378500 |    |             |              |             |
| H | -6.85793500  | 5.26363900  | -6.74324200  | H                              | -2.11526800  | 2.01202300  | -1.85284500  | C          | -7.55219200  | 12.14416800 | -4.96156300 |    |             |              |             |
| H | -5.02073800  | 4.66485300  | -5.23798300  | H                              | -3.01060100  | 4.92640800  | -0.32831200  | C          | -5.72705600  | 11.77743900 | -3.61356800 |    |             |              |             |
| H | -6.53251300  | 3.97809800  | -4.62711700  | H                              | -4.28748500  | 4.09265200  | -1.18347200  | C          | -6.74430700  | 10.07872200 | -4.64362800 |    |             |              |             |
| O | -5.82407100  | 5.65045600  | -3.59358000  | H                              | -4.32467100  | 2.50989600  | -0.99082400  | C          | -7.11913900  | 13.39773200 | -4.46128500 |    |             |              |             |
| C | -5.19590100  | 5.02635500  | -2.59768600  | H                              | -3.22791700  | 2.23231200  | -0.35805000  | H          | -8.37437000  | 11.98328600 | -5.64684600 |    |             |              |             |
| C | -5.05824100  | 5.92786400  | -1.38122800  | H                              | -8.97414700  | 1.91511500  | -7.96528700  | C          | -5.99926600  | 13.16930800 | -3.61873200 |    |             |              |             |
| O | -4.77068900  | 3.88320500  | -2.66921500  | C                              | -9.22019200  | 1.54081900  | -8.95032600  | H          | -4.95071400  | 11.28170900 | -3.04505200 |    |             |              |             |
| C | -5.15307300  | 5.21174400  | -0.01780500  | C                              | -10.27125600 | 1.99656500  | -9.78669000  | H          | -7.56647200  | 14.35788000 | -4.67809800 |    |             |              |             |
| H | -4.09201000  | 4.64036300  | -1.46835200  | C                              | -8.48582200  | 0.56317800  | -9.66605800  | H          | -5.45706900  | 13.92463700 | -3.06407700 |    |             |              |             |
| H | -5.83091200  | 6.69875300  | -1.45096200  | C                              | -10.20510900 | 1.28234300  | -11.01256900 | O          | 1.93673800   | -1.16085900 | -0.51328300 |    |             |              |             |
| C | -2.35133300  | 3.35510100  | -1.11752500  | H                              | -10.99293800 | 2.76505700  | -9.53958100  | C          | 1.59557200   | -1.18517300 | -1.95475000 | Zr | 1.29691100  | -2.25398400  | 0.35030100  |
| C | -3.87507900  | 4.59128300  | -0.58426000  | H                              | -7.62985100  | 0.01625400  | -9.29322300  | C          | 2.45868000   | -1.60583900 | -2.46568000 | C  | -0.47514500 | -3.00421400  | 1.57474200  |
| H | -5.93966300  | 4.44797000  | -0.06109200  | C                              | -9.09835800  | 0.39949800  | -10.94309900 | H          | 0.73248500   | -1.84545600 | -2.03847000 | H  | -0.55671300 | -2.59108000  | 2.58804200  |
| H | -5.50183100  | 5.96087600  | -0.70280500  | H                              | -10.87634000 | 1.39723800  | -11.85247300 | H          | 1.36282300   | -0.17233300 | -2.28905100 | H  | -1.40820400 | -2.76771500  | 1.04622200  |
| C | -3.86030000  | 3.25082200  | -0.01087200  | H                              | -8.79356600  | -0.29949100 | -11.71134600 | H          | -10.40386600 | -0.66779100 | -0.35644200 | H  | -0.40386600 | -0.49630900  | 1.66892800  |
| H | -2.62037900  | 4.06725000  | -1.89031900  | C                              | -5.75643800  | 1.69499900  | -11.15029300 |            |              |             |             | H  | 1.21923300  | -5.38625200  | -2.36717300 |
| H | -2.10890100  | 2.39131100  | -1.56435600  | C                              | -6.36828300  | 1.57182400  | -12.43188100 |            |              |             |             | H  | 0.02352500  | -0.50097500  | -2.98398900 |
| H | -3.06291500  | 5.33216800  | -0.56554200  | C                              | -5.51779500  | 3.07094900  | -10.91090100 |            |              |             |             | H  | -0.34975600 | -5.06175800  | -4.47320500 |
| H | -4.08484000  | 4.41617500  | -1.64677300  | H                              | -5.49476100  | 0.88079700  | -10.48744700 |            |              |             |             | H  | 0.50066900  | -5.95192100  | -2.67451900 |
| H | -4.22651800  | 2.70366100  | -0.44975900  | C                              | -6.50699200  | 2.87316900  | -12.97645500 |            |              |             |             | H  | -0.86195900 | -4.90377200  | -2.34996600 |
| H | -2.97768000  | 2.61119500  | -0.78237300  | H                              | -6.64923600  | 0.64630300  | -12.91754900 |            |              |             |             | C  | 2.18874000  | -3.67452000  | -4.71099300 |
| H | -8.87678900  | 0.25158800  | -6.59626000  | C                              | -5.99366200  | 3.79995200  | -12.03084000 |            |              |             |             | H  | 0.75125100  | -5.65935500  | -5.39667600 |
| C | -9.19033500  | -0.17825100 | -7.53898400  | H                              | -5.09770300  | 3.48965200  | -10.00560700 |            |              |             |             | H  | -0.61319400 | -4.05733000  | -4.87122500 |
| C | -10.50216200 | -0.15696000 | -8.07870300  | C                              | -6.93533100  | 3.11796800  | -13.93856900 |            |              |             |             | H  | -1.26567300 | -5.65493500  | -4.56699300 |
| C | -8.33629200  | -0.78576900 | -8.48249400  | H                              | -5.98226500  | 4.87712900  | -12.13971900 |            |              |             |             | C  | 2.15499600  | -5.12078400  | -5.03397700 |
| C | -10.46685800 | -0.77367000 | -9.35746100  | O                              | 1.79751900   | -1.76393000 | 0.84918500   |            |              |             |             | C  | 3.18846000  | -3.21086400  | -4.78257100 |
| H | -11.37795200 | 0.26765100  | -7.60414700  | C                              | -3.20414800  | -2.54720300 | -0.35221100  |            |              |             |             | H  | 1.51635700  | -3.04906600  | -3.53534300 |
| H | -7.27548300  | -0.96208000 | -8.37199600  | H                              | 2.54718900   | -1.95427200 | -1.11551600  |            |              |             |             | H  | 0.52430100  | -5.43468400  | -6.40531100 |
| C | -9.12708100  | -1.15683600 | -9.61923800  | H                              | 2.62533800   | -3.42515800 | -0.08358600  |            |              |             |             | H  | 0.75797400  | -6.75143900  | -5.25449100 |
| H | -11.31058000 | -0.91886000 | -10.01755500 | H                              | 1.05393600   | -2.86140800 | -0.71023300  | Zr         | 2.17966700   | -2.44017300 | 0.29723100  | H  | 2.80159800  | -5.27447000  | -5.91062100 |
| H | -8.77447200  | -1.67049800 | -10.50431400 | H                              | 2.65226800   | -1.51445200 | 1.24543100   |            |              |             |             | H  | 6.24273600  | -6.67619800  | -4.21189200 |
| C | -6.65980900  | 1.36300300  | -10.36847000 |                                |              |             |              |            |              |             |             | O  | 1.84933500  | -3.32424900  | -3.29805800 |
| C | -7.44560000  | 1.01096800  | -11.50427500 |                                |              |             |              |            |              |             |             | C  | 0.95459300  | -3.89461100  | -2.54866500 |
| C | -6.92588500  | 2.71954100  | -10.05742100 |                                |              |             |              |            |              |             |             | O  | 0.86645300  | -3.50145200  | -1.35959800 |
| H | -5.95973700  | 0.71945700  | -9.85241500  | C <sup>+</sup> -P3 termination | C            | 0.86891500  | -0.59945100  | 0.44440700 |              |             |             | H  | 1.00472000  | -4.80802500  | 1.32625300  |
| H | -8.19757900  | 2.15046400  | -11.88557100 | C                              | 1.48697400   | -0.46545300 | 1.81296500   |            |              |             |             | H  | 1.88505400  | -10.52376000 | -1.97027000 |
| H | -4.44745500  | 0.05239800  | -10.00695400 | H                              | 0.57218100   | 0.36756200  | 0.03668500   |            |              |             |             | H  | 1.32833400  | -5.01156400  | -3.28972600 |
| H | -7.88517800  | 3.20212000  | -10.98388800 | H                              | 0.07632300   | -1.34433000 | 0.37395600   |            |              |             |             | C  | 0.57131900  | -5.13146600  | -4.61886200 |
| H | -6.50858000  | 3.26873600  | -9.22330000  | C                              | 2.28766100   | 2.87534200  | 2.72387800   |            |              |             |             | H  | 2.24916300  | -5.60955700  | -3.30603500 |
| H | -8.89037700  | 2.20808100  | -11.87367200 | C                              | 2.74176100   | 0.44771600  | 1.85320200   |            |              |             |             | H  | 1.76321100  | -5.42889400  | -2.46759300 |
| H | -8.31675600  | 4.19530500  | -10.99353900 | H                              | 0.68344800   | -0.03018200 | 2.14605800   |            |              |             |             | C  | 1.64591800  | -2.45782600  | -5.01470300 |
| O | 3.37616500   | -0.44977300 | 0.44259600   | H                              | 1.70317700   | -1.45393200 | 2.23320600   |            |              |             |             | C  | 1.42611400  | -4.87677400  | -5.86494500 |
| C | 3.54830000   | -1.62484900 | -0.35468900  | C                              | 2.77143600   | 1.44666500  | 3.03865700   |            |              |             |             | C  | 1.29617200  | -4.45953300  | -4.60287500 |
| H | 2.62736000   | -1.75447000 | -0.92846600  | H                              | 2.95674800   | 3.32622900  | 1.97649100   |            |              |             |             | C  | 0.15723900  | -6.14453600  | -4.66611400 |
| H | 4.38465900   | -1.52536200 | -1.05881600  | H                              | 2.36279300   | 3.49791000  | 3.61918000   |            |              |             |             | C  | 2.28291300  | -3.59891900  | -5.78388100 |
| H | 3.70722500   | -2.51999500 | 0.26165800   | H                              | 2.82094400   | 1.03347400  | 0.92370600   |            |              |             |             | C  | 2.14500800  | -1.51380600  | -5.21530700 |
| H | 4.19231400   | -0.32447800 | 0.95345900   | H                              | 3.63451800   | -0.18777600 | 1.99094600   |            |              |             |             | H  | 0.75463800  | -4.81587200  | -6.73443600 |
|   |              |             |              | H                              | 2.19479700   | 1.03181700  | 3.87471300   |            |              |             |             | H  | 2.08627600  | -5.73166700  | -6.05060300 |
|   |              |             |              | H                              | 3.80086300   | 1.53527700  | 3.40077100   |            |              |             |             | C  | 2.50263200  | -3.22633000  | -6.79101200 |
|   |              |             |              | O                              | 0.41411200   | 2.22667500  | 1.32265000   |            |              |             |             | H  | 4.40174300  | -6.60491000  | -9.00942800 |
|   |              |             |              | C                              | 0.87975000   | 2.98888500  | 2.16119600   |            |              |             |             | C  | 3.32628300  | -3.79652100  | -5.33869700 |
|   |              |             |              | C                              | 0.23834700   | 4.04242900  | 2.65493500   |            |              |             |             | O  | 1.81328100  | -2.56180300  | -3.54497600 |
|   |              |             |              | H                              | -9.47862500  | 14.14493300 | -1.21115700  |            |              |             |             | H  | 1.72386300  | -3.63301600  | -2.81038300 |
|   |              |             |              | H                              | -8.93340200  | 14.12166600 | -2.16433200  |            |              |             |             | O  | 1.99151600  | -3.49858400  | -1.59278500 |
|   |              |             |              | Zr                             | -8.00653000  | 12.05242200 | -2.43593800  |            |              |             |             | H  | -0.43659200 | -1.33434800  | -1.24901700 |
|   |              |             |              | H                              | -9.62980900  | 14.43934600 | -2.95083700  |            |              |             |             | H  | -0.06275000 | -1.26585300  | 1.43469000  |
|   |              |             |              | H                              | -8.12937100  | 14.86814400 | -2.11115400  |            |              |             |             | C  | 2.98238000  | -3.95023600  | 3.01977900  |
|   |              |             |              | O                              | -6.83261200  | 12.05203900 | -0.74201500  |            |              |             |             | H  | 3.67324300  | -5.26297900  | 0.76832400  |
|   |              |             |              | C                              | -6.28902500  | 11.31444400 | -2.01100900  |            |              |             |             | C  | 5.02354300  | -3.56340300  | -0.80827300 |
|   |              |             |              | C                              | -5.93989600  | 12.12068800 | 1.45866400   |            |              |             |             | H  | 5.14528900  | -1.18216200  | 0.43074600  |
|   |              |             |              | H                              | -6.10385500  | 10.10825700 | 0.10386800   |            |              |             |             | C  | 3.88093500  | -1.41957800  | 2.80663300  |
|   |              |             |              | H                              | -5.30408500  | 11.33219400 | 0.61443700   |            |              |             |             | H  | 1.61673900  | -0.07317500  | 2.37486000  |
|   |              |             |              | H                              | -5.30303200  | 12.96093600 | 1.14997300   |            |              |             |             | H  | 7.35688800  | -2.58169800  | -4.94844400 |
|   |              |             |              | H                              | -6.87844800  | 12.58580200 | 1.78862700   |            |              |             |             | C  | 5.71919800  | -1.99815600  | -6.47563300 |
|   |              |             |              | C                              | -3.77009900  | 11.19858900 | 2.57265400   |            |              |             |             | H  | 8.02045800  | -1.02318400  | -6.44794600 |
|   |              |             |              | H                              | -5.77533200  | 10.34436600 | 0.67310700   |            |              |             |             | H  | 8.14129100  | -2.65850400  | -7.09124200 |
|   |              |             |              |                                |              |             |              |            |              |             |             |    |             |              |             |



|    |             |             |             |   |             |             |              |   |             |             |              |   |             |             |             |
|----|-------------|-------------|-------------|---|-------------|-------------|--------------|---|-------------|-------------|--------------|---|-------------|-------------|-------------|
| F  | 7.86157100  | -4.58689900 | -7.27209200 | C | 12.40647200 | 0.55421000  | -2.91039800  | H | 6.78845100  | 0.57076400  | -9.30715300  | C | 3.98923300  | -2.38741500 | -4.32309600 |
| F  | 7.69164900  | -5.59939600 | -4.72226600 | C | 8.11423000  | -2.04231100 | -3.90090100  | H | 4.01140700  | -0.20120800 | -9.17157200  | C | 3.07500400  | -4.79841800 | -4.35242000 |
| F  | 8.01555000  | -4.03498200 | -2.61804900 | C | 8.23189100  | -3.41347400 | -3.63766200  | H | 5.28424300  | -0.99539900 | -10.08049300 | H | 1.28587000  | -3.58372000 | -0.40580300 |
| F  | 5.86160900  | -2.43890400 | -2.16353800 | C | 8.10149000  | -1.74285300 | -5.26672000  | O | 4.04959300  | -0.52059100 | -6.37665500  | H | 0.98732700  | -5.28750300 | -4.35804700 |
| F  | 4.91929500  | -3.27519200 | 0.17182300  | C | 8.27303600  | -4.40153600 | -4.62250500  | C | 4.41019500  | -1.61380400 | -6.77612300  | C | 4.15137900  | -3.82302800 | -3.84598700 |
| F  | 6.25658200  | -2.72352800 | 2.50195700  | C | 8.13956600  | -2.69269900 | -6.28367800  | O | 4.44933600  | -2.71340700 | -6.01262200  | H | 4.15824000  | -1.73287100 | -3.83615700 |
| F  | 8.67538500  | -1.42507400 | 2.38045800  | C | 8.21739400  | -4.04148100 | -5.96347500  | C | 8.45184400  | -0.50291700 | -3.14766100  | H | 2.99182300  | -1.99705700 | -4.12786000 |
| F  | 7.62348600  | -0.64329800 | 0.05850700  | C | 7.62305900  | -1.35865200 | -1.24365900  | C | 7.26758700  | 0.53961800  | -3.62862500  | H | 3.04887500  | -4.74508400 | -5.44858700 |
| F  | 7.38757900  | 3.87241200  | -4.46105100 | C | 6.49014400  | -2.16301000 | -1.08638600  | H | 7.32979000  | 1.48997600  | -3.07837000  | H | 3.39159300  | -5.82238000 | -4.10643100 |
| C  | 7.68487700  | 5.32430200  | -4.81603800 | C | 8.14151200  | -0.88271300 | -0.03751500  | H | 7.28740000  | 0.77795100  | -4.69284600  | H | 5.13828100  | -4.17979700 | -4.16644000 |
| H  | 8.18755600  | 3.40402000  | -3.88596800 | C | 5.93334000  | -2.50317000 | 0.14032000   | H | 6.27720000  | 0.11920400  | -3.41228900  | O | 4.17788100  | -3.79957700 | -2.87139000 |
| H  | 6.46077300  | 3.78632100  | -3.89299200 | C | 7.61453400  | -1.18711900 | 1.01938600   | C | 9.99584200  | 0.09675800  | -3.33060000  | O | 1.95385300  | -2.51588200 | -1.85303000 |
| C  | 4.92226600  | 3.28960600  | -6.48530500 | C | 6.49705100  | -2.00562700 | 1.30865700   | C | 11.09253200 | -0.50136400 | -2.69761000  | C | 1.77764700  | -3.64810200 | -1.41101600 |
| C  | 9.11317600  | 5.58013800  | -5.31639200 | F | 13.68756500 | 0.94273000  | -2.97764900  | C | 10.35847000 | 1.13149400  | -4.19073400  | O | 1.81735300  | -3.97316600 | -0.12279200 |
| H  | 6.94394800  | 5.66894600  | -5.55014200 | F | 11.69383600 | 2.53290000  | -4.02931800  | C | 12.41555500 | -0.09604200 | -2.85620100  | H | 0.55182300  | -1.63229600 | 0.38803000  |
| H  | 7.51487200  | 5.91349900  | -3.90554900 | F | 9.17518800  | 1.78819500  | -3.92376500  | C | 11.66432300 | 1.57880200  | -4.38169100  | H | 0.85586600  | -1.84468600 | 3.05865100  |
| C  | 9.48549900  | 4.82931200  | -6.60063900 | F | 10.45981900 | -2.22660200 | -1.69788700  | C | 12.71118000 | 0.96288500  | -3.71170700  | H | 1.78058700  | -5.47256200 | 4.32475200  |
| H  | 9.89956700  | 2.95412900  | -5.55540800 | F | 13.01211500 | -1.44694100 | -1.81189600  | C | 8.47711800  | -1.89790900 | -4.06143500  | H | 2.69043300  | -6.46442500 | 1.99391200  |
| H  | 9.95910800  | 2.82335000  | -7.31401300 | F | 8.07188700  | -0.44756000 | -5.70020400  | C | 8.66818100  | -3.19288200 | -3.56360600  | H | 4.51593700  | -4.76434900 | 1.01508800  |
| H  | 9.82227700  | 5.30164100  | -4.52451100 | F | 8.08916900  | -2.31633200 | -7.58236500  | C | 8.37729000  | -1.85337800 | -5.45554900  | H | 4.72606200  | -2.68931200 | 2.71562100  |
| H  | 9.24292600  | 6.65610100  | -5.48428100 | F | 8.24888500  | -4.97105800 | -6.92878100  | C | 6.88863900  | -4.34221400 | -4.35412500  | H | 3.03993500  | -3.18995000 | 4.78176100  |
| H  | 8.85221000  | 5.16178100  | -7.43445700 | F | 8.36910100  | -5.69746300 | -4.28768400  | C | 8.38133700  | -2.97113900 | -6.28535400  | H | 1.48636400  | -1.20008600 | 4.21095800  |
| H  | 10.11400600 | 5.08914200  | -6.87514300 | F | 8.51289500  | -3.87182000 | -2.37406500  | C | 8.53327900  | -4.23558200 | -5.73157400  | H | 5.18240000  | -3.08292800 | -8.16667500 |
| O  | 7.10984600  | 3.03947400  | -5.63255300 | F | 5.84810600  | -2.65605500 | -2.17302600  | C | 8.05099800  | -0.76720400 | -1.55544900  | C | 5.38503300  | -2.41983500 | -8.78610600 |
| C  | 8.02644600  | 2.71816500  | -6.53050400 | F | 4.83715000  | -3.28961300 | 0.20530700   | C | 6.96908300  | -1.58696500 | -1.21427000  | H | 6.13926200  | 3.54930200  | -7.08590600 |
| O  | 7.69807900  | 1.94254800  | -7.44057100 | F | 5.94862300  | -2.29221600 | 2.50898100   | H | 8.56693900  | -0.06276100 | -0.46869900  | H | 6.11444000  | -4.47130600 | -6.80961600 |
| C  | 7.26134500  | 0.29827200  | -2.92351500 | F | 8.16623000  | -0.68334300 | 2.53566000   | C | 6.46678300  | -1.73020000 | 0.07400500   | C | 4.05834500  | -1.28105200 | -7.84166400 |
| H  | 6.23475700  | -0.07730300 | -2.85751900 | F | 9.20514300  | -0.04521200 | -0.02237400  | C | 8.09406300  | -0.15788500 | 0.84006700   | C | 5.95549000  | 1.05257600  | -8.09924800 |
| H  | 7.36930200  | 1.07016500  | -2.15356500 | C | 8.67852900  | 4.61708400  | -4.70267100  | H | 7.03200300  | -1.00711200 | 1.11755200   | H | 4.35494200  | 2.79348300  | -8.69746900 |
| H  | 7.35860500  | 0.79480200  | -3.89644700 | C | 9.31892600  | 5.75761600  | -5.47813000  | F | 13.97403400 | 1.37560500  | -3.88409700  | H | 5.96748000  | 2.34245000  | -9.86101900 |
|    |             |             |             | C | 9.39765900  | 3.99045900  | -4.17543300  | F | 11.91525100 | 2.61260300  | -4.522542300 | H | 4.16727000  | 0.06678400  | -8.56949100 |
|    |             |             |             | H | 7.92446400  | 4.97101200  | -4.00061800  | F | 9.42213100  | 1.81187100  | -4.91951400  | H | 5.44703000  | -1.74641600 | -7.90933800 |
|    |             |             |             | C | 8.95471100  | 2.95076600  | -6.83291500  | F | 10.89186900 | -1.53623700 | -1.85917300  | H | 3.75887800  | -1.98999800 | -8.30456100 |
|    |             |             |             | C | 10.58014000 | 5.36837100  | -6.26280100  | H | 13.40897400 | -0.71144900 | -2.19807300  | H | 5.39438300  | 1.18587700  | -7.02790200 |
|    |             |             |             | H | 8.56681000  | 6.21480400  | -6.13483300  | F | 8.28609900  | -0.66145600 | -6.10886000  | H | 6.49134100  | 1.06263100  | -8.27299400 |
|    |             |             |             | H | 9.58185900  | 6.52096800  | -4.73465300  | H | 8.25549300  | -2.83356400 | -7.62027500  | H | 3.42864900  | 0.52010900  | -8.41847400 |
|    |             |             |             | C | 10.35446600 | 4.31950200  | -7.35961200  | F | 8.34417200  | -5.32660300 | -6.50999500  | H | 4.52302700  | -0.11316900 | -9.64817500 |
|    |             |             |             | H | 10.43022200 | 2.66032000  | -9.94651100  | H | 8.85980600  | -5.55143200 | -3.79696400  | C | 3.70639100  | -1.07008400 | -5.81021200 |
|    |             |             |             | H | 9.98019600  | 2.17014700  | -7.58566800  | F | 8.84181100  | -3.40840500 | -2.24368200  | C | 4.09472800  | -1.17827100 | -6.38636900 |
|    |             |             |             | H | 11.33359000 | 4.98931000  | -5.55950500  | C | 6.32343400  | -2.29519000 | -2.16816200  | C | 4.24983900  | -2.36305800 | -5.57365000 |
|    |             |             |             | H | 11.00407800 | 6.26995500  | -6.71968000  | F | 5.41985500  | -2.54549600 | 0.31610400   | H | 8.42116500  | -2.96297600 | -3.30719000 |
|    |             |             |             | H | 9.66331800  | 4.69953100  | -8.12335900  | C | 6.53734500  | -1.07747000 | 2.36860800   | C | 7.53716300  | 0.96898900  | -3.94597300 |
|    |             |             |             | H | 11.30380200 | 4.12894200  | -7.87098900  | F | 8.64308100  | 0.57865500  | 1.82556800   | H | 7.61136000  | 1.86280800  | -3.31134400 |
|    |             |             |             | O | 7.87793200  | 3.71624000  | -5.56679000  | C | 9.57938300  | 0.83547200  | -0.63927300  | H | 7.82884300  | 1.25779000  | -4.95761000 |
| Zr | 11.99937000 | -3.32038000 | 1.32421100  | C | 8.40814000  | 2.95075700  | -6.453736900 | C | 8.94023000  | 4.81848200  | -5.11908500  | H | 6.47118000  | 0.71057600  | -3.99168800 |
| H  | -1.06254000 | -3.60119800 | 1.57547400  | O | 7.64494200  | 2.16958600  | -7.11491900  | C | 9.49110500  | 6.07427200  | -5.76658600  | C | 10.04980100 | 0.12216300  | -3.20447300 |
| H  | -1.45765800 | -3.36241600 | 2.57177000  |   |             |             |              | H | 9.71591000  | 4.11274700  | -4.82912300  | C | 10.89583400 | -0.11615000 | -2.11341700 |
| H  | -1.58838300 | -2.96529600 | 0.84987000  |   |             |             |              | H | 8.31135600  | 5.02686400  | -4.25912800  | C | 10.72427600 | 0.65771900  | -4.30355000 |
| H  | -1.31943100 | -4.64639400 | 1.35686800  |   |             |             |              | C | 9.76349500  | 3.54125700  | -7.65981100  | C | 12.26014900 | 0.18084100  | -2.09632000 |
| H  | 2.88925400  | -1.17514700 | -0.23682000 |   |             |             |              | C | 10.61950700 | 5.82424500  | -6.77643900  | C | 12.07969100 | 0.96809100  | -4.34075600 |
| C  | 0.82079900  | -0.92813700 | 0.48003600  |   |             |             |              | H | 8.66991800  | 6.64856100  | -6.21645100  | C | 12.86495800 | 0.73150700  | -3.22046800 |
| C  | 3.02111700  | -0.94947300 | 1.80088400  |   |             |             |              | H | 9.88319400  | 6.66684600  | -4.93307300  | C | 14.91968600 | -1.65495900 | -4.21898200 |
| C  | 2.22745500  | -1.10471500 | 0.55499900  |   |             |             |              | H | 10.22123800 | 4.98257600  | -7.99647100  | C | 9.06186000  | -2.80631200 | -3.74773300 |
| C  | 2.57956800  | -1.25359600 | 1.91932900  |   |             |             |              | H | 10.45030800 | 3.08622000  | -6.93486800  | C | 7.90053700  | 1.08776100  | -5.50727900 |
| H  | 3.57854700  | -1.40759400 | 2.30464900  |   |             |             |              | H | 9.75862900  | 2.91282200  | -8.55298400  | C | 9.18881500  | -3.99506600 | -4.46658900 |
| C  | 1.38546300  | -1.16362600 | 2.06186000  |   |             |             |              | H | 11.45033100 | 5.32974200  | -6.25628400  | C | 8.09008000  | -2.92626000 | -6.27183600 |
| C  | 1.00056300  | -5.21005600 | 3.09113800  |   |             |             |              | C | 8.65955800  | -4.06473100 | -5.75060600  | C | 8.63597500  | -1.49207800 | -1.44923800 |
| C  | 2.02331500  | -4.33903000 | 3.54288900  |   |             |             |              | H | 7.86262000  | 0.50061900  | -0.82795200  | C | 7.86262000  | 0.50061900  | -0.82795200 |
| C  | 1.45371300  | -5.83406500 | 1.89727200  |   |             |             |              | H | 6.14551600  | -1.53031600 | -0.23617200  | C | 7.20684500  | 0.51431200  | 0.39513800  |
| C  | 3.11045200  | -4.42240300 | 2.62639700  |   |             |             |              | H | 6.33237700  | -0.52240500 | 0.69987000   | C | 6.33237700  | -0.52240500 | 0.69987000  |
| C  | 2.75779300  | -5.35665600 | 1.61919900  |   |             |             |              | H | 14.17278100 | 1.02814300  | -3.32635500  | H | 14.17278100 | 1.02814300  | -3.32635500 |
| Zr | 11.99937000 | -3.32038000 | 1.32421100  |   |             |             |              | H | 12.63070600 | 1.50893000  | -5.54044000  | H | 12.63070600 | 1.50893000  | -5.54044000 |
| H  | -1.06254000 | -3.60119800 | 1.57547400  |   |             |             |              | H | 10.04882800 | 0.93249000  | -5.46809000  | H | 10.04882800 | 0.93249000  | -5.46809000 |
| H  | -1.45765800 | -3.36241600 | 2.57177000  |   |             |             |              | H | 10.42480800 | -0.65287600 | -0.97077100  | H | 10.42480800 | -0.65287600 | -0.97077100 |
| H  | -1.58838300 | -2.96529600 | 0.84987000  |   |             |             |              | H | 12.99787100 | -0.06106700 | -0.99845700  | H | 12.99787100 | -0.06106700 | -0.99845700 |
| H  | -1.31943100 | -4.64639400 | 1.35686800  |   |             |             |              | F | 7.23595300  | -0.7        |              |   |             |             |             |

|    |             |             |             |    |             |             |             |   |             |             |             |   |             |             |             |
|----|-------------|-------------|-------------|----|-------------|-------------|-------------|---|-------------|-------------|-------------|---|-------------|-------------|-------------|
| C  | 10.97811800 | 5.02921600  | 0.14945400  | F  | 7.62936600  | -4.38670600 | -6.88352600 | O | 4.01889000  | -0.52747700 | -6.33498600 | H | -1.02566800 | -2.92112100 | 3.02007800  |
| H  | 10.30256000 | 2.99257900  | -0.26514000 | F  | 7.50231800  | -4.83620100 | -4.17960600 | O | 4.37609000  | -1.62384000 | -6.73059300 | H | 2.27549600  | -6.26589600 | 3.88397500  |
| H  | 11.77544700 | 3.44330700  | -1.12245100 | F  | 8.00362300  | -2.88940100 | -2.45737800 | O | 4.37007400  | -2.72789100 | -5.97473900 | H | 3.28629200  | -6.07690280 | 1.44083900  |
| H  | 9.49745600  | 4.50986000  | 1.62862600  | F  | 5.98613100  | -1.16016400 | -2.49814500 | B | 8.54252900  | -0.45089400 | -3.32278100 | H | 4.70756700  | -4.61654400 | 0.66933000  |
| H  | 9.97413200  | 6.20166200  | 1.65407800  | F  | 4.82192200  | -1.31229000 | -0.11130300 | H | 7.44299100  | 0.62478400  | -3.91780300 | H | 4.57279900  | -2.78449400 | 2.61936500  |
| H  | 1.28984700  | 5.90368900  | -0.43399200 | F  | 6.06681000  | -0.22324200 | 2.09674900  | H | 4.74807200  | 1.57137200  | -3.35898000 | H | 3.06323300  | -3.79926200 | 4.61711900  |
| H  | 11.80637100 | 4.79597800  | -0.82774100 | F  | 8.46356600  | 1.01804400  | 1.82168800  | H | 7.56803300  | 0.85880800  | -4.97616100 | H | 1.21183700  | -1.98909100 | 4.18598100  |
| O  | 8.77342800  | 4.53850100  | -2.00958900 | F  | 9.68356700  | 1.10444700  | -0.51294300 | C | 6.42772700  | 0.22611400  | -3.79236600 | C | 6.43113800  | 3.67600600  | -8.12689300 |
| O  | 10.02818700 | 4.11953700  | -2.04851600 | C  | 9.87067900  | 5.66153100  | -4.54197000 | C | 10.12494400 | 0.07568700  | -3.42175800 | C | 5.20676200  | 2.61415400  | -8.60687300 |
| C  | 10.57658800 | 4.02201200  | -3.15538200 | C  | 10.81403800 | 6.07855400  | -5.65125100 | C | 11.15410300 | -0.54639400 | -2.70106600 | H | 6.36488400  | 3.64149500  | -7.06823900 |
|    |             |             |             | C  | 10.07043300 | 3.15015400  | -7.32386900 | C | 10.57563800 | 1.12372500  | -4.21453900 | H | 6.62079300  | 4.28400100  | -8.70730600 |
|    |             |             |             | C  | 11.69295200 | 4.95714900  | -6.25244000 | C | 12.48785600 | -0.14381200 | -2.71884200 | C | 3.58271000  | -0.82874000 | -7.67535100 |
|    |             |             |             | H  | 10.18157500 | 6.52210700  | -6.42740300 | C | 11.88807000 | 1.58789400  | -4.24416600 | C | 4.95521100  | 1.31787400  | -7.82595800 |
|    |             |             |             | H  | 11.45329800 | 6.88175500  | -5.26321000 | C | 12.86437200 | 0.95116100  | -3.49321800 | H | 4.34772500  | 3.29268500  | -8.51072400 |
|    |             |             |             | H  | 11.16273900 | 4.22544700  | -7.50438700 | C | 8.53863800  | -1.88590600 | -4.17122000 | H | 5.31606500  | 2.39814200  | -9.67829900 |
|    |             |             |             | H  | 10.20305100 | 2.61728000  | -6.37349300 | C | 8.65920200  | -3.16192400 | -3.60561500 | C | 3.70591400  | 0.56439100  | -8.30120400 |
|    |             |             |             | H  | 10.15507900 | 2.38736600  | -8.10342200 | C | 8.64219800  | -1.90792700 | -5.56733700 | H | 4.47406900  | -1.43377100 | -7.87898000 |
|    |             |             |             | H  | 11.94880700 | 4.22404300  | -5.47846900 | C | 8.64583000  | -4.34912100 | -4.33803400 | H | 2.73679300  | -1.37315100 | -8.11728300 |
|    |             |             |             | H  | 12.64412200 | 5.42038100  | -6.54262300 | C | 8.42949100  | -3.06587000 | -6.34016400 | H | 4.85160000  | 1.54593200  | -6.75844200 |
|    |             |             |             | H  | 10.83068600 | 4.96454600  | -8.24511400 | C | 8.51942200  | -4.30580300 | -5.72186400 | H | 5.83155100  | 0.66751900  | -7.92116200 |
|    |             |             |             | H  | 12.02577300 | 3.71776400  | -7.95201600 | C | 8.05207900  | -0.60253300 | -1.74353600 | H | 2.80798100  | 3.79926200  | 4.61711900  |
|    |             |             |             | O  | 8.29104700  | 4.76558700  | -6.93735200 | C | 6.92949900  | -1.36675200 | -1.40990900 | H | 3.73698700  | 0.44952300  | -9.39358500 |
|    |             |             |             | O  | 8.64747300  | 3.67133100  | -7.34664700 | C | 5.93674200  | 0.16324200  | -0.68105000 | O | 5.94778600  | 0.16927700  | -5.55223200 |
|    |             |             |             | O  | 7.80631600  | 2.76736300  | -7.84642300 | C | 8.35978800  | -1.41443000 | -0.14309800 | C | 3.35571700  | -0.79350900 | -6.17103500 |
| Zr | 1.83558100  | -3.33796300 | 1.61634700  | C  | 8.18393000  | 4.13430800  | -1.10032500 | C | 10.0016900  | 0.15564400  | 0.60769100  | O | 6.65419500  | -1.97960700 | -5.61703400 |
| C  | -0.01416000 | -4.45926000 | 2.37220100  | C  | 8.45811000  | 4.82212500  | 0.22729000  | C | 6.89955000  | -0.64565800 | 0.88027400  | B | 8.43893900  | 0.51775100  | -2.66457400 |
| H  | -0.30792300 | -4.24012800 | 3.404717800 | H  | 8.45047400  | 3.07759500  | -1.09336100 | F | 14.13251800 | 1.38459700  | -3.50829100 | H | 8.72652500  | 2.01727800  | -3.05038800 |
| H  | -0.86829500 | -4.21398700 | 1.72619400  | H  | 7.14915900  | 4.24385400  | -1.42096400 | H | 12.20761800 | 2.69076300  | -4.98148400 | H | 8.02259200  | 2.70169200  | -2.20472800 |
| H  | 0.16680400  | -5.53989500 | 2.29225500  | H  | 11.11985700 | 4.12939000  | -1.32436900 | H | 9.71933800  | 1.81909800  | -5.02678400 | H | 8.33066200  | 2.47403900  | -3.93259900 |
| C  | 2.21085000  | -0.96960900 | -0.46468400 | C  | 9.79261300  | 4.43184000  | 0.87965200  | F | 10.86961700 | -1.59101300 | -1.90396300 | H | 6.79239800  | 1.98978900  | -3.24211900 |
| C  | 1.37410000  | -5.24827000 | -2.34480200 | H  | 8.37566200  | 5.90942000  | 0.09632700  | F | 13.41011900 | -0.78248000 | -1.98570900 | O | 10.08701000 | 0.59235000  | -3.24510700 |
| C  | 1.56236600  | -5.13090600 | -3.86611400 | H  | 7.63738700  | 4.52920000  | 0.89430300  | H | 8.42268900  | -0.75029400 | -6.28458200 | O | 10.76646900 | 0.50746700  | -1.23289400 |
| C  | 1.20216300  | -6.02310200 | -1.91701700 | C  | 12.03549800 | 4.81269700  | 0.06378700  | F | 9.28995200  | -2.98920500 | -7.68146000 | O | 10.94180300 | 1.21403300  | -3.25081700 |
| C  | 3.45233300  | -5.56392500 | -2.11770000 | H  | 10.86868100 | 3.06488800  | -1.22580900 | H | 8.49437100  | -5.43407000 | -6.44387000 | C | 12.33501000 | 0.23921800  | -1.00140900 |
| C  | 3.76807000  | -2.79302500 | -4.41562300 | H  | 12.12511200 | 4.19039400  | -1.74500100 | F | 7.83188500  | -5.53532300 | -3.71866500 | C | 12.30017700 | 1.42613900  | -3.50945800 |
| C  | 3.02151200  | -5.26012700 | -4.34665600 | H  | 9.79112100  | 3.34903700  | 1.05869400  | F | 8.78597600  | -3.31949700 | -2.27307100 | C | 12.91951300 | 0.93963200  | -1.91036000 |
| H  | 1.12755800  | -4.18141400 | -1.19272600 | H  | 9.85834200  | 4.91200900  | -0.83627600 | F | 6.30837700  | -2.11357900 | -2.35292300 | C | 6.33367500  | -0.59772800 | -3.88945100 |
| H  | 0.97961800  | -5.92541900 | -3.34975100 | H  | 11.10214200 | 5.90219400  | -0.05501700 | C | 5.27704200  | -2.18415300 | 0.09547200  | C | 8.72197800  | -1.92315400 | -3.65844600 |
| C  | 3.99868300  | -4.18443900 | -4.84811000 | H  | 11.93150500 | 4.50754400  | 0.61434600  | F | 6.34870200  | -0.66285800 | 2.11238600  | C | 7.97504500  | -0.32453100 | -5.12522900 |
| H  | 4.32480700  | -2.03716900 | -3.85879000 | O  | 8.91422900  | 4.75848300  | -2.23224100 | H | 8.52717400  | 0.92344900  | 1.57825200  | C | 8.74651000  | -2.90225000 | -4.62864100 |
| H  | 2.71602100  | -2.50308000 | -4.04486300 | C  | 10.19583800 | 4.70845600  | -0.23410300 | F | 6.34824200  | 1.01116200  | -0.85511500 | C | 7.99459600  | -1.30395000 | -6.22387400 |
| H  | 3.03374000  | -5.25767800 | -5.44449100 | O  | 10.71971900 | 5.22849000  | -3.38671500 | C | 8.77354800  | 4.67494300  | -4.93876600 | C | 8.37890400  | -2.60596100 | -5.93459200 |
| H  | 3.40135000  | -6.24546600 | -4.0081500  | H  | 9.25329200  | 6.48720600  | -4.18103200 | C | 9.37653600  | 5.96634000  | -5.46169600 | C | 7.55492800  | 0.09995300  | -1.32272400 |
| H  | 5.02637000  | -4.49068200 | -0.6803100  | H  | 9.23600800  | 4.81738500  | -4.80176700 | H | 9.50582400  | 3.91229800  | -4.69752000 | C | 6.50359400  | -0.81815800 | -1.29604000 |
| H  | 3.94335100  | -4.10362300 | -2.74962500 |    |             |             |             | H | 8.13170600  | 4.84201500  | -0.07562000 | H | 7.20327000  | 0.80234800  | -0.12340700 |
| O  | 1.50753900  | -2.84561200 | -2.08005100 |    |             |             |             | C | 9.56538600  | 3.61913000  | -7.58488600 | C | 5.70261100  | -1.05098900 | -0.17137300 |
| O  | 1.58560300  | -3.95034700 | -1.56655800 |    |             |             |             | C | 10.49093100 | 5.77770700  | -6.49955700 | C | 6.95239900  | 0.60866400  | 1.01973400  |
| O  | 1.83585200  | -4.15358800 | -0.27458800 | C  | 0.92157100  | -0.60099700 | 0.42833000  | C | 9.79884800  | 6.46335500  | -4.58228100 | F | 5.93035700  | -0.33355900 | 0.99367700  |
| O  | -0.31958000 | -1.73058900 | -0.12199700 | C  | 0.52457300  | -0.47519700 | 1.78470000  | F | 10.06607000 | 5.07128200  | -7.79107900 | F | 13.01772500 | 2.14617000  | -3.97646900 |
| H  | -0.84171600 | -1.76242400 | 2.53115200  | C  | 2.82174300  | -0.38176100 | 1.69753300  | C | 10.23946700 | 3.08269400  | -6.90449300 | F | 10.46876900 | 1.68438400  | -4.45050900 |
| H  | 2.04836000  | -5.28379500 | 4.20907100  | H  | 3.86079600  | -0.30316200 | 1.98770100  | H | 9.54424900  | 3.07030900  | -8.52875300 | O | 10.11756600 | -0.62525300 | -0.29051100 |
| H  | 0.93630200  | -6.36403100 | 1.90865300  | C  | 1.69810600  | -0.35437400 | 2.57356800  | H | 11.30836900 | 5.20919000  | -6.03762200 | C | 12.70504100 | 0.26536300  | 0.10064600  |
| H  | 4.66374000  | -4.63752200 | 0.78857300  | C  | 2.08097500  | -4.27971200 | 3.64092600  | F | 7.59451100  | 0.90081600  | -5.61989900 | F | 7.66038900  | -0.97411600 | -7.49272100 |
| H  | 4.83688000  | -2.47841000 | 2.38137900  | C  | 2.95916100  | -3.18420500 | 3.83513900  | H | 10.92774000 | 6.76014000  | -6.75797600 | F | 8.40705200  | -3.53893700 | -6.89626200 |
| H  | 3.21527100  | -2.87536800 | 4.49953600  | C  | 2.54435900  | -5.01742000 | 2.51800700  | F | 9.29079300  | 5.65391300  | -8.31403600 | F | 9.12911200  | -4.17061500 | -4.32779100 |
| H  | 1.39890200  | -1.02184500 | 3.81921700  | C  | 3.96603600  | -3.24221600 | 2.82921600  | H | 10.91729400 | 5.01348100  | -8.47118400 | C | 8.74075200  | -1.96323200 | -4.12448600 |
| C  | 6.39871600  | 3.11920700  | -7.88647000 | C  | 3.71206000  | -4.38382700 | 2.02700100  | C | 8.80862100  | 4.06678400  | -5.90728400 | F | 6.17995200  | -1.54650500 | -2.38554800 |
| C  | 5.64018400  | 2.01898500  | -8.61173200 | Zr | 1.78710400  | -2.71171300 | 1.59071500  | C | 10.10320700 | 3.52088200  | -7.00414500 | C | 9.10302700  | -2.29296200 | -2.41736200 |
| H  | 6.05709400  | 3.23191500  | -6.85176500 | O  | -0.35796700 | -3.31239900 | 1.213674800 | H | 7.32473100  | 2.86226000  | -7.68000700 | C | 6.17995200  | -1.54650500 | -2.38554800 |
| H  | 6.29359700  | 4.08751700  | -8.38569600 | H  | -0.69269900 | -2.97251400 | 3.12351600  | O | 11.12132100 | 4.82987900  | -3.03341600 | F | 4.70902900  | -1.96323200 | -4.12448600 |
| C  | 4.68848800  | -1.72183400 | -7.86192000 | H  | -1.04956500 | -2.90246600 | 1.38784400  | O | 10.95557100 | 4.38059700  | -1.68651700 | F | 5.17534300  | -0.54140000 | 2.09305000  |
| C  | 5.67523800  | 0.65516700  | -7.90859200 | H  | -0.44379600 | -4.40703400 | 2.11278100  | H | 11.90470000 | 4.39117500  | -1.13366900 | F | 7.18241200  | 1.31599400  | 2.13746000  |
| H  | 4.59810400  | 2.35888800  | -8.69733800 | H  | 2.93201600  | -0.64759700 | -0.52162200 | H | 10.27127600 | 5.08289400  | -1.20355000 | F |             |             |             |

|   |             |             |              |   |             |            |             |    |             |             |             |    |             |             |             |
|---|-------------|-------------|--------------|---|-------------|------------|-------------|----|-------------|-------------|-------------|----|-------------|-------------|-------------|
| H | -0.48133900 | -5.36141700 | 1.99259400   | H | 9.90877900  | 5.06685400 | -1.83370300 | C  | 1.49066200  | 0.29047000  | 1.15788500  | C  | 0.36665000  | -0.41010900 | -0.33962900 |
| H | 2.57503000  | -1.13412600 | -0.22809000  | H | 11.26623680 | 5.41251800 | -1.59751300 | C  | 1.28675200  | -3.48702300 | 2.50610600  | C  | 0.14507800  | -0.23846900 | 1.05254300  |
| C | 1.77122700  | -5.19104100 | -2.38620500  | H | 10.55641600 | 6.73737500 | -2.09619500 | C  | 2.41393600  | -2.63433500 | 2.37182600  | C  | 1.76704000  | -0.37550600 | -0.57308700 |
| C | 2.15753600  | -4.98678200 | -3.85795500  | H | 11.38753700 | 4.43926800 | -3.61485500 | C  | 1.30115600  | -4.40072700 | 1.42056800  | C  | 2.16257000  | -0.20945900 | 0.67459200  |
| H | 2.42983200  | -5.92100600 | -1.89986800  |   |             |            |             | C  | 3.13574000  | -3.03159100 | 1.20796600  | H  | 3.48428300  | -0.14256300 | 0.82484700  |
| H | 0.75998800  | -5.61878400 | -2.31909300  |   |             |            |             | C  | 2.44879900  | -4.12695500 | 0.62976000  | C  | 1.41108000  | -0.12621000 | 1.68279200  |
| C | 3.97764000  | -2.34866800 | -4.40252000  |   |             |            |             | Zr | 0.93204100  | -2.06119700 | 0.40357800  | C  | 1.60555000  | -0.09735000 | 2.81240700  |
| C | 3.67224100  | -4.88621500 | -4.12642300  |   |             |            |             | C  | 1.15674000  | -2.19609600 | 1.30511400  | C  | 2.46832000  | -2.07902000 | 3.02240800  |
| H | 1.63546200  | -4.10262600 | -4.24064600  |   |             |            |             | H  | -1.27774400 | -1.74746800 | 2.29895800  | C  | 2.08666100  | -4.79992200 | 1.68831700  |
| H | 1.77522200  | -5.84324300 | -4.42856800  |   |             |            |             | H  | -1.36797900 | -1.69566700 | 0.63074800  | C  | 3.49573100  | -3.01855300 | 2.03520300  |
| C | 4.38383600  | -3.60692900 | -3.64886000  |   |             |            |             | H  | -1.44615100 | -3.25254900 | 1.38352000  | C  | 3.25910500  | -4.15133200 | 1.21820300  |
| H | 4.45298400  | -1.46146200 | -3.97805700  |   |             |            |             | H  | 2.01559000  | -0.34719300 | -2.07770300 | Zr | 1.32680600  | -2.50513500 | 0.79354200  |
| H | 2.89771600  | -2.18719600 | -4.39455000  |   |             |            |             | H  | -0.39008000 | -4.45558500 | -3.17769800 | C  | -0.81458800 | -3.06013000 | 1.36702900  |
| H | 3.84166100  | -4.98366800 | -5.26334400  |   |             |            |             | C  | -0.38349400 | -4.72465700 | -4.68747000 | H  | -1.13883200 | -2.73133500 | 2.36251400  |
| H | 4.16546300  | -5.75353800 | -3.66455800  |   |             |            |             | H  | -0.25822000 | -5.39662600 | -6.21252700 | H  | -1.50768600 | -6.25252500 | 0.63415600  |
| H | 5.46592800  | -3.74537600 | -3.75446200  |   |             |            |             | H  | 3.85623300  | -4.50219900 | 0.00944500  | H  | -0.92023700 | -4.15274300 | 1.32871800  |
| O | 1.19993500  | -3.41929100 | -2.58560200  |   |             |            |             | C  | 4.41028600  | -2.39739800 | 0.75175400  | C  | 2.26315900  | -0.51214500 | -1.52443500 |
| O | 1.66609900  | -2.80235800 | -1.99926200  |   |             |            |             | C  | 4.41962800  | -3.25316800 | -0.37602400 | C  | 0.81629000  | -4.58599200 | -3.10443800 |
| C | 1.73815800  | -3.92710600 | -1.53105100  |   |             |            |             | Zr | 1.96897000  | -2.77279100 | 0.16593200  | C  | 0.46227400  | -4.48555100 | -4.63561200 |
| O | 1.76557900  | -4.19495800 | -0.22710500  |   |             |            |             | C  | 0.55723200  | -4.32554900 | 1.05404400  | H  | 1.17737700  | -5.56989800 | -2.77125600 |
| H | -0.06777500 | -1.42459300 | -0.70802600  |   |             |            |             | H  | 0.54361600  | -4.38759800 | 2.14935600  | H  | -0.21104700 | -5.16435000 | -2.87053900 |
| H | -0.76750100 | -1.47041100 | 2.53367700   |   |             |            |             | H  | -0.46847700 | -4.11440000 | 0.72311800  | C  | 3.45389300  | -2.98155400 | -4.63399900 |
| H | 1.16166800  | -5.38454300 | 4.29359800   |   |             |            |             | H  | 0.84526200  | -5.31455900 | 0.67212000  | C  | 2.11401500  | -5.01570100 | 5.30729200  |
| H | 1.96286700  | -6.68618600 | 2.07772100   |   |             |            |             | H  | 0.93605000  | -0.30881700 | -1.63707300 | H  | 0.67329900  | -3.44106200 | -4.97278200 |
| H | 4.12981600  | -5.42874000 | 1.11018500   |   |             |            |             | C  | 0.81223900  | -4.20750000 | -3.97313400 | H  | -0.01752000 | -5.01649400 | -5.02690400 |
| H | 4.66994700  | -3.33863000 | 2.70690300   |   |             |            |             | C  | -0.05017900 | -3.74187600 | -5.15617200 | C  | 3.42742700  | -4.47373400 | -4.74200800 |
| H | 2.83623000  | -3.31471100 | 4.66993100   |   |             |            |             | H  | 1.46474200  | -4.83342600 | -4.31587300 | H  | 4.27951600  | -2.47385700 | -4.15459700 |
| H | 1.47833100  | -1.22273600 | 3.99051900   |   |             |            |             | H  | 0.23649800  | -4.82769500 | -3.17836600 | H  | 2.67221300  | -2.35901100 | -5.03555200 |
| C | 6.27445400  | 2.94846900  | -0.95084900  |   |             |            |             | C  | 1.74577000  | -1.41489000 | -4.93360600 | H  | 2.06661100  | -4.81346500 | -6.38133500 |
| C | 5.43791600  | 1.76137500  | -9.50397700  |   |             |            |             | C  | 0.76798000  | -3.30537900 | -6.38170400 | H  | 2.13658700  | -6.12371200 | -5.12128200 |
| H | 5.98292400  | 3.29532900  | -8.05465900  |   |             |            |             | H  | -0.71116700 | -2.92924300 | -4.82647200 | H  | 4.27301500  | -4.83130000 | -5.36324600 |
| H | 6.19680400  | 3.79530100  | -9.74142700  |   |             |            |             | H  | -0.71383400 | -4.56754700 | -5.43389600 | H  | 3.63793600  | -4.87772000 | -3.74565000 |
| C | 4.62935000  | -1.79410700 | -8.02879800  |   |             |            |             | H  | 1.98882000  | -2.43865000 | -0.62721400 | O  | 2.50880300  | -2.82027600 | -2.83753700 |
| C | 5.47961000  | 0.57488500  | -8.53184000  |   |             |            |             | H  | 2.54449000  | -0.67857200 | -4.89227300 | C  | 1.61476100  | -3.53836300 | -2.33752200 |
| H | 4.40410100  | 2.11794000  | -9.61431000  |   |             |            |             | H  | 0.78273900  | -0.90494800 | -5.03069100 | H  | 1.30292900  | -3.44821600 | -1.08911700 |
| C | 5.76965100  | 1.44793300  | -10.50323100 |   |             |            |             | H  | 0.10715900  | -2.76208900 | -7.06803800 | H  | -0.40189800 | -0.54331500 | -1.09103700 |
| C | 4.55959400  | -0.57701400 | -8.95855500  |   |             |            |             | H  | 1.11864300  | -4.19107100 | -6.92402000 | H  | -0.81706800 | -2.02782000 | 1.54927000  |
| H | 6.05215400  | -2.17861500 | -7.94048800  |   |             |            |             | H  | 2.30975800  | -1.87471900 | -6.91168400 | H  | 3.73661000  | -4.32845900 | 3.60412900  |
| H | 4.53791200  | -2.62236400 | -8.44268100  |   |             |            |             | H  | 2.85329900  | -3.05137300 | -5.75768200 | H  | 1.63401100  | -5.68574800 | 1.26092300  |
| H | 5.17601000  | 0.91669400  | -7.53482000  |   |             |            |             | O  | 1.77741500  | -1.94231900 | -3.54943500 | H  | 3.85838500  | -4.45372100 | 0.36853500  |
| H | 6.51191300  | 0.21549200  | -8.44808300  |   |             |            |             | C  | 1.41395700  | -3.11590500 | -3.12133000 | H  | 1.31924900  | -2.32518600 | 1.87327000  |
| H | 3.52336000  | -0.21924600 | -8.99476000  |   |             |            |             | O  | 1.58930500  | -3.34144600 | -1.89952000 | H  | 1.58307500  | -0.24635700 | 2.73897600  |
| H | 4.84202500  | -0.90203500 | -9.97420000  |   |             |            |             | H  | -1.02304000 | -1.61865800 | -0.31374200 | C  | 6.11817500  | 0.28585600  | -5.87432500 |
| O | 3.41909500  | -0.54751600 | -6.32731200  |   |             |            |             | H  | -0.28752500 | -1.81817800 | 2.26369900  | H  | 5.89269300  | 1.28160100  | -6.97870000 |
| C | 4.08716000  | -1.51524800 | -6.64007000  |   |             |            |             | C  | 3.07848800  | -5.21434500 | 1.97643800  | H  | 7.09371400  | -0.22195200 | -5.94058100 |
| O | 4.43135800  | -2.49363800 | -5.77849300  |   |             |            |             | H  | 3.74110300  | -5.37060200 | -0.62644300 | H  | 6.03241000  | 0.70662300  | -4.88514400 |
| B | 8.59886500  | 0.29504000  | -2.58454500  |   |             |            |             | H  | 4.79208300  | -2.99923500 | -1.36020600 | C  | 5.90215900  | -1.72208500 | -7.98701600 |
| C | 7.66164200  | 1.63395100  | -2.79708700  |   |             |            |             | H  | 4.78045300  | -1.38177200 | 0.78297700  | C  | 6.19386300  | 0.581264900 | -8.37612900 |
| H | 7.78453000  | 2.34659200  | -1.96857300  |   |             |            |             | H  | 3.71306100  | -2.75076900 | 2.85101900  | H  | 4.83750600  | 1.08262600  | -6.96936900 |
| H | 7.83873800  | 2.17594800  | -3.73050000  |   |             |            |             | H  | 2.11708500  | -0.63550900 | 2.53589500  | H  | 6.47973000  | 2.16773300  | -7.60485100 |
| H | 6.60492200  | 1.34021500  | -2.79873600  |   |             |            |             | H  | 7.48966500  | -2.41396700 | -4.66599000 | C  | 5.63796200  | -0.47442100 | -8.86524600 |
| C | 10.23752700 | 0.60046100  | -2.55564000  |   |             |            |             | C  | 9.12996500  | -2.59426100 | -4.68301100 | H  | 6.96196800  | -1.77749900 | -7.70968200 |
| H | 11.15964600 | -0.42598000 | -2.27995000  |   |             |            |             | C  | 8.82004100  | -3.80425700 | -4.77270200 | H  | 5.66792000  | -2.63627100 | -8.53398700 |
| C | 10.84903100 | 1.80279300  | -2.84323100  |   |             |            |             | C  | 9.94508700  | -1.46135100 | -4.77139900 | H  | 7.40832700  | 0.66823300  | -3.88380500 |
| C | 12.54478400 | -0.27601400 | -2.31910800  |   |             |            |             | C  | 11.20656800 | -3.89343700 | -4.90450400 | H  | 6.11499400  | 1.61359500  | -9.09770300 |
| C | 12.22270000 | 2.00444100  | -2.91070000  |   |             |            |             | H  | 11.32877700 | -1.50011000 | -4.90140000 | H  | 4.55475600  | -0.31883000 | -8.96053900 |
| C | 13.09746400 | 0.96413400  | -2.64174100  |   |             |            |             | H  | 11.96907800 | -2.73416400 | -4.96817500 | H  | 6.00412400  | -0.70530900 | -9.87007200 |
| C | 8.846390200 | -0.72734700 | -3.89526900  |   |             |            |             | C  | 6.66149400  | -3.79477200 | -4.23295400 | O  | 5.10225000  | -0.79248700 | -5.83963400 |
| C | 8.26065000  | -2.10149000 | -3.86375600  |   |             |            |             | C  | 6.97910800  | -4.44817100 | -3.03464400 | C  | 5.08056000  | -1.77596500 | -6.72125300 |
| C | 8.66170000  | -0.23395800 | -5.18925200  |   |             |            |             | C  | 5.12526700  | -4.28683500 | -4.85240400 | C  | 4.32787000  | -2.73359600 | -6.50125900 |
| C | 8.04684400  | -2.89491800 | -5.00094000  |   |             |            |             | C  | 6.23370200  | -5.48709000 | -2.48313300 | H  | 9.44521500  | -2.02034000 | -3.08912200 |
| C | 8.53813200  | -0.98878400 | -6.35100500  |   |             |            |             | C  | 4.73208700  | -5.32001500 | -4.33416300 | C  | 11.05147800 | -2.13989100 | -2.70966100 |
| C | 8.20450500  | -2.33380400 | -6.26086100  |   |             |            |             | C  | 5.08533700  | -5.92206400 | -3.13637100 | C  | 11.90898600 | -3.18647900 | -3.05450600 |
| C | 8.05013900  | -0.33591200 | -1.15504400  |   |             |            |             | C  | 6.93430200  | -1.37248000 | -3.48545200 | C  | 11.69565700 | -1.04472300 | -2.12367100 |
| C | 6.78038200  | -0.91830800 | -1.07817000  |   |             |            |             | C  | 5.59842600  | -0.95944900 | -3.49416100 | C  | 13.28239900 | -3.17402900 | -2.80426800 |
| C | 8.66432300  | -0.16969000 | 0.08762000   |   |             |            |             | C  | 7.63780200  | -0.98216800 | -2.34108600 | C  | 13.05797600 | -0.98657200 | -2.18420000 |
| C | 6.18503000  | -1.34705600 | 1.01026600   |   |             |            |             | C  | 4.99546400  | -0.21437900 | -2.48816100 | C  | 13.86363600 | -2.06798200 | -1.95040000 |
| C | 8.10020600  | -0.56218100 | 1.30347800   |   |             |            |             | C  | 7.07501700  | -0.23427200 | -1.30266800 | C  | 8.75205900  | -3.45818900 | -3.55698700 |
| C | 6.84560500  | -1.15575800 | 1.31007900   |   |             |            |             | C  | 5.74506100  | 0.15244500  | -1.37738800 | C  | 8.44732300  | -4.12230000 | -2.71168700 |
| F | 14.42239000 | 1.14174000  | -2.69666200  |   |             |            |             | C  | 13.30205600 | -2.80232600 | -5.09050700 | C  | 7.92864300  | -3.66769900 | -4.66117300 |
| F | 12.69888900 | 3.25339800  | -3.23760300  |   |             |            |             | F  | 12.04760300 | -0.36745600 | -4.96746000 | C  | 8.22390000  | -5.97858900 | -2.94545700 |
| F | 10.12200800 | 2.93976000  | -            |   |             |            |             |    |             |             |             |    |             |             |             |



|   |             |             |              |   |             |             |              |    |              |             |             |   |             |             |              |
|---|-------------|-------------|--------------|---|-------------|-------------|--------------|----|--------------|-------------|-------------|---|-------------|-------------|--------------|
| C | 5.78150700  | 0.08387900  | -9.38502200  | C | 4.11394500  | -3.78245300 | -3.96380700  | C  | 7.14985800   | 9.23426300  | -0.59296900 | F | 7.76055400  | -4.59433300 | -4.28476200  |
| H | 4.16484400  | 1.30541400  | -8.55759500  | H | 4.54854800  | -1.68995700 | -4.37029300  | H  | 6.48238900   | 9.54308000  | -2.64624900 | F | 7.62108200  | -2.89669400 | -2.27209500  |
| C | 5.41949300  | 2.24274300  | -9.35788600  | H | 2.91955700  | -2.18030300 | -4.85067000  | C  | 5.18506500   | 9.35592700  | -1.47289800 | F | 5.47454500  | -1.11684700 | -2.21779000  |
| H | 4.77352200  | -1.08378900 | -9.53509400  | C | 3.43718800  | -5.10845000 | -5.51310800  | C  | 5.88499500   | 8.75047000  | -0.83841200 | F | 4.20240200  | -1.86930700 | 0.01768700   |
| H | 5.85188900  | -2.56400600 | -8.34577900  | H | 3.57049700  | -5.87118400 | -3.94133200  | H  | 8.09064500   | 6.67045100  | -0.40634400 | F | 5.33205700  | -1.42135300 | 2.47108000   |
| H | 4.23578400  | -3.04730800 | -8.75827400  | H | 5.16528100  | -4.09329400 | -3.99533700  | H  | 9.74127000   | 6.90940800  | -0.97770700 | F | 7.80550100  | -0.24661400 | 2.61801000   |
| H | 6.67501200  | -0.27331800 | -8.86087400  | H | 3.89653800  | -3.51911100 | -2.92438200  | F  | 6.75991600   | 8.73848800  | 0.30793700  | F | 9.10662100  | 0.46705800  | 0.41825600   |
| H | 4.62595600  | 0.35860800  | -1.03884300  | H | 1.55928000  | -2.65615100 | -2.30375900  | H  | 7.16747000   | 10.30820700 | -0.36889300 | C | 8.56417300  | 5.02094300  | -5.26221000  |
| H | 3.75191300  | -0.68990600 | -9.60001600  | C | 1.36176700  | -3.78801100 | -1.89051600  | H  | 9.03861700   | 9.31021100  | -1.66766600 | C | 9.63415000  | 5.81041100  | -6.14649600  |
| H | 4.96946800  | -1.57835300 | -10.49424000 | O | 2.18942000  | -4.10203200 | -0.60670400  | H  | 9.18784500   | 8.97707000  | 0.04885700  | H | 8.71899300  | 4.32768600  | -4.70561000  |
| O | 3.92090400  | -0.65900400 | -6.79797700  | H | -0.48973300 | -1.27756200 | -0.44320600  | O  | 7.08572500   | 7.01773300  | -2.98485200 | H | 7.58301000  | 5.68327900  | -5.23101500  |
| C | 4.32029500  | -1.77291300 | -7.09217900  | H | -1.39776600 | -1.42318000 | 2.09652800   | C  | 8.34816600   | 6.83065100  | -2.53241000 | C | 8.59756800  | 2.66649100  | -7.116470800 |
| O | 4.36797200  | -2.80422000 | -6.24269300  | H | 0.25145300  | -5.47761800 | 3.81512400   | O  | 9.16008100   | 6.35943600  | -3.30456600 | H | 10.81263900 | 4.86895400  | -6.45296200  |
| B | 8.32827100  | -0.49650300 | -2.47806500  | H | 1.12724100  | -6.72478600 | 1.59695100   | C  | 3.41257400   | -5.54221100 | 0.82293300  | H | 9.16013400  | 6.16315600  | -7.07012100  |
| C | 9.96162200  | -0.19581100 | -2.50776500  | H | 3.39533100  | -3.55523500 | 2.54725000   | C  | 2.00025000   | -3.51931200 | 4.41086300  | H | 10.01468200 | 6.70553100  | -5.64289700  |
| C | 10.86301900 | -1.20495600 | -2.14562900  | H | 0.72950800  | -1.34766500 | 3.73793400   | C  | 0.46713900   | -2.14333400 | 2.40014300  | C | 10.56632400 | 3.80826200  | -7.53947200  |
| C | 10.58254700 | 0.93465700  | -3.03484600  | H | 5.74702300  | 1.66586200  | -7.46077000  | C  | 1.05098700   | -1.37536600 | 0.84983500  | H | 9.78842200  | 2.34776400  | -6.13499300  |
| C | 12.24673700 | -1.09921200 | -2.25654600  | C | 5.19668300  | 1.26378700  | -8.41438100  | H  | 1.73498500   | -1.56285700 | 2.07686000  | H | 9.75183700  | 1.78986000  | -7.99774400  |
| C | 11.95901300 | 1.08560100  | -3.18493900  | C | 5.62238000  | 0.89536300  | -6.70285800  | H  | 2.78465100   | -1.37133100 | 2.25018800  | H | 11.13939100 | 4.37844500  | -5.52672300  |
| C | 12.80644100 | 0.06223600  | -2.78347500  | H | 5.33662700  | 2.60648500  | -7.09518000  | C  | 0.97581000   | -2.03918300 | 3.03677100  | H | 11.65309400 | 5.49150100  | -6.78312600  |
| C | 8.15571600  | -1.50133900 | -3.79308200  | C | 4.93833800  | -2.27672200 | -8.37054200  | C  | 1.88970200   | -6.01433900 | 2.56533200  | H | 10.23774900 | 4.29325700  | -8.46881300  |
| C | 7.93859300  | -2.88243700 | -3.77139200  | C | 5.78993100  | -0.03225200 | -9.43177800  | C  | 2.52605000   | -4.90640400 | 3.15396100  | F | 11.53077800 | 3.33991900  | -7.76726300  |
| C | 8.33993100  | -0.99469300 | -5.07844700  | H | 4.11867000  | 1.15067000  | -8.65945900  | C  | 2.36081700   | -6.14618400 | 1.23224400  | O | 7.63688500  | 4.04294300  | -6.71125900  |
| C | 7.83655000  | -3.66891600 | -4.92233700  | H | 5.33136000  | 2.10570500  | -9.50522200  | C  | 3.43747400   | -4.35642500 | 2.18465700  | C | 8.14033200  | 3.04272300  | -7.24460200  |
| C | 8.32945400  | -1.73342700 | -6.25017300  | H | 4.84390000  | -1.25653500 | -9.51291700  | C  | 3.20267200   | -5.12967600 | 1.00231800  | C | 7.14787800  | 2.21129200  | -7.96414900  |
| C | 7.99884100  | -3.09360100 | -6.17563000  | H | 5.97861300  | -2.58481900 | -8.20333400  | Zr | 1.07349700   | -3.90436900 | 1.30159400  | C | 7.09952000  | 1.496562700 | -2.80610100  |
| C | 8.32620300  | -1.15106800 | -1.06620300  | H | 4.40998700  | -3.19835900 | -8.64766600  | C  | -0.85104300  | -5.06192100 | 1.75953600  | C | 7.20624600  | 2.63899200  | -2.00313200  |
| C | 6.47324200  | -1.68415500 | -1.02628900  | H | 6.70680000  | -0.31604000 | -8.90226200  | C  | -1.09386200  | -5.17631600 | 2.82430200  | C | 6.08413200  | 1.57031500  | -3.76210000  |
| C | 8.39425000  | -1.08904400 | 0.17997400   | H | 6.10913300  | 0.20833400  | -10.45228100 | H  | -1.69936200  | -4.55795200 | 1.27667400  | C | 6.41091500  | 3.70626400  | -2.14961500  |
| C | 5.86259800  | -2.16591600 | 0.12343400   | H | 3.80510900  | -0.91994600 | -9.61671500  | H  | -0.76806300  | -6.06832200 | 1.32699800  | C | 5.27530300  | 2.69344300  | -3.95387900  |
| F | 7.80896400  | -1.53708900 | 1.36706300   | H | 5.07993700  | -1.80276000 | -10.43438600 | H  | 1.50258400   | -1.09092100 | -0.09128400 | C | 5.43953400  | 3.80697200  | -3.14280800  |
| C | 6.52961400  | -2.07609200 | 1.33891100   | H | 3.87488200  | -0.72315600 | -6.82823800  | C  | 4.05724200   | -4.24921400 | -3.06412000 | F | 4.35458800  | 2.71211400  | -4.93521400  |
| F | 14.13382200 | 0.18218600  | -2.91538600  | H | 4.36110200  | -1.82040600 | -7.04159600  | C  | 1.04134900   | -4.02271000 | -4.46756600 | F | 4.82660100  | 0.54158000  | -4.59172400  |
| F | 12.46009700 | 2.21030600  | -3.73538000  | O | 4.45318700  | -2.79331200 | -6.12784700  | O  | 0.38942000   | -5.31660900 | -2.82179100 | F | 4.67928700  | 4.90662500  | -3.31093900  |
| F | 9.85734700  | 1.99791100  | -3.49974400  | C | 8.17857700  | -0.05289900 | -2.46003200  | H  | -0.597565100 | -3.87235100 | -3.02811600 | F | 6.58801600  | 4.40636200  | -1.34136200  |
| F | 10.39457300 | -2.37706400 | -1.67494400  | B | 8.17857700  | -0.05289900 | -2.46003200  | H  | 4.22867900   | -3.42984100 | -4.21541800 | C | 8.12908200  | 2.69825900  | -1.02107500  |
| F | 13.07473400 | -2.10761400 | -1.87833600  | C | 10.71154100 | -0.66569100 | -1.98554100  | C  | 5.19743600   | -4.94484800 | -4.83407800 | F | 5.98705300  | 7.66292900  | -2.64284100  |
| F | 8.59131100  | 0.33771900  | -5.24036500  | C | 10.40538300 | 1.40897200  | -3.02021900  | C  | 4.21669300   | -4.57521400 | -4.21541800 | C | 6.23715500  | 9.13540500  | -2.34586800  |
| F | 8.45224000  | -1.13957800 | -7.45199200  | C | 12.09475900 | -0.52737100 | -2.02525500  | H  | 0.24406600   | -4.20121600 | -5.20083900 | C | 5.86067000  | 7.06878400  | -1.74464500  |
| F | 7.87907200  | -3.82292500 | -7.29567900  | C | 11.78313300 | 1.58768000  | -3.12869500  | H  | 1.33251200   | -2.97321100 | -4.57521400 | C | 5.13792500  | 7.53013200  | -3.31250500  |
| F | 7.55158300  | -4.97590400 | -4.82186000  | C | 12.64060200 | 0.61497900  | -3.26201300  | H  | 0.24406600   | -4.20121600 | -5.20083900 | C | 6.85858000  | 7.29179800  | -1.50845100  |
| F | 7.78591700  | -3.55035200 | -2.61451600  | C | 8.09061000  | -1.13560000 | -3.71947900  | H  | 3.57539100   | -2.58009300 | -4.02211900 | F | 7.19307200  | 9.40215300  | -1.17535900  |
| F | 5.73434200  | -1.75039200 | -2.15889900  | C | 7.91973700  | -2.51966500 | -3.62684200  | H  | 2.44767600   | -4.80736700 | -5.89934100 | H | 6.59431600  | 9.62386300  | -3.26237200  |
| F | 4.62395800  | -2.69779900 | 0.07433400   | C | 8.31937400  | -0.69474200 | -5.02277000  | H  | 1.89401900   | -5.99044900 | -4.73153300 | H | 5.26105700  | 9.85314800  | -2.11852300  |
| F | 5.93301800  | -2.49343800 | 2.47217800   | C | 7.90491100  | -3.37420100 | -4.73258700  | H  | 4.21809400   | -5.56818700 | -4.29945200 | H | 8.00924200  | 6.81043200  | -0.76263800  |
| F | 8.46627600  | -1.43832100 | 2.53189000   | C | 8.33532400  | -1.50168200 | -6.15074800  | H  | 3.20964400   | -4.88261900 | -2.95469400 | H | 9.67213300  | 9.23579900  | -1.33393700  |
| F | 8.09318900  | 4.29371900  | -9.89917600  | C | 8.10650200  | -2.86517700 | -6.00840000  | O  | 1.88106000   | -2.54043800 | -2.10418100 | H | 7.62575900  | 10.48461700 | -1.01696200  |
| C | 8.94532700  | 5.34696000  | -5.67435400  | C | 7.57612800  | -0.63744200 | -1.03185700  | C  | 1.19073200   | -3.53292000 | -1.93222300 | H | 9.10093900  | 9.29851400  | -2.21495400  |
| H | 8.65332200  | 3.65800900  | -4.30268600  | C | 6.29871300  | -1.20518200 | -1.00553400  | O  | 0.97589800   | -4.07830900 | -0.74024500 | H | 9.20593200  | 6.08877900  | -4.47650600  |
| H | 7.25048500  | 4.73846700  | -4.46203600  | C | 8.15170600  | -0.47308400 | 0.23101300   | O  | 1.07918100   | -1.74197400 | 0.28927800  | O | 7.07369000  | 7.03397400  | -3.39212200  |
| C | 9.49331400  | 2.48899400  | -6.88838300  | C | 5.65155400  | -1.62128400 | 0.15020900   | H  | -1.18645400  | -2.47709400 | 2.86137300  | C | 8.26379000  | 6.78721300  | -2.87119900  |
| C | 10.29344900 | 4.84436400  | -6.22047100  | C | 7.53063000  | -0.85783600 | -4.42211200  | H  | 1.15105100   | -6.64266300 | 3.04365300  | O | 9.07867500  | 6.14991100  | -3.55355500  |
| H | 8.35948000  | 5.83226600  | -6.46341800  | C | 6.26761600  | -1.43307700 | 1.38113400   | H  | 2.02687200   | -6.87979800 | 0.50949100  |   |             |             |              |
| C | 10.13578300 | 6.11655000  | -4.91419200  | F | 13.96901900 | 0.76535300  | -2.72293500  | H  | 4.09648500   | -3.51178600 | 2.32636100  |   |             |             |              |
| C | 9.16889200  | 3.80276100  | -7.33937600  | F | 12.27990400 | 2.66803100  | -3.72836200  | H  | 2.41949700   | -4.55293800 | 4.16889400  |   |             |             |              |
| H | 9.89151400  | 2.19016300  | -5.90676800  | F | 9.66284100  | 2.41351700  | -3.56776100  | H  | 1.00268700   | -2.25614000 | 4.07721900  |   |             |             |              |
| H | 8.62322900  | 1.66905400  | -7.56771000  | O | 10.25405900 | -1.81952500 | -1.45800400  | H  | 5.92716700   | 2.44996800  | -0.85519400 |   |             |             |              |
| H | 10.87963300 | 4.41259800  | -5.39744400  | C | 7.57612800  | -0.63744200 | -1.03185700  | C  | 5.34091200   | 1.24957500  | -8.74164000 |   |             |             |              |
| H | 10.86323600 | 5.70222100  | -6.59545800  | C | 8.54795700  | -0.97346700 | -7.37750100  | H  | 5.58452400   | 2.59061300  | -7.04371700 |   |             |             |              |
| H | 9.63811400  | 4.22215100  | -8.20418500  | F | 8.53561800  | 0.63331800  | -5.24792400  | H  | 5.82758200   | 3.37707000  | -8.61890800 |   |             |             |              |
| H | 11.17022100 | 3.53391400  | -7.71971200  | F | 7.66558700  | -4.68414000 | -4.56857700  | C  | 4.88663100   | -2.53819800 | -7.78831800 |   |             |             |              |
| F | 7.39725900  | 3.39135500  | -5.94028600  | F | 7.73075700  | -3.12554300 | -2.44092000  | C  |              |             |             |   |             |             |              |



|   |             |              |             |    |             |             |              |    |             |             |             |   |             |             |             |
|---|-------------|--------------|-------------|----|-------------|-------------|--------------|----|-------------|-------------|-------------|---|-------------|-------------|-------------|
| C | 4.10936700  | -2.23316300  | -7.70216300 | C  | 0.73045300  | -3.51542500 | 3.09636100   | O  | 6.71490100  | 3.34475800  | -5.85663100 | F | 12.54845700 | 2.97086700  | -2.79726400 |
| C | 4.79582200  | 0.23179600   | -7.89552600 | C  | 1.87688900  | -2.73453600 | 3.38407100   | C  | 7.44647400  | 2.68519700  | -6.68085800 | F | 9.91379900  | 2.92566200  | -3.05254400 |
| H | 4.24027000  | 1.79133900   | -8.49115300 | C  | 1.13231400  | -4.58895500 | 2.25475900   | C  | 6.86227200  | 1.87238800  | -7.47788100 | F | 9.84518900  | -1.46843800 | -1.20459300 |
| H | 4.73062700  | 1.53324500   | -9.64073100 | C  | 2.98932200  | -3.32098200 | 2.71449800   | C  | 7.20383400  | 0.76392600  | -2.49995700 | F | 12.49753600 | -1.38117100 | -0.94196600 |
| C | 3.95762100  | -0.91701100  | -8.47367400 | C  | 2.52525500  | -4.47522900 | 2.03286500   | F  | 7.34071900  | 1.77448500  | -1.53996600 | F | 8.73013600  | 1.33044200  | -5.07009700 |
| H | 4.58925000  | -2.53802600  | -7.61085200 | Zr | 1.46153300  | -2.42987000 | 0.85626900   | C  | 6.07238200  | 0.90261000  | -3.30409900 | F | 8.87036600  | -0.20702200 | -2.24634900 |
| H | 3.60732000  | -3.04877400  | -8.24205300 | C  | -0.82371400 | -2.29292600 | 0.81294500   | C  | 6.46881600  | 2.84869800  | -1.41166200 | F | 8.35879800  | -2.89745800 | -7.08909100 |
| H | 4.58982900  | 0.32360200   | -6.82203200 | H  | -1.27778400 | -1.68753300 | 1.60822300   | C  | 5.16927500  | 1.96427200  | -3.21230900 | F | 7.71066300  | -3.99642300 | -6.65798400 |
| H | 5.86435000  | 0.00583400   | -7.99905400 | H  | -1.13421600 | -1.86447600 | -0.14970500  | C  | 5.37059900  | 2.95180100  | -2.25811200 | F | 7.52994200  | -2.50077000 | -2.49369000 |
| H | 4.23474700  | -0.63299800  | -8.46211900 | H  | -1.24148000 | -3.30599100 | 0.88531000   | F  | 4.45717300  | 2.06260800  | -4.07143600 | F | 5.43215900  | -0.69592700 | -2.37506100 |
| O | 4.64160700  | -1.35993200  | -5.97448700 | C  | 1.67755200  | -5.11516200 | -2.67992400  | F  | 5.78850200  | 0.00744800  | -4.27932200 | F | 3.98546100  | -1.52997200 | -0.47527300 |
| C | 4.37788600  | -2.17091800  | -6.31769800 | C  | 2.00221200  | -5.24428800 | -1.17656400  | F  | 6.71020200  | 3.82422100  | -0.50383200 | F | 7.45503400  | -0.21155200 | -2.65187400 |
| C | 3.94443300  | -3.15185500  | -5.52349900 | H  | -2.32893400 | -5.75393200 | -2.06940400  | F  | 8.38461400  | 1.75502700  | -0.68809600 | F | 8.92515600  | 0.59113200  | 0.59316100  |
| B | 7.79448000  | 0.38158400   | -2.51474600 | H  | 0.65692600  | -5.47054300 | -2.47961400  | H  | 7.63439900  | 5.99620200  | -2.20169700 | C | 8.59355500  | 4.87627100  | -5.13079300 |
| C | 9.43698700  | 0.37718400   | -2.25998000 | C  | 4.22339000  | -2.98887800 | -4.89988000  | C  | 6.59552400  | 6.85881400  | -1.74497000 | C | 9.19502100  | 5.80431100  | -6.14239000 |
| C | 10.07637800 | -0.76047100  | -1.75168000 | C  | 3.49487200  | -5.43433800 | -4.50961000  | H  | 5.65298200  | 6.31848900  | -1.59106100 | H | 9.00861500  | 3.90057700  | -4.92570500 |
| C | 10.32048100 | 1.37785800   | -2.65412500 | H  | 1.59860500  | -4.36939800 | -4.69834300  | H  | 6.88814300  | 7.37239500  | -0.81209600 | H | 7.62993000  | 5.10099800  | -4.69965600 |
| C | 11.55476400 | -0.88571000  | -1.60500000 | H  | 1.46463000  | -6.11556100 | -4.57223000  | H  | 4.64453600  | 7.61609700  | -2.51940500 | C | 9.23656200  | 2.93810000  | -7.77842100 |
| C | 11.70542500 | 1.30206100   | -2.53092800 | C  | 4.44128800  | -4.28296100 | -1.13025100  | H  | 7.72895200  | 5.29722800  | -1.53552100 | C | 10.33095100 | 5.20164300  | -6.98844100 |
| C | 12.28635000 | 0.16052400   | -1.99733500 | C  | 4.84437900  | -2.18373700 | -4.50383000  | C  | 4.84437900  | -2.18373700 | -4.50383000 | C | 8.38275000  | 6.17193000  | -6.24634900 |
| C | 7.68172500  | -0.57037400  | -3.86875500 | C  | 3.18474400  | -2.65828600 | -4.87261400  | H  | 9.55516300  | 6.69108700  | -5.60735900 | H | 9.55516300  | 6.69108700  | -5.60735900 |
| C | 7.35435500  | -1.92933400  | -5.88245600 | H  | 3.59106900  | -5.62452000 | -5.58678000  | C  | 9.90772300  | 4.28018300  | -8.14710600 | C | 9.90772300  | 4.28018300  | -8.14710600 |
| C | 8.06955800  | -0.07239600  | -5.11637100 | H  | 3.84833500  | -6.34686100 | -4.00879300  | C  | -0.55340900 | -1.96577400 | 0.63775500  | H | 9.75603500  | 2.45617200  | -6.94224200 |
| C | 7.36471500  | -2.71884600  | -5.03331100 | H  | 5.47765400  | -4.61143400 | -4.27836300  | C  | -0.77812100 | -2.19785100 | 0.20270600  | H | 9.28992100  | 2.25495400  | -6.62041400 |
| C | 8.08876100  | -0.81692200  | -6.28874600 | C  | 4.35094100  | -4.03099500 | -3.06551700  | C  | 0.79752400  | -1.56470600 | 0.46692700  | H | 11.03021900 | 4.66493600  | -6.33209700 |
| C | 7.72423300  | -2.15735500  | -6.25044700 | O  | 1.84086900  | -2.70210400 | -2.81381000  | C  | 1.41790300  | -1.57258800 | 1.74092300  | H | 10.90130000 | 6.03134800  | -7.42325800 |
| C | 6.92393800  | -0.16420600  | -1.21316100 | C  | 1.73499000  | -3.69766400 | -2.11387400  | C  | 2.44883000  | -1.31663000 | 1.94205600  | H | 9.25880000  | 4.83629900  | -8.83665000 |
| C | 5.59133300  | -0.55833400  | -1.37027600 | O  | 1.61991500  | -3.67198900 | -2.78954000  | C  | 0.84219400  | -1.96400000 | 2.70368400  | H | 10.81244400 | 4.03684500  | -8.71616200 |
| C | 7.35639600  | -0.13440100  | 0.11545700  | H  | 1.03661000  | -0.51150800 | -1.66543200  | C  | 1.66534200  | -5.82825200 | 3.29169500  | O | 7.36300100  | 3.89867600  | -6.52312700 |
| C | 4.76287200  | -0.95012300  | -0.32451700 | H  | -0.05069100 | 0.42867900  | 0.62787500   | C  | 2.33263900  | -4.62850400 | 2.66178000  | C | 7.78482400  | 3.07949900  | -7.38741200 |
| C | 6.55764200  | -0.50284100  | 1.19946400  | H  | -0.27405200 | -3.32817600 | 3.45071200   | C  | 2.14721100  | -6.24267900 | 1.64615700  | O | 6.97503800  | 2.31393800  | -8.08678200 |
| C | 5.25028100  | -0.91216700  | 0.97625500  | H  | 0.48165200  | -5.34700100 | 1.83770200   | C  | 3.23320500  | -4.30060700 | 1.23100700  | C | 7.23683700  | 1.94513100  | -2.61796000 |
| C | 13.61710100 | 0.06509000   | -1.86888200 | C  | 3.12664800  | -5.12319400 | 1.40887600   | C  | 3.12413900  | -5.30918700 | 1.22015100  | C | 7.38561600  | 3.03820400  | -1.75517200 |
| F | 12.48536000 | 2.33390400   | -2.93344000 | H  | 4.01554900  | -2.98273200 | -4.87591000  | Zr | 0.88153900  | -4.01609400 | 1.23931100  | C | 6.13411000  | 2.11158000  | -3.55562900 |
| F | 9.86248000  | 2.53226700   | -3.21064000 | H  | 1.90561100  | -1.85496100 | -4.01425800  | H  | -1.03616100 | -5.17667200 | 1.71189800  | C | 6.62869200  | 4.20609700  | -1.91933700 |
| F | 9.32441000  | -1.82558000  | -1.37204200 | H  | 1.83349600  | 0.29826800  | 2.54289100   | H  | -1.36299900 | -5.14413900 | 2.75955000  | C | 5.41965900  | 3.25687100  | -3.65076500 |
| F | 11.99358400 | -2.00373300  | -1.09572400 | C  | 5.40509300  | 1.53615000  | -7.35167900  | C  | -0.85599000 | -4.78073600 | 1.09639200  | C | 5.62430400  | 4.31831800  | -2.77854100 |
| F | 8.45556200  | 1.22538100   | -5.23864700 | C  | 4.91007600  | 1.07293700  | -8.70636200  | H  | -0.89080000 | -6.23149700 | 1.44171400  | F | 4.46520300  | 3.34344000  | -4.95927000 |
| F | 8.43000100  | -0.25027000  | -7.46370200 | H  | 5.35787400  | 0.75641300  | -6.59208700  | H  | 1.29138100  | -1.37391300 | -4.07629100 | F | 9.52840500  | 1.15479700  | -4.46455700 |
| F | 7.69495300  | -2.88744600  | -7.36715000 | H  | 4.88905600  | 2.42838600  | -6.99703800  | C  | 0.73631500  | -4.93223500 | -3.09170000 | F | 4.88704000  | 5.42854500  | -2.85997000 |
| F | 7.02377400  | -0.401502400 | -4.97499900 | C  | 4.94294800  | -2.54056300 | -8.52749100  | C  | 1.34358400  | -4.70350700 | -4.84238000 | F | 6.86037800  | 5.20110700  | -0.96816500 |
| F | 6.09919200  | -2.57262800  | -2.75359200 | C  | 5.64593500  | -0.15007800 | -9.31846000  | H  | 0.84064800  | -5.97681600 | -2.77178000 | F | 8.33059300  | 3.00736000  | -4.78691900 |
| F | 5.03599300  | -0.56947000  | -2.60218700 | H  | 3.85340500  | 0.83619100  | -8.54420500  | H  | -0.34715800 | -4.74578700 | -3.12052900 | O | 9.36183300  | 5.58810200  | -3.44317100 |
| F | 3.49925400  | -1.35319800  | -0.55566900 | H  | 4.94059600  | 1.92349400  | -9.39895200  | C  | 4.36686500  | -3.55045000 | -4.19330900 | H | 10.77358000 | 8.59365900  | -3.88178000 |
| F | 4.46184200  | -1.27044200  | 2.01137600  | C  | 4.78028000  | -1.41536600 | -9.55902700  | C  | 2.67450700  | -5.43417300 | -4.74724800 | H | 10.92555700 | 6.28967600  | -3.20294600 |
| F | 7.03819200  | -0.45425700  | 2.45216000  | H  | 5.99346300  | -2.84758100 | -8.44272200  | H  | 1.46007800  | -3.62958200 | -4.65985500 | H | 11.36913300 | 4.93117400  | -3.38601900 |
| F | 8.60344700  | 0.26933000   | 0.43583900  | H  | 4.40543500  | -3.43942300 | -8.85699800  | H  | 0.62206300  | -5.06342500 | -5.22941500 | H | 11.04218700 | 6.00456600  | -4.05474800 |
| O | 10.67939600 | 5.19843300   | -3.68279100 | H  | 6.50948000  | -0.41557300 | -8.70051600  | C  | 3.90018100  | -4.97978000 | -3.93529400 | H | 9.14350600  | 4.82828500  | -2.83168200 |
| C | 10.15972800 | 5.38223700   | -5.18583400 | H  | 6.06941700  | 0.16324900  | -10.27932700 | H  | 5.21812500  | -3.30796200 | -3.55401600 |   |             |             |             |
| C | 8.92049000  | 3.20115300   | -7.96424500 | C  | 3.72169800  | -1.13751500 | -9.62905600  | H  | 3.57415400  | -2.82253800 | -4.03015100 |   |             |             |             |
| C | 10.00415600 | 4.10976400   | -5.83801100 | H  | 5.04752300  | -1.84142700 | -10.53346900 | C  | 5.12526700  | -5.34137600 | -5.81537500 |   |             |             |             |
| H | 9.98124800  | 6.21581800   | -5.39727200 | C  | 3.95417800  | -1.12397200 | -6.82152600  | C  | 5.25734600  | -6.50952600 | -4.56883600 |   |             |             |             |
| H | 11.55230900 | 5.63924300   | -5.60957900 | C  | 4.44433100  | -2.19548100 | -7.13569900  | C  | 4.73655300  | -5.65905000 | -4.14716200 |   |             |             |             |
| C | 9.86886700  | 4.24457200   | -7.36280300 | O  | 4.61704600  | -3.21671700 | -6.28913500  | C  | 3.70057300  | -5.06114300 | -2.85943400 |   |             |             |             |
| H | 9.14524700  | 2.18851400   | -7.10707700 | B  | 8.28631100  | -0.49860400 | -2.49954000  | C  | 1.92368000  | -3.01643100 | -2.19885900 |   |             |             |             |
| H | 9.01450400  | 3.16728300   | -9.05689600 | C  | 9.86492400  | 0.01385800  | -2.57612600  | C  | 1.27866000  | -4.03161800 | -1.98531700 |   |             |             |             |
| H | 9.01928900  | 3.91134700   | -5.40700400 | C  | 10.90201700 | -0.89311200 | -2.32411700  | O  | 0.95792100  | -4.45098200 | -0.76721700 |   |             |             |             |
| H | 10.63165100 | 3.23499400   | -5.59170500 | C  | 10.31105200 | 1.24729800  | -3.04711300  | H  | -1.28416100 | -2.08586400 | -0.15253000 |   |             |             |             |
| H | 9.48585600  | 5.24240300   | -7.60990300 | C  | 12.25417100 | -0.60448900 | -2.48431800  | H  | -1.71069200 | -2.50794400 | 2.47166000  |   |             |             |             |
| H | 10.85620100 | 4.15436100   | -7.83351300 | H  | 11.64921400 | 1.58182700  | -3.24289900  | H  | 0.91512900  | -6.33592000 | 3.50790500  |   |             |             |             |
| H | 7.07858300  | 4.43655600   | -6.96719300 | C  | 12.63673000 | 0.65098100  | -2.95059400  | C  | 1.12523600  | -7.11047700 | 1.09202000  |   |             |             |             |
| C | 7.46448000  | 3.49328000   | -7.63426100 | C  | 8.19371000  | -1.46278300 | -3.85113800  | C  | 3.66282700  | -5.33545600 | 0.28169000  |   |             |             |             |
| C | 6.60089000  | 2.58387700   | -8.18717900 | C  | 8.14562700  | -2.8        |              |    |             |             |             |   |             |             |             |

|                                                                                             |             |             |             |
|---------------------------------------------------------------------------------------------|-------------|-------------|-------------|
| H                                                                                           | 5.04883700  | -2.26819100 | -7.58890000 |
| H                                                                                           | 3.42892800  | -2.59136900 | -8.17089500 |
| H                                                                                           | 4.77950100  | 0.52625900  | -6.55090000 |
| H                                                                                           | 5.96422600  | 0.21477200  | -7.82139400 |
| H                                                                                           | 2.93771400  | -0.11326000 | -8.18618100 |
| H                                                                                           | 4.18488600  | -0.59400000 | -9.34183900 |
| O                                                                                           | 2.74421400  | -0.97211600 | -5.74985600 |
| C                                                                                           | 3.47456200  | -1.84053900 | -6.18422800 |
| C                                                                                           | 3.88061700  | -2.90875800 | -5.48089300 |
| B                                                                                           | 7.93063200  | 0.33597000  | -2.38133100 |
| C                                                                                           | 9.58403800  | 0.32284600  | -2.21214700 |
| C                                                                                           | 10.24205900 | -0.87412900 | -1.90322600 |
| C                                                                                           | 10.45113600 | 1.37423500  | -2.50456000 |
| C                                                                                           | 11.62532500 | -1.02253900 | -1.86158700 |
| C                                                                                           | 11.84099200 | 1.27370100  | -2.49244600 |
| C                                                                                           | 12.43991100 | 0.06576200  | -2.16282000 |
| C                                                                                           | 7.74555700  | -0.53726400 | -3.78791500 |
| C                                                                                           | 7.37322200  | -1.88430100 | -3.86552700 |
| C                                                                                           | 8.11900700  | 0.00318900  | -5.01962500 |
| C                                                                                           | 7.33745200  | -2.61727200 | -5.05407800 |
| C                                                                                           | 8.09930900  | -0.68326400 | -6.22535400 |
| C                                                                                           | 7.69365900  | -2.01115100 | -6.25049900 |
| C                                                                                           | 7.10691500  | -0.30541700 | -1.09736200 |
| C                                                                                           | 5.74439000  | -0.58950200 | -1.23071900 |
| C                                                                                           | 7.60373800  | -0.47516600 | 0.19695500  |
| C                                                                                           | 4.93571500  | -1.05014800 | -0.19898600 |
| C                                                                                           | 6.82720000  | -0.91972000 | 1.26941000  |
| C                                                                                           | 5.48362700  | -1.20548700 | 1.06919200  |
| F                                                                                           | 13.77406300 | -0.05377300 | -2.14555900 |
| F                                                                                           | 12.60449300 | 2.33933900  | -2.81642700 |
| F                                                                                           | 9.98586900  | 2.60270400  | -2.85562000 |
| F                                                                                           | 9.51939600  | -1.98064400 | -1.63639800 |
| F                                                                                           | 12.18120900 | -2.02206600 | -1.54999900 |
| F                                                                                           | 8.52846900  | 1.30453200  | -5.10037300 |
| F                                                                                           | 8.43312900  | -0.06261000 | -7.38269200 |
| F                                                                                           | 7.61684100  | -2.67840200 | -7.41218500 |
| F                                                                                           | 6.95316900  | -3.90083400 | -5.05161000 |
| F                                                                                           | 7.00720600  | -2.57449100 | -2.76909100 |
| F                                                                                           | 5.14238600  | -0.42243000 | -2.43238500 |
| F                                                                                           | 3.63757600  | -1.33726300 | -0.41063400 |
| F                                                                                           | 4.71771300  | -1.63093800 | 2.09495300  |
| F                                                                                           | 7.36484400  | -1.06230900 | 2.48993800  |
| F                                                                                           | 8.89043800  | -0.20763300 | 0.49349500  |
| F                                                                                           | 9.95373700  | 5.58047100  | -4.19252300 |
| C                                                                                           | 11.15678100 | 4.86688000  | -4.79446000 |
| C                                                                                           | 9.31883800  | 3.11323400  | -7.71287500 |
| C                                                                                           | 10.79826500 | 3.65248800  | -5.06828600 |
| H                                                                                           | 11.77048600 | 5.58154100  | -5.63778700 |
| H                                                                                           | 11.75737500 | 4.52254100  | -3.94576300 |
| O                                                                                           | 4.42813500  | 3.99972600  | -7.13196000 |
| H                                                                                           | 9.48255800  | 2.05139600  | -7.49316800 |
| H                                                                                           | 9.27510900  | 3.18373500  | -8.80754000 |
| H                                                                                           | 9.98854300  | 3.10183600  | -5.18284700 |
| H                                                                                           | 11.66479400 | 2.95993600  | -5.67341400 |
| H                                                                                           | 10.14224000 | 5.05315500  | -7.22691700 |
| H                                                                                           | 11.30840800 | 3.88992400  | -7.27256300 |
| O                                                                                           | 7.60567200  | 4.31207300  | -6.38577800 |
| C                                                                                           | 7.92649400  | 3.41786500  | -7.23494800 |
| O                                                                                           | 6.99106800  | 2.73018400  | -7.78577200 |
| C                                                                                           | 7.29981300  | 1.87403600  | -2.44665100 |
| C                                                                                           | 7.61903200  | 2.78314800  | -1.42887700 |
| C                                                                                           | 6.37216000  | 2.36365000  | -3.36572600 |
| C                                                                                           | 7.13785400  | 4.08712000  | -1.35792500 |
| C                                                                                           | 5.86381700  | 3.66274500  | -3.33911600 |
| C                                                                                           | 6.25252400  | 4.53504200  | -2.33325500 |
| F                                                                                           | 5.01449400  | 4.08761100  | -4.29799900 |
| F                                                                                           | 5.92058700  | 1.60093400  | -4.39148600 |
| F                                                                                           | 5.81158600  | 5.80774600  | -2.32615900 |
| F                                                                                           | 7.52286900  | 4.91591200  | -0.37494000 |
| F                                                                                           | 8.44759900  | 2.42011200  | -0.45405900 |
| O                                                                                           | 9.02778000  | 5.99433500  | -5.23822700 |
| H                                                                                           | 10.26511000 | 6.48548100  | -3.65881900 |
| H                                                                                           | 9.41724300  | 4.92829900  | -3.49401800 |
| C                                                                                           | 8.05739500  | 6.96326800  | -4.78948200 |
| H                                                                                           | 7.41794400  | 7.18031900  | -5.65631300 |
| H                                                                                           | 7.45047500  | 6.58008800  | -3.97161000 |
| H                                                                                           | 8.57596800  | 7.87594100  | -4.48814500 |
| H                                                                                           | 8.34244600  | 4.93279600  | -5.92698400 |
| <b>C. Optimized structures in toluene</b>                                                   |             |             |             |
| <b>CL in toluene</b>                                                                        |             |             |             |
| C                                                                                           | 0.00002300  | 0.00471000  | -0.00073300 |
| C                                                                                           | 0.00164400  | -0.00008600 | 1.52647000  |
| H                                                                                           | 1.02021000  | 0.00084500  | -0.40548800 |
| H                                                                                           | -0.50862200 | -0.88496000 | -0.38018100 |
| C                                                                                           | 0.90551400  | 2.72236500  | 0.26592000  |
| C                                                                                           | 0.99872800  | 0.97257200  | 2.16853100  |
| H                                                                                           | -1.02077000 | 0.20484700  | 1.87110700  |
| H                                                                                           | 0.24190100  | -1.02122800 | 1.85095800  |
| C                                                                                           | 0.80386200  | 2.44340300  | -1.78232300 |
| C                                                                                           | 1.76375000  | 2.18086100  | -0.15619800 |
| H                                                                                           | 1.07513000  | 3.78708400  | 0.05095900  |
| H                                                                                           | -2.01818000 | 0.66698500  | 1.89031900  |
| H                                                                                           | 0.93741800  | 0.87894600  | 3.26010700  |
| H                                                                                           | -0.16347100 | 2.80945700  | 2.15219500  |
| H                                                                                           | 1.57204100  | 3.04290600  | 2.28523300  |
| O                                                                                           | -0.75667100 | 1.08865300  | -0.58241700 |
| C                                                                                           | -0.36583700 | 2.38227500  | -0.50753600 |
| O                                                                                           | -1.04223100 | 3.22169400  | -1.05021400 |
| <b>A<sup>-</sup> = [MeB(C<sub>6</sub>F<sub>5</sub>)<sub>2</sub>]<sup>-</sup> in toluene</b> |             |             |             |
| B                                                                                           | -0.03031200 | 0.06803900  | -0.02351500 |
| C                                                                                           | -0.03846200 | 0.03736500  | 1.65154400  |
| C                                                                                           | 1.08021900  | -0.01034500 | 2.48938300  |
| C                                                                                           | -1.25170700 | -0.02101600 | 2.34789800  |
| H                                                                                           | 1.01771000  | -0.05038300 | 3.88155900  |
| H                                                                                           | -1.36516200 | -0.06341500 | 3.73557700  |
| C                                                                                           | -0.21664300 | -0.07293500 | 4.51528300  |
| C                                                                                           | 1.44792300  | 0.49024500  | -0.66462300 |
| C                                                                                           | 2.07241700  | -0.12515800 | -1.75123200 |
| C                                                                                           | 2.09941600  | 1.65487400  | -0.24166300 |
| C                                                                                           | 3.24514100  | 0.33788400  | -2.34984400 |
| C                                                                                           | 3.26860300  | 2.15626100  | -0.80257700 |
| C                                                                                           | 3.85318500  | 1.48879300  | -1.87232900 |
| C                                                                                           | -0.47184700 | -1.48324100 | -0.43863300 |
| C                                                                                           | -1.63953300 | -1.85603500 | -1.10547000 |
| C                                                                                           | 0.31996200  | -2.56797800 | -0.04580700 |
| C                                                                                           | -2.00183700 | -3.18039200 | -1.35936600 |
| C                                                                                           | 0.00343500  | -3.90163400 | -0.27543500 |
| C                                                                                           | -1.17686300 | -4.21355300 | -0.94103600 |
| F                                                                                           | -0.29979100 | -0.11444900 | 5.85750100  |
| F                                                                                           | 2.14536300  | -0.08088700 | 4.61940300  |
| F                                                                                           | 2.33911100  | -0.03212600 | 1.98295700  |
| F                                                                                           | -2.57547600 | -0.10820600 | 4.32756700  |
| F                                                                                           | -2.40387100 | -0.06694400 | 1.68017800  |
| F                                                                                           | 1.55270000  | -1.23956700 | -2.32237200 |
| F                                                                                           | 3.78682100  | -0.31954700 | -3.39480400 |
| F                                                                                           | 4.98245700  | 1.95502600  | -2.43686600 |
| F                                                                                           | 3.83822800  | 3.28141800  | -0.32637600 |
| F                                                                                           | 1.95903700  | 2.37938900  | 0.78752600  |
| F                                                                                           | 1.49301000  | -2.34284200 | 0.59339400  |
| F                                                                                           | 0.82272400  | -4.89161800 | 0.13113100  |
| F                                                                                           | -1.51104400 | -5.49560800 | -1.17590000 |
| F                                                                                           | -3.14855500 | -3.46502300 | -2.00868600 |
| F                                                                                           | -2.51618100 | -0.93399000 | -1.56682500 |
| F                                                                                           | -1.04172300 | 1.24053600  | -0.58296800 |
| H                                                                                           | -1.04163500 | 1.28551800  | -1.68095900 |
| H                                                                                           | -2.08317200 | 1.13395900  | -0.26967300 |
| H                                                                                           | -0.70135200 | 2.22438300  | -0.23133500 |
| <b>A<sup>-</sup> = [B(C<sub>6</sub>F<sub>5</sub>)<sub>2</sub>]<sup>-</sup> in toluene</b>   |             |             |             |
| B                                                                                           | 2.35510000  | -4.33901800 | 0.66098100  |
| C                                                                                           | 2.49691100  | -4.25383300 | 2.31520100  |
| C                                                                                           | 3.48315300  | -5.00183400 | 2.96717100  |
| C                                                                                           | 1.81451000  | -3.37141100 | 3.155227400 |
| C                                                                                           | 3.75752800  | -4.92715000 | 4.32777300  |
| C                                                                                           | 2.05569900  | -3.26016700 | 4.52512300  |
| C                                                                                           | 3.03357400  | -4.04357400 | 5.11981100  |
| C                                                                                           | 3.73527400  | -3.54697900 | 1.07935200  |
| C                                                                                           | 4.90784900  | -4.14401400 | -0.28788500 |
| C                                                                                           | 3.84785600  | -2.16685600 | 0.37932300  |
| C                                                                                           | 6.07792400  | -3.43935700 | -0.57323600 |
| C                                                                                           | 4.99020300  | -1.42276500 | 0.10880700  |
| C                                                                                           | 6.12206800  | -2.06695100 | -0.37683300 |
| C                                                                                           | 2.22965500  | -5.89127600 | 0.07981200  |
| C                                                                                           | -2.36553400 | -6.13245800 | -1.29134700 |
| C                                                                                           | 1.83212400  | -7.01254500 | 0.81125400  |
| C                                                                                           | 2.17176500  | -7.36905800 | -1.89573500 |
| C                                                                                           | 1.62508000  | -8.27274700 | 0.24907900  |
| C                                                                                           | 1.79813400  | -8.45659100 | -1.11489400 |
| F                                                                                           | 3.28131300  | -3.94644600 | 6.43741900  |
| F                                                                                           | 4.71837100  | -5.69044900 | 4.88222900  |
| F                                                                                           | 4.24695600  | -5.86664700 | 2.25897100  |
| F                                                                                           | 1.35213900  | -2.38987300 | 5.27412700  |
| F                                                                                           | 0.85785000  | -2.54373600 | 2.67979800  |
| F                                                                                           | 4.98469100  | -5.47760200 | -0.49173600 |
| F                                                                                           | 7.16873600  | -4.08258600 | -1.03130700 |
| F                                                                                           | 7.24129700  | -1.37204200 | -0.64378700 |
| F                                                                                           | 5.01482000  | -0.09248300 | 0.31635800  |
| F                                                                                           | 2.79525800  | -1.47204500 | 0.86943900  |
| F                                                                                           | 1.60685800  | -6.94095700 | 2.14189800  |
| F                                                                                           | 1.24974000  | -9.31121800 | 1.02002800  |
| F                                                                                           | 1.60223700  | -9.66308200 | -1.67429600 |
| F                                                                                           | 2.33485600  | -7.52351700 | -3.22347900 |
| F                                                                                           | 2.70135000  | -5.11740700 | -2.12097200 |
| F                                                                                           | 0.95370400  | -3.66476900 | 0.07251400  |
| F                                                                                           | -0.27966000 | -4.07486800 | 0.59008000  |
| C                                                                                           | 0.84520000  | -2.80843700 | -1.02493600 |
| C                                                                                           | -1.51449200 | -3.65459700 | 0.11017200  |
| C                                                                                           | -0.37072100 | -2.35798900 | -1.54050700 |
| C                                                                                           | -1.56213000 | -2.78297900 | -0.97148700 |
| F                                                                                           | -0.39701400 | -1.52166000 | -2.59565500 |
| F                                                                                           | 1.93916900  | -2.35439300 | -1.67569900 |
| F                                                                                           | -0.31530700 | -4.94224700 | 1.62833500  |
| F                                                                                           | -2.65887200 | -4.08787300 | 0.67220100  |
| F                                                                                           | -2.74237500 | -2.36302700 | -1.45912000 |
| <b>Cp<sub>2</sub>ZrMe<sup>+</sup> in toluene</b>                                            |             |             |             |
| C                                                                                           | 0.14012000  | 0.04888000  | -0.24688500 |
| C                                                                                           | -0.15447200 | 0.14366800  | 1.13642300  |
| C                                                                                           | 1.55744400  | -0.00742100 | -0.40068100 |
| C                                                                                           | 2.13663700  | 0.04569800  | 0.88870500  |
| C                                                                                           | 3.19478600  | 0.04529300  | 1.11458000  |
| H                                                                                           | 1.07979700  | 0.11650300  | 1.84296500  |
| H                                                                                           | 1.10713000  | -4.14271900 | 2.40547000  |
| C                                                                                           | 2.04211500  | -3.14477900 | 2.79762100  |
| H                                                                                           | 1.51711100  | -4.64600300 | 1.14461800  |
| C                                                                                           | 3.05130600  | -3.06539300 | 1.79448300  |
| C                                                                                           | 2.72724900  | -3.99018100 | 0.77467400  |
| Zr                                                                                          | 0.83644500  | -2.18565900 | 0.78293200  |
| C                                                                                           | -1.30671500 | -2.64609300 | 1.33359000  |
| H                                                                                           | -1.57546200 | -2.45648100 | 2.38125100  |
| H                                                                                           | -1.99057000 | -2.05565500 | 0.70851200  |
| H                                                                                           | -0.49840200 | -3.71266200 | 1.14131000  |
| H                                                                                           | 2.09438500  | -0.05204200 | -1.34130700 |
| H                                                                                           | -0.58937900 | 0.05293600  | -1.04931000 |
| H                                                                                           | -1.13902300 | 0.22399500  | 1.57675300  |
| H                                                                                           | 0.24787400  | -4.47206500 | 2.97273500  |
| H                                                                                           | 1.02149900  | -5.42584900 | 0.57764000  |
| H                                                                                           | 3.30067900  | -4.16680500 | -0.12901600 |
| H                                                                                           | 3.91784000  | -2.41682700 | 1.81636500  |
| H                                                                                           | 2.03091900  | -2.59490000 | 3.73058600  |
| H                                                                                           | 1.19810100  | 0.19686300  | 2.91690100  |
| <b>C<sup>+</sup>-Complex in toluene</b>                                                     |             |             |             |
| C                                                                                           | 2.42583800  | 2.61998800  | 0.35744700  |
| C                                                                                           | 3.83791000  | 2.74047600  | 0.31909400  |
| C                                                                                           | 1.98458400  | 2.17919200  | -0.92167200 |
| C                                                                                           | 3.12364300  | 2.00991800  | -1.74387900 |
| C                                                                                           | 3.12175900  | 1.69385700  | -2.77935300 |
| C                                                                                           | 4.27536400  | 2.34865000  | -0.97279900 |
| C                                                                                           | 5.12978600  | -1.61195100 | 0.06047800  |
| C                                                                                           | 5.09540500  | -1.04813700 | -1.24266300 |
| C                                                                                           | 3.89876600  | -2.28196600 | 0.27927100  |
| C                                                                                           | 3.84096900  | -1.37992500 | -1.83301200 |
| C                                                                                           | 3.10979500  | -2.15013100 | -0.89519400 |
| C                                                                                           | 4.25875700  | 0.39322000  | 2.16716800  |
| H                                                                                           | 5.31161200  | 0.70444000  | 2.17758000  |
| C                                                                                           | 3.69590400  | 1.13055100  | 2.75671500  |
| C                                                                                           | 4.19698500  | -0.57274400 | 2.68631700  |
| C                                                                                           | 0.95774900  | 2.00118700  | -1.21676600 |

|   |             |             |              |    |              |             |             |    |              |             |              |   |              |             |              |
|---|-------------|-------------|--------------|----|--------------|-------------|-------------|----|--------------|-------------|--------------|---|--------------|-------------|--------------|
| H | -0.85634600 | -2.91396100 | -3.23578700  | C  | -9.70200500  | -1.92142000 | -4.27029200 | C  | 0.34073200   | 0.22314400  | 0.42799000   | H | -10.92832300 | 2.76889200  | -11.08365700 |
| C | 3.60160900  | -2.71607700 | -5.34541000  | C  | -11.09949000 | -1.77544500 | -4.07071700 | C  | 1.05243400   | 0.48247400  | 1.74293500   | O | -9.21134700  | 2.95979800  | -8.20003100  |
| H | 1.44290800  | -4.10982900 | -5.58085000  | C  | -9.47921800  | -3.17098200 | -4.90076500 | H  | 1.01666800   | -0.06806700 | -0.38069400  | H | -8.78564700  | 3.41288800  | -7.03507100  |
| C | 0.74841800  | -2.08317400 | -5.14835000  | C  | -11.74164900 | -2.94485800 | -4.55661200 | H  | -0.44562300  | -0.52435500 | 0.52466700   | O | -9.63953800  | 4.55323300  | -6.49072800  |
| H | -0.50867700 | -3.24930500 | -5.51137800  | H  | -11.59317600 | -0.91869500 | -3.62883700 | H  | 1.59658500   | 2.72727900  | -0.37081000  | O | -7.81743300  | 2.94388800  | -6.44525100  |
| C | 2.89871100  | -4.03232700 | -5.08920400  | H  | -8.51645700  | -3.57971400 | -5.18083300 | C  | 2.34805500   | 1.29586700  | 1.62583500   | C | -9.16611600  | 5.18926700  | -5.17483800  |
| H | 4.63330300  | -2.71556900 | -4.98740300  | C  | -10.74294700 | -3.80662700 | -5.07621500 | H  | 0.34767800   | 0.94876500  | 2.44356600   | H | -9.74317000  | 5.30732600  | -7.28222000  |
| C | 3.06474700  | -1.86378700 | -4.93129700  | H  | -12.80513000 | -3.14188200 | -4.53572800 | H  | 1.28603000   | -0.50673700 | 2.15643400   | H | -10.64749000 | 4.13491400  | -6.36232400  |
| H | 1.43375800  | -3.98472700 | -6.67163700  | H  | -10.90782800 | -4.78679600 | -5.50609400 | C  | 2.17604500   | 2.71305900  | 1.06736400   | C | -8.12236800  | 6.31527400  | -5.30629100  |
| H | 1.08619200  | -5.13138200 | -5.39610400  | C  | -9.18013200  | -2.89330000 | -8.33748200 | H  | 2.09914000   | 2.03483600  | -1.01216200  | C | -8.79978100  | 4.40019900  | -4.50808400  |
| C | 3.48099900  | -4.84467000 | -5.54144000  | C  | -10.44701300 | -3.53185500 | -8.46836000 | H  | 1.75478000   | 3.75861700  | -0.81236700  | H | -10.04567900 | 5.62218600  | -4.68171100  |
| H | 2.95054600  | -4.18118400 | -4.00427900  | C  | -9.31805100  | -1.55773900 | -8.79166800 | H  | 3.05880000   | 0.74582800  | 0.99394800   | C | -6.70801200  | 9.91754100  | -5.76321700  |
| C | 2.01528300  | -1.86104300 | -2.88207800  | H  | -8.26904000  | -3.35252300 | -7.97502100 | H  | 2.80787300   | 1.36699100  | 2.61760800   | H | -8.03865600  | 6.81953300  | -4.33545800  |
| O | 1.09887700  | -2.59174700 | -2.51204900  | C  | -11.36036000 | -2.58992000 | -9.00275900 | H  | 1.55067900   | 3.19456000  | 1.73426700   | H | -8.50897700  | 7.06935900  | -6.00611500  |
| O | 0.82959300  | -2.83419800 | -1.24829000  | H  | -10.66530000 | -4.56531100 | -8.22963600 | H  | 3.15331600   | 3.20426700  | 1.02591000   | C | -9.56440000  | 4.98597900  | -4.81812000  |
| H | -0.99457400 | -0.15783500 | -0.81602500  | C  | -10.66489100 | -1.36597100 | -9.19133500 | O  | -0.42927400  | 1.40427200  | -0.04946000  | H | -6.11358900  | 6.82979100  | -5.90583700  |
| H | -1.38974700 | -0.22174400 | 1.84577800   | H  | -8.53728200  | -0.80759600 | -8.80356000 | C  | 0.12873700   | 2.50349300  | -0.41877500  | H | -6.74289800  | 5.41119800  | -6.73484500  |
| H | 0.61504700  | -4.55660400 | 2.92970300   | H  | -12.40353900 | -2.76878400 | -9.22630000 | O  | -0.62544200  | 3.44471800  | -0.84552000  | H | -4.96648800  | 4.74835300  | -5.16999100  |
| H | 1.50557600  | -5.39192100 | -0.59491100  | H  | -10.40559000 | -2.76878400 | -9.22630000 | H  | -14.48238300 | 2.00094900  | -3.32451800  | H | -6.50084800  | 4.05402100  | -5.45594300  |
| H | 3.57657100  | -3.82670200 | -1.18624000  | H  | -11.09219300 | -0.44399400 | -9.56530000 | C  | -14.33627600 | 1.84926200  | -4.40290300  | O | -5.80848400  | 4.67590100  | -3.53864300  |
| H | 3.95965200  | -2.01376300 | 1.83088700   | H  | -11.09219300 | -0.44399400 | -9.56530000 | Zr | -12.19251100 | 1.14339000  | -4.79717900  | C | -5.29821300  | 5.96571600  | -2.52476500  |
| H | 2.12056900  | -2.45894100 | 3.75493700   | H  | -15.13448900 | 1.18168800  | -4.75386200 | H  | -15.13448900 | 1.18168800  | -4.75386200  | H | -5.17873400  | 5.81063700  | -1.26866100  |
| H | 1.00028500  | 0.06986400  | 3.04792400   | C  | -0.48362300  | 1.36864300  | -2.63374700 | H  | -14.47860500 | 2.82111000  | -4.89652500  | O | -4.96283800  | 3.79655000  | -2.62229900  |
| C | 5.33607400  | 0.64530500  | -6.98803700  | C  | -0.36834100  | -0.00732800 | -1.99100800 | H  | -11.32484800 | 2.83914600  | -4.00077600  | H | -5.26227500  | 5.03090000  | 0.06007400   |
| C | 4.38751800  | 1.57910900  | -7.72933500  | O  | 0.47540300   | 1.73833800  | -3.01087900 | C  | -10.40174100 | 3.37675700  | -3.22201700  | H | -4.23264900  | 6.36891700  | -1.33263800  |
| H | 6.20758400  | 0.35988800  | -7.57909000  | H  | -1.19863300  | 1.36031800  | -3.45725800 | O  | -10.86232700 | 4.67331600  | -2.56208200  | H | -5.96701800  | 6.56910000  | -1.30746800  |
| H | 5.66961100  | 1.08270200  | -0.604396100 | O  | 0.92943400   | 2.27242000  | -0.26236600 | O  | -9.30278500  | 2.86969300  | -3.03116700  | C | -2.38422900  | 3.39914900  | -1.12485600  |
| C | 4.23103300  | -1.37773500 | -8.82702700  | C  | 0.84104600   | -0.18650600 | -1.06345600 | C  | -9.77733100  | 5.48313100  | -1.83730400  | C | -3.96874600  | 4.43565500  | 0.64991900   |
| C | 4.02924900  | 1.18366200  | -0.81200400  | H  | -1.30639000  | -0.22648400 | -1.14607500 | H  | -11.37643100 | 5.28074900  | -3.31751700  | H | -6.01902300  | 4.24343000  | -0.02867700  |
| H | 3.46236000  | 1.68093900  | -7.14732700  | O  | -0.29887700  | -0.73308400 | -2.81126300 | H  | -11.64607500 | 4.37610000  | -1.85060300  | H | -5.64749000  | 3.77319400  | 0.80731500   |
| H | 4.86728700  | 2.56581800  | -7.71678100  | C  | 0.89247300   | 0.77505400  | 0.12949800  | C  | -8.91454000  | 6.47146800  | -2.71963500  | C | -3.40240500  | 5.16665900  | -0.02166300  |
| C | 3.40518300  | -0.17549400 | -9.35513300  | H  | 1.63482900   | 2.42756900  | -1.08691900 | H  | -9.09585100  | 4.79027400  | -1.33028100  | H | -2.68813700  | 4.15605700  | -1.84146400  |
| C | 5.27698300  | -1.28444500 | -1.91074000  | H  | 1.26576400   | 2.87938900  | 0.58015000  | H  | -10.23699800 | 6.06885700  | -1.04734700  | H | -2.21177800  | 2.48039000  | -1.65026500  |
| H | 3.84112500  | -2.31876900 | -9.21853500  | H  | 1.76071600   | -0.06687400 | -1.65339500 | H  | -8.08556300  | 5.86694600  | -3.80668000  | H | -3.19433800  | 5.21419700  | 0.69830500   |
| H | 5.03153500  | 1.18525900  | -9.75162300  | H  | 0.84831400   | -1.21620300 | 0.68747000  | H  | -8.37544500  | 7.10469400  | -2.06851000  | H | -4.19253900  | 4.18001700  | 1.69271400   |
| H | 3.45693300  | 1.95460700  | -9.63170600  | H  | 0.04511900   | 0.59872700  | 0.80483300  | H  | -9.70755200  | 7.14648600  | -3.20840000  | H | -4.21183500  | 2.58925000  | -0.48044000  |
| H | 2.41785600  | -0.17730500 | -8.87720400  | H  | 1.79838800   | 0.57138800  | 0.71060500  | H  | -6.91398100  | 5.04921200  | -3.28547400  | H | -2.94568000  | 2.51374900  | 0.73361600   |
| C | 3.23621800  | -0.36104500 | -10.42057200 | O  | -1.05192200  | 2.38035800  | -1.73698600 | H  | -7.69589500  | 6.67707600  | -4.43715400  | H | -8.65528500  | 0.43755600  | -6.48859000  |
| O | 4.95670500  | -0.60140600 | -6.527188400 | C  | -0.42186600  | 2.80915400  | -0.65685000 | H  | -8.66311400  | 5.21006400  | -4.46840700  | C | -9.01472800  | -0.05461150 | -7.38282600  |
| C | 4.21287400  | -1.48405500 | -7.33899500  | O  | -0.98901100  | 3.65866400  | 0.04632400  | H  | -6.32633100  | 4.62630700  | -4.10646400  | H | -10.35049000 | -0.05328800 | -7.86154500  |
| C | 3.67497900  | -2.52770400 | -6.83184300  | H  | -13.31229600 | 2.19557500  | -5.44638100 | O  | -6.04979200  | 5.94051400  | -2.52084000  | C | -8.21398200  | 4.07472900  | -8.32509100  |
|   |             |             |              | H  | -12.44729100 | 1.59433300  | -5.75910700 | O  | -4.96755300  | 5.39544700  | -1.95532300  | H | -11.19843500 | 0.41677700  | -8.78222000  |
|   |             |             |              | Zr | -11.41628400 | 0.72849300  | -3.90581400 | C  | -3.78580600  | 4.22849800  | -2.64441000  | H | -7.14931800  | -0.92650600 | -8.24463300  |
|   |             |             |              | H  | -12.80860000 | 0.83548300  | -6.48546400 | C  | -4.15033500  | 4.62750500  | -1.19939900  | H | -9.06100200  | -1.18883200 | -9.38308500  |
|   |             |             |              | H  | -11.75397000 | 2.26153500  | -6.28976800 | O  | -4.68615700  | 4.21092700  | -2.04994100  | H | -11.25845400 | -0.94695200 | -9.69758200  |
|   |             |             |              | O  | -11.09554400 | 2.56577300  | -3.01131500 | C  | -3.18778100  | 6.09791400  | 0.29570300   | H | -8.76251200  | -1.77030300 | -10.24450000 |
|   |             |             |              | C  | -10.32131200 | 3.44201000  | -2.39961500 | C  | -1.87781600  | 6.53581100  | -1.71756000  | C | -6.58617200  | 1.73136300  | -10.39950100 |
|   |             |             |              | H  | -10.87235600 | 4.86476500  | -2.45811300 | C  | -0.62647300  | 7.38933200  | -1.28052200  | C | -6.92264100  | 0.83632700  | -10.46088100 |
|   |             |             |              | C  | -9.29642700  | 3.13913900  | -1.79766800 | C  | -2.11842000  | 3.29319500  | -0.94494600  | C | -7.37391100  | 2.74531600  | -10.45686900 |
|   |             |             |              | O  | -9.91947900  | 5.97281100  | -1.98554200 | C  | -2.69778900  | 5.23176200  | 0.67782600   | C | -6.92264100  | 0.83632700  | -10.45686900 |
|   |             |             |              | H  | -11.23638000 | 5.05419500  | -3.47577600 | H  | -4.82541100  | 5.65423900  | 0.71938600   | H | -5.83875900  | 0.83705000  | -9.82689700  |
|   |             |             |              | H  | -11.77298000 | 4.85348200  | -1.82838100 | H  | -3.78580400  | 7.05919400  | 0.80684000   | H | -8.20483800  | 1.87296500  | -11.95522300 |
|   |             |             |              | C  | -8.99155700  | 6.54906800  | -3.07170300 | C  | -2.37471500  | 3.72179200  | 0.35613500   | H | -7.33347900  | -0.17899700 | -11.83414000 |
|   |             |             |              | H  | -9.33767300  | 5.60048300  | -1.13430900 | H  | -2.76660300  | 3.93649300  | -1.178365500 | C | -7.93118000  | 3.04798000  | -11.20025600 |
|   |             |             |              | H  | -10.52428700 | 6.80432500  | -1.60322000 | H  | -2.32367900  | 2.25456600  | -1.20262100  | H | -6.51012100  | 3.42066100  | -9.51983000  |
|   |             |             |              | H  | -7.96741800  | 5.58571900  | -3.69539400 | H  | -1.78927100  | 5.66541300  | 0.23684900   | H | -8.92276400  | 1.78754900  | -11.27597000 |
|   |             |             |              | H  | -8.45518500  | 7.41011100  | -2.65287000 | H  | -2.57387200  | 5.33358000  | 1.76264500   | H | -8.41752200  | 4.00780400  | -11.32495100 |
|   |             |             |              | H  | -9.61295900  | 6.94846800  | -3.88473700 | H  | -3.81843800  | 3.39952800  | 0.28322600   | C | 3.55144200   | -2.18883200 | 0.21709700   |
|   |             |             |              | C  | -6.90582400  | 5.05406800  | -2.74848800 | H  | -2.33355200  | 3.13773100  | 1.17323500   | C | 3.50259800   | -1.49037900 | 0.07735300   |
|   |             |             |              | H  | -7.46915600  | 6.08455300  | -4.53682800 | H  | -10.02578200 | 0.46758000  | -2.54389700  | O | 2.28067800   | -2.06587600 | 0.01490800   |
|   |             |             |              | O  | -8.47364000  | 4.70819500  | -4.11599900 | C  | -10.91572800 | -0.04170500 | -2.88973300  | C | 4.74235800   | -2.35874600 | -0.00094900  |
|   |             |             |              | H  | -6.22599600  | 4.36274600  | -3.25365400 | C  | -12.23429000 | 1.16435100  | -2.40826200  | C | 2.10025300   | -3.49415100 | -1.89929000  |
|   |             |             |              | H  | -7.33594200  | 4.55136900  | -1.88135500 | C  | -10.93281000 | -0.95868600 | -3.96900200  | C | 4.89568600   | -3.32938800 | 1.19318000   |
|   |             |             |              | H  | -10.25762000 | 6.19735500  | -2.27573000 | C  | -11.31808100 | -0.64378300 | -3.17214     |   |              |             |              |

|   |             |            |             |   |             |            |            |    |             |            |            |    |            |             |             |
|---|-------------|------------|-------------|---|-------------|------------|------------|----|-------------|------------|------------|----|------------|-------------|-------------|
| O | -6.8077880  | 3.8245040  | -7.6606780  | C | -3.6148730  | 10.6897770 | 2.3768020  | O  | 3.6211920   | -1.5687030 | -0.6494550 | H  | 5.1150430  | -1.2438120  | -10.2843090 |
| C | -7.6088510  | 6.4011980  | -6.5835450  | H | -5.6569450  | 9.9588240  | 2.6237000  | H  | 5.6891650   | -1.9588210 | 1.7818480  | H  | 3.9464710  | -0.3349520  | -11.2325840 |
| H | -7.6165890  | 6.6648040  | -8.7554120  | C | -5.2641390  | 11.4055130 | 3.5339930  | H  | 7.8699600   | -0.8279940 | 0.6790200  | H  | 2.1770410  | -2.0046840  | -10.7451230 |
| H | -9.0465960  | 5.8914020  | -8.1327860  | C | -3.1715010  | 9.8197710  | 1.1872580  | H  | 6.1232360   | 1.2633270  | -3.4468570 | H  | 3.5929700  | -2.7561140  | -11.4623640 |
| C | -6.2385610  | 7.0861940  | -6.4160040  | H | -3.2213260  | 10.2375780 | 3.2959170  | H  | 3.8057090   | -0.0965110 | -3.6185130 | O  | 2.6974310  | -1.8002750  | -7.4953380  |
| H | -7.2072460  | 5.5509740  | -5.8980360  | H | -3.1241440  | 11.6694040 | 2.2883090  | H  | 2.1336500   | 0.8602780  | -1.7462070 | C  | 2.4409480  | -2.9195290  | -8.2063900  |
| C | -4.9865230  | 6.2008400  | -6.5481260  | C | -3.6241040  | 8.3684100  | 1.2544550  | H  | 3.4029680   | 2.8246200  | -0.4171360 | O  | 1.4942690  | -3.6021020  | -7.8576510  |
| H | -6.1263120  | 7.1269400  | -6.2760030  | H | -2.7054200  | 9.8443930  | 1.1213760  | H  | 5.8867700   | 3.0537350  | -1.4427210 | H  | 8.0556360  | -2.2746510  | -5.0610220  |
| C | -4.8725150  | 7.5688610  | -5.4310410  | H | -3.5513660  | 10.2291970 | 0.2440130  | H  | 7.4699530   | 1.8309380  | 0.5846180  | C  | 7.8979660  | -1.2513240  | -6.3399970  |
| H | -6.1625150  | 7.8989260  | -7.1519180  | H | -3.2914910  | 7.8093840  | 0.3727710  | H  | -2.3959880  | 0.8406480  | 0.1822190  | H  | 8.4507220  | -0.3229070  | -6.1473960  |
| C | -4.8513240  | 5.1244890  | -5.6118200  | H | -4.7090390  | 8.2796850  | 1.1784000  | C  | -3.2739180  | -0.3294470 | 0.9413360  | H  | 8.3167320  | -1.6779260  | -7.2610110  |
| H | -0.0962180  | 6.8421510  | -6.4517150  | O | -3.0199860  | 7.7639590  | 2.4324950  | H  | -3.4533900  | -0.1381070 | 2.0031610  | H  | 6.8659040  | -0.9612450  | -6.5604530  |
| H | -4.9736990  | 5.6872100  | -7.5158500  | C | -3.4841080  | 6.5585120  | 2.8076420  | H  | -4.2590780  | -0.4172620 | 0.4630380  | C  | 9.6930500  | -2.5115190  | -4.9156610  |
| H | -3.9445700  | 4.5279680  | -5.6257370  | C | -2.8550080  | 6.1241340  | 4.1209180  | H  | -3.0178410  | -1.3208880 | 0.8688740  | C  | 10.3808810 | -3.6827170  | -5.2410390  |
| H | -5.7031200  | 4.4435460  | -5.4746380  | O | -4.3219620  | 5.9330210  | 2.1861760  | C  | -3.2757980  | 2.2577630  | 0.1573730  | O  | 10.5400590 | -1.4416690  | -4.6013940  |
| O | -4.7578140  | 5.7889080  | -4.1875730  | C | -3.0439950  | 6.4607210  | 4.4671500  | C  | -3.5185590  | 3.0734050  | -0.9514980 | C  | 11.7713840 | -3.8041120  | -5.2335300  |
| C | -4.6751910  | 5.0051140  | -3.1056490  | H | -1.7977110  | 6.4141450  | 4.1251050  | C  | -3.8169520  | 2.7613560  | 1.3456270  | C  | 11.9283270 | -1.5122650  | -4.5777120  |
| C | -4.5627500  | 5.8381860  | -1.8389310  | C | -3.3308220  | 6.7443170  | 4.8939860  | C  | -4.2783210  | 4.2409420  | -0.9150180 | C  | 12.5559880 | -2.7111470  | -4.8970170  |
| O | -4.6730630  | 3.7868700  | -3.1481240  | H | -1.2774270  | 4.3421390  | 1.4485180  | C  | -4.5766770  | 3.9258880  | 1.4346250  | C  | 7.2288610  | -0.3710750  | -5.2234820  |
| C | -4.9710650  | 5.1174670  | -0.5400420  | C | -2.0622120  | 3.6406560  | 3.8264260  | C  | -4.8177350  | 4.6731380  | 0.2894350  | C  | 7.2267780  | -4.6368690  | -4.1741070  |
| H | -3.5282260  | 6.2070110  | -1.7349700  | H | -0.4724810  | 4.3520460  | 4.2196300  | C  | -2.1026160  | 0.1996490  | -1.3293650 | C  | 6.4154630  | -0.0774520  | -6.2943890  |
| H | -5.1772600  | 6.7328200  | -1.9843580  | C | -2.9463900  | 4.5415540  | 5.5553170  | O  | -0.9004370  | -0.3624530 | -1.7563810 | C  | 6.4800780  | -5.8096410  | -4.1571330  |
| C | -2.3117760  | 2.9535540  | -1.3465540  | C | -2.1661440  | 3.4386700  | 2.2985070  | C  | -3.1483250  | 0.0015090  | -2.2420310 | C  | 5.6420460  | -5.2383390  | -6.5226870  |
| C | -3.9000170  | 4.3011070  | 0.2127920   | H | -1.4232810  | 5.4023600  | 1.6609800  | C  | -0.1766450  | -1.0176610 | -2.9723920 | C  | 5.6944120  | -6.1123440  | -5.2460430  |
| H | -5.8383680  | 4.4768760  | -0.7417420  | H | -1.4489120  | 4.1669810  | 0.3841460  | C  | -3.0178410  | -0.6412480 | -3.4692440 | C  | 7.3418320  | -11.7448800 | -3.7135110  |
| H | -5.3196760  | 5.8920440  | 0.1538460   | H | -1.0320410  | 3.9181020  | 4.0904800  | C  | -1.7631300  | -1.1601690 | -3.8458080 | C  | 5.9964680  | -1.1890150  | -3.7660080  |
| C | -3.4972060  | 2.9344860  | -0.3842850  | H | -2.2422880  | 2.6711020  | 4.3089440  | C  | -0.9663370  | 1.2360600  | 0.9464270  | C  | 7.9338010  | -1.3445450  | -2.4666260  |
| H | -2.4463120  | 3.6718300  | -2.1517580  | H | -3.1995810  | 3.5955980  | 1.9692340  | C  | -0.3839200  | 0.5287110  | 1.9992530  | C  | 5.3078910  | -0.5745460  | -2.7240000  |
| H | -2.1256490  | 1.9654010  | -1.7673080  | H | -1.9127220  | 2.4024160  | 2.0437030  | C  | -0.2244530  | 2.3564440  | 0.5483400  | C  | 7.2917840  | -0.1718200  | -1.3973780  |
| H | -3.0047390  | 4.9206600  | 0.3649210   | H | -8.5722140  | 9.4585740  | -0.7611490 | C  | -0.1335990  | 0.8888430  | 2.6158790  | C  | 5.9710930  | -0.3176440  | -1.5327500  |
| H | -4.3008680  | 4.1142050  | 1.1267950   | C | -9.1915990  | 10.1130470 | -1.3601980 | C  | 0.9858990   | 2.7696990  | 1.1533260  | C  | 13.8959590 | -2.8060930  | -4.8850400  |
| H | -4.3387340  | 2.5068160  | -0.9387890  | C | -9.9237030  | 11.2339610 | -0.8910140 | C  | 1.4922380   | 2.0215860  | 2.1936100  | C  | 12.6688820 | -0.4359760  | -4.2534330  |
| H | -3.2592740  | 2.2320620  | 0.4245000   | C | -9.3418650  | 10.0533870 | -2.7633580 | F  | -5.5454570  | 5.8003320  | 0.3489230  | F  | 10.0155360 | -0.2332120  | -4.2821740  |
| H | -7.6385410  | 1.5520180  | -8.1744890  | C | -10.5491330 | 11.8550940 | -2.0057120 | F  | -5.0682800  | 4.3374370  | 2.6182980  | F  | 9.7213490  | -4.8006770  | -5.6103380  |
| C | -8.2074580  | 1.2284230  | -9.0361990  | H | -9.9914080  | 11.5625900 | 1.1388600  | F  | -12.3565200 | 2.1282590  | 2.5244910  | F  | 12.3565200 | -4.9724900  | -5.1556680  |
| C | -9.5445210  | 1.5987060  | -9.3358580  | H | -8.9092100  | 9.3063190  | -3.4219370 | F  | -2.9920620  | 2.7768030  | -2.1616940 | C  | 6.3104280  | -3.2997330  | -7.4037900  |
| C | -7.7180440  | 0.4569500  | -1.1193660  | C | -10.1891370 | 11.1284740 | -3.1680740 | F  | -4.4791690  | 4.9654780  | -2.0318980 | F  | 4.8272350  | -5.4969060  | -7.3691030  |
| C | -9.8935770  | 1.0333250  | -10.5907460 | H | -11.1851100 | 12.7294840 | -1.9723590 | F  | -4.3900500  | 0.4470720  | -1.9526100 | F  | 4.8994450  | -2.7149540  | -5.2408940  |
| H | -10.1866640 | 2.2120660  | -8.8761210  | H | -10.5136350 | 11.3421100 | -4.1789550 | F  | -0.4276270  | -0.7786570 | -4.2899720 | F  | 6.5178110  | -6.6444730  | -3.1017010  |
| C | -6.7324170  | 0.0155240  | -10.1903760 | C | -6.8241100  | 11.5287490 | -4.5072860 | F  | -1.6319890  | -1.7949890 | -5.0187270 | F  | 7.9906640  | -4.4086830  | -3.0816140  |
| C | -8.7627120  | 0.3341570  | -11.0823190 | C | -7.6075030  | 12.6776140 | -4.8177330 | F  | 4.0924260   | -1.5374580 | -3.2924630 | F  | 5.2465790  | -1.4359800  | -4.8751630  |
| H | -10.8493520 | 1.1259480  | -11.0876250 | C | -5.7845050  | 11.9317880 | -3.6320420 | F  | 0.2204670   | -0.3338010 | -0.9676490 | F  | 4.0037130  | -0.2423330  | -2.8500200  |
| H | -8.7141200  | -0.2229370 | -12.0098700 | H | -6.9832880  | 10.5272950 | -4.8866300 | F  | 0.9363630   | -0.6172100 | 2.4694420  | F  | 5.3265330  | -2.7698900  | -5.0228810  |
| C | -5.8320260  | 2.2529880  | -12.1886330 | C | -7.0473870  | 13.7856160 | -4.1326060 | F  | 1.3537140   | 0.1147850  | 3.5837850  | F  | 7.9320860  | -0.5139440  | -0.2339660  |
| C | -6.8287600  | 2.0031550  | -13.1770940 | H | -8.4640730  | 12.7038360 | -5.4798600 | F  | 2.6674820   | 2.3659370  | 2.7557420  | F  | 9.1953000  | -1.7420810  | -2.2054400  |
| C | -5.7914840  | 3.6509590  | -11.9556940 | H | -5.9272030  | 13.3230200 | -3.3931090 | F  | 1.6276480   | 3.8527260  | 0.7055540  |    |            |             |             |
| H | -5.1918530  | 1.5132260  | -11.7258790 | F | -5.0321140  | 11.2848240 | -3.1983270 | F  | -0.6226430  | 3.0945550  | -0.5094140 |    |            |             |             |
| C | -7.4083730  | 3.2449480  | -13.5368310 | H | -7.4092910  | 14.8042270 | -4.1670970 |    |             |            |            |    |            |             |             |
| H | -7.0806260  | 1.0378680  | -13.5963830 | H | -5.2996880  | 13.9244300 | -2.7471540 |    |             |            |            |    |            |             |             |
| C | -6.7736160  | 4.2617940  | -12.7735440 | O | 2.0483410   | -1.3192570 | 0.7747600  |    |             |            |            |    |            |             |             |
| H | -5.1533150  | 4.1564730  | -11.2425810 | C | 2.0338380   | -1.8885980 | -0.3716440 |    |             |            |            |    |            |             |             |
| H | -8.1960970  | 3.3944410  | -11.4262430 | O | 1.0510150   | -1.6220690 | -1.1559860 |    |             |            |            |    |            |             |             |
| H | -7.0094220  | 5.3179220  | -12.8024070 | C | 3.1455010   | -2.8434440 | -0.6796730 |    |             |            |            |    |            |             |             |
| C | 1.8287760   | -1.7336990 | 1.0885800   | O | 0.9266440   | -2.2064730 | -2.5206350 |    |             |            |            |    |            |             |             |
| C | 0.9905520   | -2.7381280 | 0.3603350   | C | 2.6517890   | -4.2910630 | -0.8844890 |    |             |            |            |    |            |             |             |
| C | 2.7376240   | -3.9023140 | 0.6667950   | H | 3.6573180   | -2.4808160 | -1.5857000 |    |             |            |            |    |            |             |             |
| C | 0.9032540   | -3.8826780 | -1.5962740  | C | 3.8534850   | -2.7766920 | -1.4932800 |    |             |            |            |    |            |             |             |
| C | 1.9740850   | -5.1928020 | 1.0557780   | H | 0.7143590   | -3.7095850 | -2.4967850 |    |             |            |            |    |            |             |             |
| C | 3.3792240   | -4.0964270 | -2.0352000  | H | 1.8155720   | -1.9008880 | -3.0786580 |    |             |            |            |    |            |             |             |
| C | 3.3824770   | -3.5760530 | 1.4850310   | H | 0.8549300   | -1.6742000 | -2.9063040 |    |             |            |            |    |            |             |             |
| C | 0.3536910   | -5.1538010 | -0.9608920  | H | 1.9727200   | -4.5419640 | -2.2374900 |    |             |            |            |    |            |             |             |
| H | 1.8891330   | -4.0330630 | -2.0487910  | H | 1.9837680   | -4.5653530 | -0.0582040 | Zr | 0.7609670   | -4.1777970 | 1.3913430  |    |            |             |             |
| H | 0.2280740   | -3.4968370 | -2.3606080  | H | 3.5345920   | -4.9319410 | -0.7967990 | C  | 3.7009830   | -2.1689800 | 1.1644550  | Zr | 0.7857570  | -0.2015720  | 0.6524980   |
| C | 1.3709660   | -5.9514680 | -1.1331800  | H | 0.0575470   | -3.9452460 | -1.7722120 | O  | 3.5247870   | -3.4485590 | 0.5837880  | C  | -1.3647370 | -2.0416420  | 1.3528880   |
| H | 1.1975210   | -4.9482510 | 1.7921610   | H | 0.3110300   | -3.9682600 | -3.4837980 | H  | -1.5805630  | -2.2326120 | 3.3858550  | H  | -1.5805630 | -2.1495690  | 2.3998920   |
| H | 2.6876840   | -5.8458140 | 1.5691790   | H | 2.7027000   | -4.3487250 | -0.0397210 | H  | -2.0420520  | -1.8041240 | 0.7260950  | H  | -1.6244340 | -3.4598670  | 1.2091210   |
| H | -0.5266660  | -4.8911530 | -0.3596610  | H | 1.7163130   | -5.6037930 | -2.3053040 | H  | 1.7766770   | -0.0123500 | -1.5997410 | H  | 1.7766770  | -0.0123500  | -1.5997410  |
| H | -0.0118490  | -5.7845740 | -1.7808820  |   |             |            |            | H  | 0.0866240   | -5.0565990 | -2.9172420 | H  | -0.5119200 | -4.8224900  | -3.2852070  |
| H | 2.1851140   | -6.2826720 | -0.7933390  |   |             |            |            | H  | -0.3160870  | -5.0979300 | -4.3981150 | H  | -1.5507040 | -3.1038150  | -2.812      |

|   |             |             |              |   |             |             |             |    |             |             |             |   |             |              |              |
|---|-------------|-------------|--------------|---|-------------|-------------|-------------|----|-------------|-------------|-------------|---|-------------|--------------|--------------|
| H | 3.19024100  | 0.80238900  | -9.02734500  | O | 5.36012600  | -1.05357500 | -5.86881300 | B  | 8.35095400  | -0.85921600 | -2.61016300 | H | 6.99525900  | -0.12818800  | -7.30936400  |
| H | 4.55366900  | 0.50843700  | -10.09403100 | C | 5.22798800  | -2.09601700 | -6.60609300 | C  | 9.94214800  | -0.38005600 | -2.61062700 | H | 6.06818500  | 1.04894100   | -6.23910500  |
| O | 4.04962600  | -0.04963200 | -6.01378100  | O | 4.60456800  | -3.09456100 | -6.10332500 | O  | 10.96131000 | -1.33211700 | -2.49314000 | C | 5.20171000  | -2.25747800  | -8.50105500  |
| C | 3.85933900  | -0.88237100 | -7.02415600  | B | 9.55509000  | -1.98110900 | -3.07828100 | O  | 10.41306500 | 0.91499600  | -2.81838400 | C | 5.44265300  | 0.12012000   | -9.59990100  |
| C | 3.02361700  | -1.78374400 | -6.87902700  | C | 9.48724300  | -0.66341100 | -4.06248500 | C  | 12.31973800 | -1.04698400 | -2.56721200 | H | 4.35943500  | 1.18072500   | -8.02407500  |
| B | 7.34810700  | -3.03396400 | -4.28574700  | H | 9.92860000  | 0.20400300  | -3.55426800 | H  | 11.76322300 | 1.25386800  | -2.91076500 | H | 5.73011600  | 2.00909400   | -8.67035500  |
| H | 8.19673500  | -1.73874400 | -5.27919600  | H | 10.06635800 | -0.81252300 | -4.98492000 | C  | 12.72878700 | 0.26625600  | -2.78045200 | C | 4.66373000  | -1.20119700  | -9.48973300  |
| H | 8.29536300  | -2.04158400 | -4.25768600  | H | 8.47552400  | -0.37142800 | -4.35607200 | C  | 8.20540000  | -1.83727300 | -3.67577800 | H | 6.29534000  | -2.33285400  | -8.57713300  |
| H | 7.28925600  | -1.15842600 | -5.46585100  | C | 11.17127200 | -2.12955500 | -2.72699100 | C  | 8.14074000  | -3.23240700 | -3.99085100 | H | 4.80292600  | -3.24446300  | -8.74928200  |
| H | 8.93236000  | -1.04987900 | -4.84286700  | C | 12.04201300 | -3.06902700 | -3.28279900 | C  | 8.33791000  | -1.27141000 | -5.24547200 | H | 6.49219800  | -0.08835800  | -9.84871700  |
| C | 9.50216400  | -3.69132600 | -4.16512700  | C | 11.82188500 | -1.16020600 | -1.95448700 | C  | 8.03485200  | -3.99457300 | -5.15523900 | H | 5.03155400  | 0.67120400   | -10.45433700 |
| C | 9.94440000  | -4.84428500 | -4.81725100  | C | 13.42196600 | -3.07928800 | -3.07543100 | C  | 8.28685100  | -1.99451800 | -6.43295100 | H | 3.61053600  | -0.99157100  | -9.25958000  |
| C | 10.52850300 | -2.99393600 | -3.51715600  | C | 13.19120400 | -1.12793200 | -1.71575200 | C  | 8.08659000  | -3.37175900 | -6.39459000 | H | 4.67009500  | -1.66972100  | -10.48065600 |
| C | 11.26590800 | -5.29273200 | -4.80861000  | C | 14.00543500 | -2.10208100 | -2.28256000 | C  | 7.91993700  | -1.64804300 | -1.21038200 | O | 5.00584300  | -0.88205800  | -6.46669600  |
| C | 11.85774500 | -3.39936200 | -3.47705800  | C | 8.93054200  | -3.37620600 | -3.74211800 | C  | 6.69437500  | -2.31446600 | -1.11796400 | C | 4.87688000  | -1.98127600  | -7.05402000  |
| C | 12.23469500 | -4.56676800 | -4.13147100  | C | 8.97419800  | -4.57306600 | -3.01570800 | C  | 8.40640900  | -1.59301000 | 0.00570200  | O | 4.43448400  | -3.03814100  | -6.40579200  |
| C | 6.85937000  | -4.13691100 | -4.82805900  | C | 8.25583600  | -3.49104100 | -4.95422400 | C  | 6.20036900  | -2.91247600 | 0.03318800  | B | 8.36015000  | -1.05134100  | -2.70054700  |
| C | 6.62266100  | -5.30846800 | -4.09967200  | C | 8.41130700  | -5.77406300 | -4.34553800 | C  | 8.14690300  | -2.16378000 | 1.19478400  | C | 9.90652700  | -0.43853200  | -2.70166500  |
| C | 6.02345300  | -3.98861100 | -5.93564200  | C | 6.76833600  | -4.67117100 | -5.42212300 | C  | 6.93196400  | -2.83350000 | 1.21165400  | O | 10.98060500 | -1.20849100  | -2.24038700  |
| C | 5.66394800  | -6.26144300 | -4.42971100  | C | 7.74591400  | -5.82389200 | -4.65457100 | F  | 14.03385700 | 0.56830400  | -2.86371100 | C | 10.29652600 | 0.78013000   | -3.25277100  |
| C | 5.05059600  | -4.91733800 | -6.30536000  | C | 8.58231600  | -1.74267400 | -1.73528200 | F  | 12.31135200 | 2.53126800  | -3.13045500 | C | 12.31296800 | -0.81299400  | -2.89939700  |
| C | 4.86121000  | -6.06059500 | -5.54317400  | C | 7.24009500  | -1.38375000 | -1.90101500 | F  | 9.56166500  | 1.96554000  | -2.96387300 | C | 11.61639200 | 1.22219300   | -3.33116900  |
| C | 7.34815600  | -2.52972900 | -2.81872300  | C | 8.94327000  | -1.92230500 | -0.39513200 | F  | 10.63658100 | -2.63004800 | -2.28722700 | C | 12.63886800 | 4.20721200   | -1.84536000  |
| C | 6.19690300  | -1.73522500 | -2.78886500  | C | 6.34304500  | -1.16184400 | -0.86046100 | F  | 13.24016300 | -0.20189600 | -2.44042900 | C | 8.43611600  | -2.32846400  | -9.87542100  |
| C | 7.82547200  | -2.85627000 | -1.54421500  | C | 8.08707300  | -1.69855300 | 0.68371300  | F  | 8.49837000  | 0.06545500  | -5.40648300 | C | 5.17396000  | -3.61984400  | -3.66435000  |
| C | 5.60716900  | -1.23680200 | -1.63112300  | C | 6.77750800  | -1.30352100 | 0.44977600  | F  | 8.30311000  | -1.36130900 | -7.62915000 | C | 8.49156500  | -1.88627700  | -5.22714400  |
| C | 7.27346400  | -2.38018600 | -0.35439100  | F | 15.33204900 | -2.09141300 | -2.07223200 | F  | 7.95483000  | -4.07401500 | -7.53280800 | C | 8.57203600  | -4.56773400  | -4.68703400  |
| C | 6.16202500  | -1.55068900 | -0.39891200  | F | 13.73645100 | -0.16338900 | -0.95182600 | F  | 8.14518200  | -5.32509700 | -5.08489100 | C | 8.53253300  | -2.79403500  | -6.28011200  |
| F | 13.51339100 | -4.97850400 | -4.11332800  | F | 11.10696800 | -0.16282300 | -1.37892400 | F  | 7.80891300  | -3.95089200 | -2.85005000 | C | 8.56725500  | -4.15580900  | -6.01352200  |
| F | 12.78157500 | -2.62744100 | -2.82108400  | F | 11.58671200 | -4.05185200 | -4.09886100 | F  | 8.18519400  | -2.41497900 | -2.20837900 | F | 7.88236400  | -1.62347000  | -1.12623100  |
| F | 10.25473300 | -1.83565100 | -2.86702700  | F | 14.19142400 | -4.02443800 | -3.64684800 | F  | 5.00807800  | -3.54969100 | 0.02079300  | C | 6.74120400  | -4.23996000  | -0.06628000  |
| F | 9.09215800  | -5.61591500 | -5.53561400  | F | 8.09607800  | -2.42059700 | -5.78832600 | F  | 6.46300800  | -3.38256100 | 2.34755500  | C | 8.39709000  | -1.20470000  | 0.01252700   |
| F | 11.60895000 | -6.41931600 | -5.46102600  | F | 7.02702400  | -4.69305500 | -6.60711400 | F  | 8.66716200  | -2.06182200 | 2.32465800  | C | 6.17375100  | -2.81006000  | 0.11112500   |
| F | 6.10340300  | -2.89928100 | -6.74272200  | F | 7.16527700  | -6.95898100 | -5.07613700 | F  | 9.78821400  | -0.94520300 | 0.11313900  | F | 7.85879400  | -1.55611000  | 1.25117000   |
| F | 4.26299900  | -4.69667000 | -7.37970700  | F | 8.49224200  | -6.87936000 | -2.67414700 | C  | 7.31333400  | 4.07709400  | -4.48823200 | C | 6.73495900  | -3.26748500  | 1.30212100   |
| F | 3.91265300  | -6.95286200 | -5.87518000  | F | 9.60354800  | -4.60111700 | -1.82146700 | F  | 8.11735200  | 5.36842100  | -4.61451100 | F | 13.91735200 | 0.82442000   | -2.91212900  |
| F | 5.49538100  | -7.36317700 | -3.67196700  | F | 6.70447900  | -1.26150800 | -3.15006700 | F  | 7.85153600  | 3.32178300  | -3.90918000 | F | 11.90300700 | 2.01703400   | -3.89165600  |
| F | 7.36566600  | -5.56956600 | -3.00086000  | F | 5.06033300  | -0.82495700 | -1.11105200 | F  | 6.36275200  | 4.26979700  | -3.98564800 | F | 9.38332700  | 1.64470400   | -3.77631300  |
| F | 5.54466600  | -1.41179600 | -3.994155400 | F | 5.93422400  | -1.08136200 | 1.48005700  | C  | 9.25413200  | 3.02399600  | -6.35478800 | F | 10.74331000 | -2.42539400  | -1.70207100  |
| F | 4.50000300  | -0.46591300 | -1.69322300  | F | 8.51328500  | -1.87179200 | 1.94581200  | C  | 9.59869300  | 5.16604100  | -4.95861900 | F | 13.28872900 | -1.60683400  | -1.81514200  |
| F | 5.60709300  | -1.08419500 | 0.74161000   | F | 10.17547100 | -2.34984900 | -0.05485600 | H  | 7.62790700  | 6.01590700  | -5.35512000 | F | 8.53231000  | -0.57894800  | -5.96197700  |
| F | 7.80033300  | -2.72231100 | 0.83354500   |   |             |             |             | H  | 8.04365400  | 5.88695100  | -3.64938400 | F | 8.52330100  | -2.35600400  | -7.56285400  |
| F | 8.87718000  | -3.68400100 | -1.38318500  |   |             |             |             | H  | 8.84802600  | 4.44899100  | -6.29078300 | F | 8.60323500  | -0.505111200 | -7.01283700  |
|   |             |             |              |   |             |             |             | H  | 9.45998100  | 2.50066900  | -5.41386400 | F | 8.62654600  | -5.88016600  | -4.40164400  |
|   |             |             |              |   |             |             |             | H  | 10.19628000 | -0.04044100 | 0.47840800  | F | 8.54416300  | -4.11925200  | -2.47122400  |
|   |             |             |              |   |             |             |             | H  | 2.91213800  | -0.90791600 | -0.49463900 | H | 10.07460300 | 4.58552500   | -4.15572600  |
|   |             |             |              |   |             |             |             | H  | 3.17692700  | -0.72060000 | 0.88499000  | H | 10.08959900 | 6.14295900   | -4.97714600  |
|   |             |             |              |   |             |             |             | H  | 4.11070700  | -0.93129700 | 1.39018700  | H | 9.46271800  | 5.04749200   | -7.12775300  |
|   |             |             |              |   |             |             |             | C  | 2.00301400  | -0.18985800 | 1.49027200  | F | 10.92999600 | 4.56234300   | -6.44560600  |
|   |             |             |              |   |             |             |             | C  | 0.63257000  | -3.73632700 | 2.94837700  | O | 8.69651700  | 3.51048700   | -5.75836300  |
|   |             |             |              |   |             |             |             | C  | 1.84781600  | -3.08504400 | 3.27613400  | F | 7.76598300  | 2.97566900   | -6.64206000  |
|   |             |             |              |   |             |             |             | C  | 0.93006100  | -4.77975500 | 2.02844000  | F | 7.30659200  | 2.48193300   | -7.65689300  |
|   |             |             |              |   |             |             |             | C  | 2.89677400  | -3.71518300 | 2.54814800  | H | 7.26565900  | 0.37526900   | -2.71156700  |
|   |             |             |              |   |             |             |             | C  | 2.32615500  | -4.77191000 | 1.79217900  | H | 6.55613600  | -0.01492800  | -2.69367600  |
|   |             |             |              |   |             |             |             | Zr | 1.41588300  | -2.58062200 | 0.75154800  | H | 8.30320400  | 3.62511600   | -4.05307100  |
|   |             |             |              |   |             |             |             | C  | -0.86484900 | -2.37331800 | 0.64093100  | H | 6.55612600  | 3.90659800   | -5.05252600  |
|   |             |             |              |   |             |             |             | H  | -1.32767900 | -1.77844900 | 1.44031700  | C | 9.50967300  | 3.35894400   | -6.64418100  |
|   |             |             |              |   |             |             |             | H  | -1.13663400 | -1.90581300 | -0.31606000 | O | 9.07771400  | 5.72543000   | -5.67464900  |
|   |             |             |              |   |             |             |             | H  | -1.31987400 | -3.37292100 | 0.66807500  | H | 6.90248800  | 5.67139800   | -5.86664000  |
|   |             |             |              |   |             |             |             | H  | 3.59070800  | -1.33236400 | -1.22246200 | H | 7.48832200  | 0.67620100   | -4.25903000  |
|   |             |             |              |   |             |             |             | C  | 1.39585400  | -5.06182300 | -2.96317000 | C | 9.48111000  | 4.88398300   | -6.89257200  |
|   |             |             |              |   |             |             |             | C  | 1.74014200  | -5.13128200 | -4.45880600 | C | 10.01175200 | 3.13522700   | -5.69168000  |
|   |             |             |              |   |             |             |             | H  | 1.95069700  | -5.81254000 | -2.38634200 | H | 10.07096000 | 2.85551300   | -7.43167500  |
|   |             |             |              |   |             |             |             | H  | 0.33518300  | -5.30601400 | -2.81049100 | C | 8.91253800  | 5.56153900   | -4.87337400  |
|   |             |             |              |   |             |             |             | C  | 4.20559200  | -3.06504200 | -4.85174100 | H | 9.13883800  | 6.78852300   | -5.94132400  |
|   |             |             |              |   |             |             |             | C  | 3.21022600  | -5.45746800 | -4.78640800 | H | 8.82095900  | 5.10126300   | -4.87313300  |
|   |             |             |              |   |             |             |             | H  | 1.43777200  | -4.19002500 | -4.93218300 | H | 10.49028800 | 5.17612300   | -7.20388600  |
|   |             |             |              |   |             |             |             | H  | 1.12691600  | -5.91614500 | -4.91873800 | O | 7.22358100  | 3.05446300   | -5.74453800  |
|   |             |             |              |   |             |             |             | C  | 4.27791900  | -4.46968100 | -4.28719700 | C | 8.14709800  | 2.71239900   | -            |

|   |            |            |            |   |            |            |            |    |            |            |            |   |            |            |            |
|---|------------|------------|------------|---|------------|------------|------------|----|------------|------------|------------|---|------------|------------|------------|
| H | 3.3730900  | -6.0694900 | -4.0669110 | H | -0.9646180 | -3.2218950 | 2.9378120  | C  | 8.3077000  | 4.2473050  | -0.9883130 | C | 6.3964750  | -0.5144370 | 0.8325150  |
| H | 4.5915330  | -4.0187330 | -3.8113260 | H | -1.1654870 | -3.1300200 | 1.1791300  | C  | 8.4303370  | 4.8230950  | 0.4197840  | F | 14.2225430 | 0.8744280  | -3.1579580 |
| C | 3.2846740  | -3.9482830 | -2.6519980 | H | -0.7054030 | -4.6655710 | 1.9433240  | H  | 8.5367330  | 3.1775530  | -1.0060100 | F | 12.6701260 | 1.4582310  | -5.3481440 |
| O | 5.0170200  | -3.3235420 | -2.3005210 | H | 2.9111580  | -1.1360830 | -0.5667550 | H  | 7.2942010  | 4.3839760  | -1.3715000 | F | 10.0692800 | 0.9589490  | -5.3395500 |
| C | 0.7702210  | -4.4395190 | -1.8695900 | C | 1.4545630  | -5.2350430 | -2.3024620 | C  | 11.8370400 | 4.0757740  | -0.8874850 | F | 10.4586160 | -0.7589640 | -0.8949500 |
| O | 0.9037300  | -4.7301530 | -0.8803840 | C | 1.7233600  | -5.1545690 | -3.8134410 | C  | 6.6645710  | 4.3396140  | 1.1915980  | F | 13.0458950 | -0.2407610 | -0.9481600 |
| H | -0.8367190 | -1.9400680 | -0.3221800 | H | 2.1322720  | -5.9427420 | -1.8102100 | H  | 8.4121190  | 5.9194770  | 0.3516110  | F | 7.2252910  | -0.7364800 | -6.0018220 |
| H | -1.4447080 | -1.9873970 | 2.3112030  | H | 0.4413630  | -5.6247060 | -2.1246700 | H  | 7.5276000  | 4.5289210  | 0.9712850  | F | 7.4549190  | -2.9531720 | -7.4319490 |
| H | 0.5375090  | -6.0116000 | 3.9170350  | C | 3.7757620  | -2.6774350 | -4.2528840 | C  | 11.0043010 | 4.6769610  | 0.5248760  | F | 8.6868800  | -5.1718300 | -6.4095780 |
| H | 6.4352000  | -7.2323740 | 1.6355790  | C | 3.2117030  | -5.1958800 | -4.2114290 | H  | 7.5276000  | 4.5289210  | 0.9712850  | F | 9.2726440  | -5.0851200 | -3.8746070 |
| H | 3.4124910  | -5.9248880 | 0.6478860  | H | 1.2423270  | -4.2516000 | -4.2059490 | H  | 12.2397310 | 4.0817890  | -1.1665580 | F | 9.5536900  | -2.8520220 | -2.4180280 |
| H | 3.9785500  | -3.8811290 | 2.2979970  | H | 1.2273030  | -6.0049870 | -4.2987950 | H  | 9.9202600  | 3.2504030  | 1.3192630  | F | 6.5059100  | -2.4495590 | -2.2013810 |
| H | 2.2058800  | -3.9387470 | 4.3319230  | C | 4.0926250  | -4.0517040 | -3.6831330 | H  | 9.6492940  | 4.7730460  | 2.1997910  | F | 5.2748160  | -2.4774680 | 0.1141260  |
| H | 8.0544100  | -1.7627810 | 3.6902590  | H | 4.3011610  | -1.8968580 | -3.6970980 | H  | 11.1436540 | 5.7658380  | 0.4771510  | F | 5.7572250  | -0.5378280 | 2.0199330  |
| C | 6.5998400  | 3.1274000  | -7.2478250 | H | 2.7095780  | -2.4499220 | -4.2278590 | H  | 11.8158260 | 4.2897040  | 1.1520700  | F | 7.5308560  | 1.4872870  | 1.4227480  |
| C | 5.6043720  | 2.2786190  | -8.0109640 | H | 3.2806910  | -5.2168390 | -5.3073120 | O  | 9.1243150  | 4.9329320  | -1.9735990 | F | 8.7918220  | 1.5329630  | -0.9135560 |
| H | 6.4079030  | 3.1411440  | -6.1724060 | H | 3.6380230  | -6.1469440 | -3.8623930 | O  | 10.4725700 | 4.8372200  | -1.9904740 | C | 9.7030960  | 4.4242020  | -5.0158910 |
| H | 6.6613870  | 4.1504520  | -7.6257060 | H | 5.1459890  | -4.2764530 | -3.8910060 | C  | 10.0454700 | -1.5669450 | 2.5897090  | C | 10.7026710 | 5.3002680  | -5.7046390 |
| C | 4.0670330  | -1.3108490 | -7.6254490 | H | 4.0144950  | -3.9782730 | -2.5915510 | H  | 8.7820710  | 3.3460950  | -5.0240280 | H | 9.7820710  | 3.3460950  | -5.0240280 |
| C | 5.4469860  | 0.8468010  | -7.4809960 | O | 1.3780820  | -2.8234290 | -2.1146250 | C  | 8.8525410  | -0.9455240 | 2.0605060  | C | 8.8525410  | -0.9455240 | -4.5093940 |
| C | 6.4452060  | 2.8089030  | -7.9315700 | C | 1.5096330  | -3.9031850 | -1.5558770 | C  | 9.9981430  | 3.0185270  | -7.9782490 | C | 9.9981430  | 3.0185270  | -7.9782490 |
| C | 8.1761840  | 2.2763530  | -9.0759300 | O | 1.6685390  | -4.0507720 | -0.2449310 | C  | 11.6567460 | 4.5797500  | -6.6704140 | C | 11.6567460 | 4.5797500  | -6.6704140 |
| C | 4.3197290  | 0.0883580  | -8.1961110 | H | 0.2498160  | -1.0535580 | -0.4277550 | C  | 10.1560530 | 6.1051500  | -6.2106720 | C | 10.1560530 | 6.1051500  | -6.2106720 |
| H | 4.9832060  | -1.9119210 | -7.6065000 | H | -0.4511700 | -0.6814880 | 2.1563420  | C  | 11.2885950 | 5.7883980  | -4.9178850 | C | 11.2885950 | 5.7883980  | -4.9178850 |
| H | 3.3609200  | -1.8579800 | -8.2655220 | H | 0.8422300  | -4.8156630 | 4.2372440  | C  | 12.0642000 | 4.4325240  | 0.0605060  | C | 12.0642000 | 4.4325240  | 0.0605060  |
| H | 5.2282760  | 0.8858470  | -6.4070100 | H | 1.6870510  | -6.2826650 | 2.1425060  | C  | 10.2988090 | 2.2539800  | -7.2702110 | C | 10.2988090 | 2.2539800  | -7.2702110 |
| H | 6.3933770  | 0.3036970  | -7.5954470 | H | 4.0243700  | -5.2569670 | 1.2962740  | H  | 9.9096930  | 2.5427140  | -8.9578670 | C | 9.9096930  | 2.5427140  | -8.9578670 |
| H | 3.3911480  | 0.6673740  | -8.1249570 | H | 4.6258350  | -3.1516090 | 2.8475940  | C  | 12.0988160 | 3.7134300  | -6.1631340 | C | 12.0988160 | 3.7134300  | -6.1631340 |
| H | 4.5583960  | -0.0056300 | -8.2697700 | H | 2.6544660  | -2.8740760 | 4.6753850  | C  | 12.4864200 | 5.2640730  | -6.8856240 | C | 12.4864200 | 5.2640730  | -6.8856240 |
| O | 2.9346710  | -0.3199600 | -5.7160620 | H | 1.8099970  | -0.5640320 | 3.6114410  | C  | 10.6611440 | 5.0075350  | -8.5539780 | C | 10.6611440 | 5.0075350  | -8.5539780 |
| C | 3.4692510  | -1.2862300 | -6.2265280 | C | 6.2509380  | 3.2735970  | -7.4461340 | C  | 11.8963680 | 3.7588170  | -8.6321520 | C | 11.8963680 | 3.7588170  | -8.6321520 |
| C | 8.0592880  | -2.4815990 | -5.6294520 | C | 5.3823600  | 2.2704180  | -8.1777690 | C  | 8.3917340  | 4.2231680  | -6.9562510 | C | 8.3917340  | 4.2231680  | -6.9562510 |
| B | 3.8669300  | -0.2131720 | -2.7920110 | H | 6.2031320  | 3.1614700  | -6.3612020 | Zr | 6.8293670  | 5.3383400  | -7.5774460 | C | 6.8293670  | 5.3383400  | -7.5774460 |
| C | 7.0503990  | 1.0284950  | -3.1632600 | H | 6.0301600  | 4.3086360  | -7.1946000 | O  | 6.6707160  | 3.1061370  | -8.3919030 | C | 6.6707160  | 3.1061370  | -8.3919030 |
| H | 0.7213170  | 1.8052060  | -2.3850950 | C | 4.5741980  | -1.5363820 | -7.7087640 | H  | -0.5369900 | -4.4984120 | 3.3695920  | C | 8.0946760  | 4.6567100  | -8.2761360 |
| H | 7.2491730  | 1.5253330  | -4.1152420 | H | 5.5441470  | 0.8291110  | -7.6784870 | H  | -0.4089500 | -4.1676020 | 1.7042730  | C | 8.4451600  | 5.8324830  | 0.0343260  |
| C | 1.0149440  | 0.6637170  | -3.2059460 | H | 4.3462710  | 2.5989390  | -8.0181020 | H  | -1.0949110 | -5.6227390 | 2.0737710  | C | 8.1153080  | 3.7065710  | -0.3734100 |
| C | 9.6718620  | 0.2180560  | -2.6619000 | H | 5.5703640  | 2.3469390  | -9.2567910 | H  | 1.9075660  | -0.9321780 | -0.1496450 | H | 7.0340890  | 4.8066160  | -1.2510650 |
| C | 10.1118800 | -0.6526050 | -2.0945440 | C | 4.5800500  | -0.1501120 | -8.3636820 | C  | 1.3620030  | -4.8941590 | -2.3713760 | C | 10.8952410 | 4.0667120  | -2.0524980 |
| C | 10.2461430 | 1.3546460  | -3.2258140 | H | 5.5843190  | -1.9584800 | -7.6551870 | C  | 1.5821440  | -4.6508930 | -8.3274710 | C | 9.7031520  | 5.5823200  | 0.8762790  |
| C | 11.9829520 | -0.4220230 | -2.0595730 | H | 3.9823290  | -2.2414550 | -8.3087330 | H  | 1.9415520  | -5.7557200 | -2.0163850 | H | 8.5517540  | 6.7399270  | -0.5751580 |
| C | 11.6139640 | 1.6214980  | -3.2350380 | H | 5.3564000  | 0.8161490  | -6.5985200 | C  | 3.0098000  | -5.1531870 | -2.1825840 | H | 7.5957380  | 6.0090250  | 0.7067940  |
| C | 12.4973370 | 0.7318830  | -2.6431540 | H | 6.5774300  | 0.4898700  | -7.8206590 | C  | 3.9200370  | -2.4234990 | -4.2937520 | C | 10.9765660 | 5.3076550  | 0.0668710  |
| C | 8.1231420  | -1.3597090 | -0.4070950 | H | 3.5624400  | 0.2568870  | -8.3300710 | C  | 3.0282960  | -4.8460260 | -3.6698980 | H | 10.4375740 | 3.2251470  | -0.3184670 |
| C | 8.0984790  | -2.7491760 | -3.8407700 | H | 4.8486980  | -0.2573380 | -4.9277950 | H  | 1.2083430  | -3.6474900 | -1.1671790 | H | 11.8950050 | 7.3562300  | -1.1617390 |
| C | 8.3128740  | -0.9740000 | -5.3363100 | O | 3.3044910  | -0.5968800 | -5.8646310 | H  | 0.9472940  | -5.3547680 | -4.4261630 | H | 9.5163760  | 4.7288700  | 1.5432430  |
| C | 8.1933400  | -3.6661900 | -4.8878000 | C | 3.9692820  | -1.5127930 | -6.3126600 | C  | 4.0873630  | -3.8650930 | -3.8370600 | H | 9.8763210  | 6.4500300  | 1.5239480  |
| C | 8.4528780  | -1.8465430 | -6.4144200 | O | 4.2473510  | -2.6350380 | -5.6314090 | H  | 6.4236980  | -1.7701460 | -3.7723720 | H | 11.2475300 | 6.1874140  | -0.5322490 |
| C | 8.3481200  | -3.2154150 | -6.1929280 | B | 8.4234310  | -0.3578940 | -3.1264830 | H  | 2.9124130  | -2.0446880 | -4.1178140 | H | 11.8075460 | 5.1400790  | 0.7608700  |
| C | 7.4271400  | -0.7819000 | -1.3681420 | C | 6.2651280  | 0.7050330  | -3.6195120 | C  | 3.0266700  | -4.7927240 | -5.4664850 | O | 8.8370300  | 6.6184710  | -2.1088570 |
| C | 6.2159860  | -1.4805630 | -1.3685560 | H | 7.2684420  | 1.6154660  | -3.0014670 | H  | 3.3468000  | -5.8678240 | -4.1175240 | O | 10.1224770 | 4.3094670  | -2.1252480 |
| C | 7.8752870  | -0.4475910 | -0.0889620 | H | 7.3417070  | 1.0247780  | -4.6591130 | H  | 8.0029390  | -4.2093720 | -4.1452590 | O | 10.6969020 | 4.2590250  | -3.2230650 |
| C | 5.5117570  | -1.8482720 | -0.2253760 | C | 6.2679730  | 0.2586970  | -3.4972750 | H  | 4.0955350  | -3.8572530 | -2.7415110 |   |            |            |            |
| C | 7.2117700  | -0.7912980 | 1.0898580  | C | 9.9849280  | 0.2148550  | -3.2586880 | O  | 1.8195460  | -2.5679200 | -1.8807190 |   |            |            |            |
| C | 6.0203320  | -1.4988060 | 1.0209350  | H | 11.0503990 | -0.4084780 | -2.5956950 | C  | 1.6625330  | -3.7058940 | -1.4622150 |   |            |            |            |
| F | 13.8171080 | 0.9734460  | -2.6416710 | C | 10.3948470 | 1.2375050  | -1.1123440 | C  | 1.7130570  | -4.0346790 | -0.1772760 |   |            |            |            |
| F | 12.0879890 | 2.7377520  | -3.8442050 | C | 12.3879880 | -0.0496700 | -2.7329470 | H  | -0.5949600 | -1.6418490 | 0.4656020  |   |            |            |            |
| F | 9.8557200  | 2.3005120  | -3.8539300 | C | 11.7206170 | 1.6292950  | -4.2898470 | H  | -0.7794900 | -1.8480410 | 3.1475800  |   |            |            |            |
| O | 10.1967580 | -1.8117400 | -1.5411520 | C | 12.7336810 | 0.9844880  | -3.5964310 | H  | 1.7194600  | -5.7662530 | 4.0992620  |   |            |            |            |
| O | 12.8178540 | -1.3034210 | -1.4848980 | C | 8.4564320  | -1.7373090 | -4.0689100 | H  | 2.6569200  | -6.5387430 | 1.6974710  |   |            |            |            |
| F | 8.4376940  | 0.3428860  | -5.6668800 | C | 8.6619660  | -3.0382450 | -3.5939120 | H  | 4.5195890  | -4.7590920 | 0.9208790  |   |            |            |            |
| F | 8.5751830  | -1.3656450 | -7.6670120 | C | 8.4341790  | -1.6726740 | -5.4613930 | H  | 4.7218780  | -2.8766550 | 2.8177500  |   |            |            |            |
| F | 8.4410040  | -0.4823930 | -7.2130900 | C | 8.6952120  | -4.1739940 | -4.4018300 | C  | 2.9858590  | -3.4980460 | 4.7979630  |   |            |            |            |
| F | 8.1140250  | -4.9871130 | -4.6456200 | C | 8.3499200  | -2.7788670 | -6.3068090 | H  | 1.6271890  | -1.2478010 | 4.1901200  |   |            |            |            |
| F | 7.9776490  | -3.3006300 | -2.6150820 | C | 8.5263320  | -4.0484830 | -5.7750380 | C  | 6.2676640  | 3.4940190  | -8.0984550 |   |            |            |            |
| F | 5.6395780  | -1.8302060 | -2.5451430 | C | 7.9760070  | -0.6538470 | -1.5519980 | C  | 5.3561270  | 2.4569800  | -8.7007650 |   | </         |            |            |

|   |             |             |             |   |             |             |             |   |             |              |              |   |             |              |              |
|---|-------------|-------------|-------------|---|-------------|-------------|-------------|---|-------------|--------------|--------------|---|-------------|--------------|--------------|
| H | 4.65636200  | 2.45904500  | -8.88468100 | H | 6.27160500  | 0.86589900  | 2.49144900  | H | 2.49689900  | -4.61041500  | -6.21157900  | H | 0.70014600  | -3.44503000  | -4.94629200  |
| H | 6.12508800  | 1.99566400  | -9.73835400 | H | 4.08333100  | 1.06314500  | -2.56707900 | H | 2.21900100  | -6.00711000  | -5.17124300  | H | -0.05296900 | -5.02009100  | -5.00321400  |
| C | 4.80037500  | -0.25813600 | -8.64664000 | C | 3.52074900  | 3.30221000  | 1.38708200  | C | 4.46143100  | -4.64562300  | -4.94736800  | C | 3.40495300  | -4.56747400  | -4.67425400  |
| H | 5.74741200  | -2.01622000 | -7.76712400 | C | 3.58040700  | 4.69537400  | 0.73181600  | H | 3.69197600  | -5.20710300  | -3.47819800  | H | 4.30754900  | -2.58095200  | -4.13218500  |
| H | 4.18242000  | -2.33604200 | -8.48450600 | H | 2.83213800  | 3.29240000  | 2.23446900  | H | 2.76881800  | -2.93467300  | -2.56548900  | H | 2.71371600  | -2.44117600  | -0.53079800  |
| H | 5.33935000  | 0.96714700  | -6.89534400 | H | 4.49794100  | 3.00576100  | 1.77547800  | H | 1.62585700  | -3.47753000  | -2.27223100  | H | 2.05467200  | -4.93893700  | -6.31752100  |
| H | 6.72070600  | 0.41336600  | -7.88505100 | C | 1.30233400  | 3.46174900  | -0.76320100 | H | 1.17769700  | -3.24850800  | -1.12097600  | H | 2.06318700  | -6.19217200  | -5.08513600  |
| H | 3.18164900  | 0.13891900  | -8.73769700 | C | 2.21900000  | 5.40604700  | 0.66303400  | H | -0.25543900 | -0.19371000  | -1.00630200  | H | 4.24724100  | -4.92268300  | -5.27629600  |
| H | 5.15972500  | -0.44875400 | -9.66688000 | H | 4.01189500  | 4.59851600  | -0.27311100 | H | -0.75081100 | 0.07278500   | 1.62495900   | H | 3.59441600  | -4.94453800  | -3.66282800  |
| O | 3.37412100  | -0.56092600 | -6.17738500 | H | 4.28773100  | 5.30644600  | 1.30174400  | H | 0.34168500  | -4.10216300  | 3.43363100   | O | 2.51102700  | -2.82787300  | -2.82355100  |
| C | 4.06557400  | -1.49334200 | -6.54243200 | C | 1.04880400  | 4.46118600  | 0.35087300  | H | 1.07943300  | -5.56275800  | 1.30039100   | C | 1.57422000  | -3.49122900  | -2.32759600  |
| O | 4.30863400  | -2.57940900 | -5.78834200 | H | 0.37975100  | 2.97856900  | -1.08180800 | H | 3.94743800  | -4.65609300  | 0.45597200   | O | 1.23926900  | -3.34807000  | -1.08866500  |
| B | 8.58794700  | -0.22165000 | -3.17805000 | H | 1.77716300  | 3.91700300  | -1.63659100 | H | 4.20254200  | -2.61996800  | 2.04592300   | H | -0.29175100 | -0.31941800  | -1.07357200  |
| C | 7.65230500  | 0.99033000  | -3.78794200 | H | -2.27093900 | 6.19800400  | -0.09368000 | H | 2.26734000  | -2.27402200  | 3.89587300   | H | -0.76099200 | -0.00570200  | 1.55806700   |
| H | 7.63291900  | 1.87392800  | -3.13511000 | H | 2.01351200  | 5.90234000  | 1.61884500  | H | 1.61248600  | 0.08831200   | 2.91736700   | H | 4.02395800  | -4.14050700  | 3.42606600   |
| H | 8.06992600  | 1.33599000  | -4.78347500 | H | 0.17984900  | 5.04852200  | 0.02804500  | C | 5.85794300  | 0.14407800   | -6.19304800  | H | 1.20405200  | -5.61891000  | 1.31870900   |
| H | 6.61110800  | 0.64555200  | -3.86273300 | H | 0.71700100  | 3.93361700  | 1.25039500  | C | 5.92296900  | 1.08805700   | -7.39086000  | H | 3.56926900  | -4.66047900  | 0.45733000   |
| C | 10.12241490 | 0.09708700  | -3.13962400 | C | 2.15228300  | 2.29164800  | -0.43274500 | H | 6.78786900  | -0.41322000  | -6.05790300  | H | 4.23973200  | -2.57455500  | 2.00963400   |
| C | 11.21766800 | -0.87535100 | -0.69218000 | C | 3.09738800  | 2.19350300  | 0.45606800  | H | 5.66676700  | 0.70462800   | -5.27651500  | H | 2.29597200  | -2.25200500  | 3.85505800   |
| C | 10.84633000 | 1.27494800  | -3.54539000 | C | 3.67747200  | 1.08279700  | 0.51972400  | C | 5.77249500  | -1.95146800  | -8.17695500  | H | 1.61521300  | 0.07589400   | 2.82140900   |
| C | 12.12325200 | -0.71949000 | -2.66670200 | O | 6.17344900  | 2.35313200  | -1.43761500 | C | 6.54029900  | 0.47795900   | -8.65617000  | C | 6.03568100  | 0.21725200   | -5.97169400  |
| C | 12.23325200 | 1.48912400  | -3.52637800 | H | 8.14440400  | 0.56519800  | -1.06254300 | H | 4.91027100  | 1.46358300   | -7.59159100  | C | 5.64819000  | 1.17089700   | -0.79203500  |
| C | 12.05763000 | 0.48152000  | -3.08825200 | H | 6.86027200  | -1.97549200 | 2.39912600  | H | 6.52428100  | 1.95555700   | -7.09011100  | H | 7.05215500  | -0.16681600  | -6.07814800  |
| C | 8.44210300  | -1.57923000 | -4.13691400 | H | 4.45908000  | -1.02138800 | 1.34195100  | C | 5.83046900  | -0.77736700  | -9.18026300  | H | 5.95187500  | 0.69519800   | -4.99600500  |
| C | 8.25139700  | -2.89272000 | -3.69418400 | H | 2.64132100  | -1.78040100 | 1.63159900  | H | 5.45743700  | -2.08360400  | -7.68844800  | C | 5.86460000  | -0.34807600  | -8.01888600  |
| C | 8.51777000  | -1.47374000 | -5.53053600 | H | 3.90140400  | -3.15589100 | -0.58525500 | H | 5.54574400  | -2.88256800  | -8.70123800  | C | 6.03963800  | 0.70048200   | -8.89695900  |
| C | 8.06899800  | -3.98629300 | -4.53800800 | H | 6.52069500  | -3.30541300 | -0.80079700 | H | 7.29337300  | 0.23450500   | -8.45865200  | H | 4.56635300  | 1.36358800   | -7.03039000  |
| C | 8.34051000  | -2.53684800 | -6.41220600 | H | 7.28031700  | -1.82525700 | -1.95735700 | H | 6.54809000  | 1.23766300   | -9.44823600  | H | 6.14453900  | 2.12584800   | -6.88280600  |
| C | 8.10398500  | -3.81025200 | -5.91440400 | H | -1.91388100 | -1.21159900 | 0.07791400  | H | 6.58105900  | -0.53014200  | -9.50570700  | C | 5.44943400  | -0.65269000  | -8.91774400  |
| C | 7.98255400  | -0.41111200 | -1.63556500 | C | -2.22421400 | -2.74305900 | 0.62549500  | H | 6.36031400  | -1.13122400  | -10.07252600 | H | 6.93680300  | -1.79123500  | -7.79302100  |
| C | 6.74956900  | -1.03029100 | -1.39873700 | C | -2.35809000 | -3.12737500 | 1.96037000  | O | 4.74510200  | -0.78531700  | -6.24349400  | H | 5.68429100  | -2.78965800  | -8.52708500  |
| C | 8.50656600  | 0.20356600  | -0.49769100 | C | -2.54297100 | -3.75033700 | -0.29112600 | C | 4.69322000  | -1.80991100  | -7.12066100  | H | 7.13543800  | 0.64228600   | -8.55883600  |
| C | 8.12252800  | -1.09141100 | -0.15953200 | C | -2.74481100 | -4.40659800 | 2.36230800  | O | 3.47123900  | -2.57269000  | -7.03726400  | H | 5.73214600  | 1.04210400   | -9.22678400  |
| C | 7.91142600  | 0.18996800  | 0.76391000  | C | -2.93018600 | -5.03772400 | 0.06113200  | H | 9.47110100  | -2.03606800  | -3.05448500  | H | 4.35333100  | -0.59472700  | -8.96189600  |
| C | 6.70666700  | -0.47498100 | -0.93985100 | C | -3.03189900 | -5.37193100 | 1.40746800  | C | 11.10570100 | -2.06254600  | -2.77782100  | H | 5.78649000  | -0.88726000  | -9.93431000  |
| F | 14.39817800 | 0.66980100  | -3.05672300 | F | -1.26367100 | -0.20185400 | 1.23109200  | C | 12.01022400 | -2.98249500  | -3.31293600  | O | 5.12541200  | -0.91953700  | -5.84616700  |
| F | 12.73831100 | 2.68535900  | -3.88836000 | C | -0.10080800 | -0.58843000 | 1.90341500  | H | 11.71356300 | -1.00577700  | -2.09195800  | C | 5.10186600  | -1.91087200  | -6.71988700  |
| F | 10.11455000 | 2.35376600  | -3.96256200 | F | -1.64716500 | 1.11711900  | 1.48484000  | C | 13.39276900 | -2.89706400  | -3.14578100  | O | 4.38822800  | -2.89291600  | -6.46101000  |
| F | 10.66720400 | -2.05596000 | -2.22876000 | C | 0.64179500  | 0.23451600  | 2.74147400  | C | 13.08411500 | -0.87956900  | -1.89785100  | B | 9.54606100  | -1.99977500  | -3.09354300  |
| F | 13.30756200 | -1.70550700 | -2.22432900 | C | -0.94415200 | 1.97549000  | 2.33139700  | C | 13.93717300 | -1.83987800  | -2.43060000  | C | 11.16205200 | -2.10008000  | -2.73400100  |
| F | 8.77812500  | -0.28278700 | -6.12702400 | C | 0.21628100  | 1.53994400  | 2.95310400  | C | 8.86364000  | -3.48884800  | -3.59072000  | C | 12.03822000 | -3.10342200  | -3.15292900  |
| F | 8.36277300  | -2.33127200 | -7.74465700 | C | -0.72382700 | -1.14101000 | -1.08786200 | C | 9.12827000  | -4.65650500  | -2.86514700  | C | 11.79400200 | -1.02802700  | -2.09472700  |
| F | 7.91072100  | -4.84624100 | -6.74484100 | C | 0.50170800  | 0.05665300  | -1.77547400 | C | 7.96712800  | -3.67838300  | -6.64219600  | C | 13.41488500 | -3.07334800  | -2.62350000  |
| F | 7.83034900  | -5.20918100 | -4.02848000 | C | 0.23086300  | -2.12632000 | -1.35517600 | C | 8.60214000  | -5.90827100  | -3.16658200  | C | 13.15932000 | -0.95397900  | -1.84644600  |
| F | 8.21462000  | -3.18646100 | -2.37534600 | C | 0.53741800  | 0.27297100  | -2.67135000 | C | 7.41849500  | -4.91235200  | -4.98689400  | C | 13.98305500 | -2.19924600  | -2.62732600  |
| F | 6.07166900  | -1.60604400 | -2.41597600 | C | 1.29015800  | -1.95415200 | -2.24816900 | C | 7.72969000  | -6.40021000  | -4.24711500  | C | 8.88013900  | -3.43539500  | -3.59725900  |
| F | 4.94310900  | -1.72884100 | -0.01875800 | C | 1.44520000  | -0.74870100 | -2.91500400 | C | 8.54363900  | -1.77820500  | -1.69673600  | C | 9.02035800  | -4.57614200  | -2.79752500  |
| F | 6.10356000  | -0.50548200 | -2.14487800 | F | -3.40486800 | -6.60753900 | 1.77546700  | C | 7.17721200  | -1.51517700  | -1.83700100  | C | 8.03284900  | -3.62103400  | -4.68843400  |
| F | 8.48347600  | 0.84017500  | 1.79682900  | F | -3.21217200 | -5.95615400 | -0.79863500 | C | 8.95923800  | -1.90298900  | -0.36863500  | C | 8.41501300  | -5.80075900  | -3.05888600  |
| F | 9.65650700  | 0.93977900  | -0.56295800 | F | -2.48126600 | -3.48879800 | -1.61744800 | C | 6.29615400  | -1.34173600  | -0.77812900  | C | 7.40586900  | -4.27760000  | -4.994430100 |
| C | 9.78948700  | 5.68661400  | -4.54719300 | F | -2.12016700 | -2.25819900 | 2.96769700  | C | 8.11532700  | -1.71897200  | 0.72918500   | C | 7.59133400  | -5.92916500  | -4.17209500  |
| C | 10.73796000 | 6.22443300  | -5.59882600 | F | -2.84509700 | -4.70926900 | 3.66899500  | C | 6.77610400  | -1.42440100  | 0.52233700   | C | 8.57828400  | -1.946370400 | -1.78910300  |
| C | 10.01747400 | 3.39117700  | -7.38664000 | F | -2.72203000 | 1.66845400  | 0.88737800  | F | 15.26466100 | -1.74135100  | -2.26097000  | C | 7.22907300  | -1.32626100  | -1.98781300  |
| C | 11.66413700 | 5.18754900  | -6.27054700 | F | -1.34371700 | 3.25049300  | 2.50111600  | C | 8.93901600  | 0.16009100   | -1.21188100  | C | 8.93901500  | -1.74316600  | -0.44312100  |
| C | 10.10909600 | 6.71522900  | -6.34898900 | F | 0.94636800  | 2.38815300  | 3.70520500  | C | 10.94871200 | -0.01916500  | -1.57042000  | C | 6.31414500  | -1.09932200  | -0.96720100  |
| H | 11.34210100 | 7.01073300  | -5.12914200 | F | 1.78304900  | -0.20174600 | 3.31242700  | H | 11.58955900 | -0.430407900 | -4.04957800  | C | 8.05879300  | -1.57316700  | 0.61674500   |
| H | 11.14823200 | 4.48525200  | -7.54305100 | F | 0.39572800  | -1.83547200 | 1.71405600  | C | 7.42019500  | -3.82836000  | -3.68048200  | C | 6.73875600  | -1.18518000  | 0.35257100   |
| H | 10.18341900 | 2.86880900  | -6.42651800 | F | -1.31347500 | 1.12085600  | -1.55744700 | C | 15.50208600 | -2.64375200  | -5.41591600  | C | 5.30541400  | -1.948360900 | -2.04391000  |
| H | 10.19624500 | 2.62136300  | -8.15437500 | F | 0.70640400  | 1.47277200  | -3.26247900 | F | 6.59566500  | -5.00572600  | -6.01917600  | F | 13.68941400 | 0.10812900   | -1.21463100  |
| H | 11.97135800 | 4.43065200  | -5.53789800 | F | 2.48058400  | -0.55504300 | -3.75447000 | C | 7.15304400  | -7.23239400  | -4.54774300  | H | 11.05705800 | -0.02877100  | -1.67755000  |
|   |             |             |             |   |             |             |             |   |             |              |              |   |             |              |              |

|   |             |              |             |   |             |             |              |    |             |             |             |    |             |             |             |
|---|-------------|--------------|-------------|---|-------------|-------------|--------------|----|-------------|-------------|-------------|----|-------------|-------------|-------------|
| C | 0.87541900  | -3.96643600  | -4.83248900 | H | -1.50545300 | -2.40449000 | 1.43160300   | C  | 5.16717100  | 1.90616400  | -2.65183400 | F  | 9.90331500  | -1.31149300 | 0.31402700  |
| C | 0.36099200  | -4.83159900  | -2.88745100 | H | -1.25293500 | -2.39836200 | -0.32145100  | C  | 5.36947300  | 2.78926000  | -1.60121200 | C  | 7.17127800  | 4.13685800  | -4.58808100 |
| H | -0.71478900 | -3.55513100  | -3.41801500 | H | -1.30975300 | -3.93665800 | 0.56391500   | F  | 4.10401600  | 2.06191900  | -3.46676200 | H  | 7.66558600  | 5.49410400  | -5.07268300 |
| C | 3.96164900  | -3.07153800  | -4.54171200 | H | 3.44403100  | -1.28551000 | -0.98447800  | C  | 5.75795300  | 0.05402500  | -3.90895600 | C  | 6.87914700  | 3.63839100  | -3.93281200 |
| C | 1.23252800  | -4.84279900  | -5.00061400 | C | 1.56916500  | -5.17615800 | -3.00456200  | F  | 4.51471500  | 3.79779400  | -1.37928200 | H  | 6.22568700  | 4.23728500  | -4.05560400 |
| C | 1.05254200  | -2.95384500  | -5.21277400 | C | 1.89279200  | -5.16144200 | -4.50588000  | F  | 6.69044000  | 3.44212200  | 0.24910500  | C  | 9.18171400  | 3.10002100  | -6.41060900 |
| C | 0.09085700  | -4.39909300  | -5.46255100 | C | 2.19635000  | -5.89641300 | -2.46406600  | F  | 8.39705700  | 1.43421300  | -0.19014000 | C  | 9.13298800  | 5.52651700  | -5.51857400 |
| C | 3.38246900  | -4.43043000  | -4.20294600 | H | 0.53614700  | -5.51660400 | -2.84705100  | C  | 3.38358300  | -5.32243800 | -4.86061800 | H  | 7.00104600  | 5.84399000  | -5.29412300 |
| H | 4.78924600  | -2.78871700  | -3.88914100 | C | 4.13698300  | -2.84855100 | -4.85022300  | C  | 1.48694900  | -4.24143800 | -4.94235900 | H  | 7.53269000  | 6.19045600  | -4.23475800 |
| C | 3.21272000  | -2.27605100  | -4.54467900 | C | 1.35572200  | -5.99003700 | -4.98413300  | C  | 1.35572200  | -5.99003700 | -4.98413300 | H  | 9.46818700  | 4.59318500  | -6.68744300 |
| H | 2.38923100  | -4.88604300  | -6.06749900 | H | 4.34718500  | -4.25133300 | -4.32362300  | C  | 2.88714400  | -0.91823900 | -0.52877900 | H  | 9.54716500  | 2.81966800  | -5.41631500 |
| H | 1.88366600  | -5.87241900  | -4.71083300 | H | 4.76416100  | -2.11581000 | -4.34044100  | C  | 3.29833000  | -0.74144100 | 0.83587300  | H  | 9.70047500  | 2.47127900  | -7.13679200 |
| H | 4.16575000  | -5.18766600  | -4.33343600 | H | 3.09767500  | -5.22772000 | -4.80921500  | C  | 2.88714400  | -0.91823900 | -0.52877900 | H  | 7.69552200  | 5.26513300  | -4.66174100 |
| C | 3.16186500  | -4.40638400  | -3.12864200 | H | 3.48007800  | -5.37458600 | -5.95358700  | C  | 4.18429000  | -0.97467200 | 1.29040900  | H  | 9.39644700  | 6.55398600  | -5.79764900 |
| O | 1.62185400  | -1.85057800  | -3.00691200 | H | 3.72916700  | -6.29438900 | -4.48323200  | C  | 2.09883200  | -0.18968600 | 1.50449700  | H  | 8.93149900  | 4.90422200  | -7.59371400 |
| C | 1.05349200  | -2.82553800  | -2.52557200 | H | 5.38130500  | -4.57271300 | -4.52258600  | C  | 0.61818300  | -3.69193300 | 3.00272400  | O  | 10.53620900 | 4.68025900  | -6.91567500 |
| O | 0.97667900  | -3.07674200  | -1.23326000 | H | 4.26755400  | -4.16815800 | -3.23300400  | C  | 1.86286900  | -3.09282700 | 3.31764900  | O  | 6.82252100  | 3.21974400  | -5.67528800 |
| H | 0.03478100  | 0.08365900   | -1.00229100 | H | 1.76464100  | -2.76737000 | -2.90467300  | C  | 0.86194900  | -4.74808800 | 2.08088600  | O  | 7.72424900  | 1.94262000  | -6.50552000 |
| H | -0.52489800 | 0.25242500   | -1.62970700 | O | 1.66621600  | -3.82553900 | -2.29726300  | C  | 2.87706900  | -3.76872700 | 2.58147300  | O  | 7.33502800  | 4.72528700  | -7.38787500 |
| H | 0.05632600  | -4.27797100  | -3.13655900 | C | 1.86621600  | -3.82553900 | -2.29726300  | C  | 2.25458400  | -4.79988000 | 1.83133300  | C  | 7.39642200  | 0.34693900  | -2.28703600 |
| O | 0.56837300  | -5.54995500  | 0.82230900  | C | 1.56992500  | -3.92565500 | -0.98228800  | Zr | 1.41017400  | -2.57565500 | 0.78261100  | C  | 7.55431900  | 1.26119500  | -3.12778200 |
| C | 3.05754200  | -4.88942300  | 0.03991600  | H | 0.88695700  | -0.79416500 | -1.58835900  | C  | 1.41017400  | -2.57565500 | 0.78261100  | C  | 6.27615000  | 0.59868600  | -3.07728400 |
| H | 4.05959600  | -3.19184200  | 1.85599500  | H | -0.39853700 | -0.10104100 | 0.68535900   | H  | -1.31128500 | -1.70228200 | 1.47758000  | C  | 6.71142800  | 0.23110200  | -0.99510600 |
| H | 2.22440700  | -1.281203100 | 3.77754300  | H | -0.47492500 | -4.23687200 | -3.14517800  | H  | -1.31128500 | -1.70228200 | 1.47758000  | C  | 5.40844700  | 1.67280600  | -2.88537300 |
| H | 1.76623300  | -0.12814100  | 2.98864400  | H | 0.55541000  | -5.94981900 | 1.34254800   | C  | 6.25114000  | 2.55444000  | -1.83742400 | C  | 6.25114000  | 2.55444000  | -1.83742400 |
| C | 6.06596600  | 0.06143700   | -6.10840300 | H | 1.52323400  | -2.67384800 | 0.40635500   | H  | -1.34320300 | -3.31794300 | 0.71241300  | C  | 9.39418100  | 1.88837000  | -3.74196600 |
| C | 5.56641900  | 0.76354400   | -7.35861300 | H | 3.79904300  | -3.44565400 | 2.80314000   | C  | 1.32978800  | -1.34521700 | -1.29380400 | F  | 5.95970300  | -0.19790400 | -0.17990400 |
| H | 7.09320400  | -0.29686600  | -6.18759500 | H | 1.37930900  | -0.21505300 | 2.70290800   | C  | 1.38868500  | -5.10888800 | -2.89490000 | F  | 4.82769700  | 3.62211100  | -1.67184600 |
| H | 9.57106000  | 0.68745000   | -5.22309100 | H | 4.70320500  | 0.72901500  | -6.78831200  | C  | 1.68937700  | -5.16582100 | -4.40042700 | F  | 6.94354500  | 1.81843900  | 0.02434000  |
| C | 5.76094100  | -2.37969600  | -7.78572400 | C | 3.82927800  | 1.08688300  | -7.97442000  | H  | 2.03196900  | -5.78287100 | -2.32485000 | F  | 8.59173500  | 1.12146200  | -0.38092700 |
| C | 5.88187800  | 0.04808200   | -8.67902800 | H | 5.76865900  | 0.77107900  | -7.01917300  | C  | 0.36129700  | -5.44125800 | -2.70182300 |    |             |             |             |
| H | 4.48961900  | 0.95063200   | -7.25685200 | H | 4.49211800  | 1.33619400  | -5.91088200  | C  | 3.96516200  | -2.90300000 | -4.96822400 |    |             |             |             |
| H | 6.05143900  | 1.74824200   | -7.36017900 | C | 5.20079000  | -1.76237100 | -8.31490300  | C  | 3.17379800  | -5.36037600 | -4.76420700 |    |             |             |             |
| C | 5.26034200  | -1.34677600  | -8.82352800 | C | 4.26245000  | 0.44827100  | -9.30084900  | H  | 1.28866200  | -4.26366400 | -4.87647600 | C  | 0.20791900  | -1.23133600 | 0.54297000  |
| C | 6.68197700  | -2.32275200  | -7.36346400 | C | 2.78259700  | 0.85504300  | -7.73640900  | H  | 1.13606300  | -6.01146900 | -4.82816100 | C  | -0.26382800 | -1.35536000 | 1.87611200  |
| C | 5.51803400  | -3.39836800  | -8.09230000 | H | 3.89506700  | 2.17779500  | -8.06867200  | H  | 4.162545100 | -2.15335000 | -4.53168400 | C  | 1.62595300  | -1.21372300 | 0.57546100  |
| H | 6.97184500  | -0.03253500  | -8.97198600 | H | 4.23759700  | -1.08614000 | -9.32346500  | C  | 4.62545100  | -2.15335000 | -4.53168400 | C  | 0.20369300  | -1.34659300 | 1.92576600  |
| H | 5.53075400  | 0.67406600   | -9.50728800 | C | 6.17995600  | -1.26584100 | -8.34100900  | C  | 3.93733500  | -2.54359800 | -4.90398100 | C  | 3.05907200  | -1.37692200 | 2.27746500  |
| H | 4.16468600  | -1.28831600  | -8.78470400 | C | 5.35940700  | -2.81362300 | -8.56246700  | H  | 5.19510700  | -6.31086100 | -4.33136400 | C  | 0.86485900  | -1.43694100 | 2.73241600  |
| O | 5.51482600  | -1.75059500  | -9.80884500 | H | 3.21861400  | -1.46101500 | -9.16153400  | H  | 4.07553300  | -4.09779700 | -3.23063100 | C  | 0.98195000  | -5.45607200 | 3.12188400  |
| O | 4.52317500  | -3.16848900  | -5.92374100 | H | 4.54150700  | -1.43244900 | -10.31687200 | O  | 1.52051200  | -2.68541200 | -2.92370800 | C  | 1.95970400  | -4.50933200 | 3.51636600  |
| B | 6.95976000  | -1.94076900  | -3.08210700 | C | 4.41623600  | -0.64115900 | -6.26805900  | H  | 1.47679600  | -3.71115000 | -2.26279700 | C  | 4.23628800  | -0.63003000 | 1.91403400  |
| C | 11.28473300 | -1.85839600  | -2.76940000 | C | 4.70697500  | -1.71358900 | -6.90671000  | O  | 1.44694000  | -3.74126700 | -0.94195500 | Zr | 0.94830000  | -5.96765000 | 1.57003800  |
| C | 12.26416900 | -2.69557300  | -3.30786300 | C | 4.54380200  | -2.83004900 | -6.29536200  | H  | 0.99925500  | 0.52152600  | -1.63418800 | C  | -1.26299300 | -4.18800100 | 1.41450100  |
| C | 11.79781000 | -0.78222600  | -2.03801400 | C | 9.86148700  | -0.16701000 | -2.24575300  | H  | 0.08237800  | 0.38531400  | 0.73827700  | C  | -1.74971300 | -0.40406500 | 2.38897100  |
| C | 13.63289800 | -2.51423000  | -3.10757600 | C | 8.26806600  | -0.62992100 | -2.21253900  | H  | -0.34789500 | -3.40322300 | 3.39603800  | H  | -1.83411300 | -3.61085400 | 0.67308100  |
| C | 13.15105800 | -0.56230300  | -1.80962100 | C | 10.86510300 | -1.13397000 | -2.11895300  | H  | 0.11202000  | -5.39138500 | 1.63811800  | H  | -1.35412300 | -5.25149100 | 1.15350500  |
| C | 10.82889000 | -1.44155900  | -2.35058600 | C | 10.34244200 | 1.10154800  | -2.57727200  | H  | 2.75614600  | -5.48051700 | 1.15521000  | H  | 2.26962200  | -1.57024000 | -0.29177900 |
| C | 9.16395200  | -3.41772100  | -3.66394200 | C | 12.22367500 | -0.88154800 | -2.27351000  | C  | 3.93856700  | -3.56303400 | 2.61263400  | C  | 1.03212300  | -4.91135300 | -2.90484700 |
| O | 9.48995300  | -4.58557900  | -2.96313100 | C | 11.69249300 | 1.40066200  | -2.75248500  | C  | 2.10719900  | -2.26539400 | 3.99096000  | C  | 1.48493000  | -6.89509000 | -4.35435300 |
| C | 8.28703800  | -3.63686800  | -4.72268000 | C | 12.64565500 | 0.40407000  | -2.59730300  | C  | 2.04740900  | 0.07598100  | 2.55319200  | H  | 1.51915900  | -5.79369600 | -2.47196100 |
| O | 9.02520900  | -5.85524200  | -3.29029800 | H | 8.15396100  | -1.46964400 | -3.64586300  | C  | 5.68412600  | 0.76907400  | -7.18816700 | H  | -0.04585600 | -5.12971600 | -2.87957500 |
| C | 7.78679000  | -4.88463600  | -5.08784100 | C | 8.11122100  | -2.88848000 | -3.79372900  | C  | 6.49078300  | 1.11924400  | -8.44148700 | C  | 3.80603900  | -2.44863000 | -8.85604800 |
| H | 8.15722600  | -6.01006600  | -4.36669300 | C | 8.22217800  | -0.78182800 | -4.85995300  | H  | 4.66483100  | 0.02523400  | -7.17912200 | C  | 2.99571800  | -4.87195900 | -4.60122900 |
| H | 6.89092900  | -1.79846200  | -1.73719900 | C | 8.07678700  | -3.50872200 | -5.02954800  | C  | 5.40815000  | 1.21737000  | -6.24493700 | H  | 1.15173500  | -3.69922500 | -4.68625300 |
| C | 7.31138800  | -1.63223500  | -1.89043900 | C | 8.20531900  | -1.38427700 | -6.11113600  | C  | 0.95828700  | -2.20270700 | -8.47965700 | C  | 0.95828700  | -2.20270700 | -8.47965700 |
| C | 6.90976200  | -1.97742900  | -4.01201000 | C | 8.11574500  | -2.76852800 | -6.20210400  | C  | 5.19121400  | 0.16635200  | -9.62156000 | C  | 3.92783600  | -3.75603700 | -4.09337800 |
| C | 3.69707300  | -1.61267900  | -0.84511200 | C | 8.54189800  | -1.62724300 | -0.31125900  | H  | 4.438296500 | 1.19067400  | -8.19905600 | H  | 4.43652000  | -1.66521800 | -4.40232000 |
| C | 8.21268800  | -1.94885000  | 0.67554600  | C | 8.54189800  | -1.62724300 | -0.31125900  | C  | 5.25842200  | 2.13398100  | -8.71846700 | C  | 2.77925500  | -2.02719400 | -4.88232500 |
| C | 6.85632000  | -1.76147600  | 0.45734000  | C | 6.60748500  | -2.19777200 | -0.87490800  | C  | 4.15980000  | -1.21597300 | -9.53696300 | C  | 3.16237600  | -4.98949100 | -5.67984800 |
| F | 15.39551700 | -1.25044600  | -2.15000400 | C | 8.54189800  | -1.62724300 | -0.31125900  | H  | 6.15740600  | -2.18       |             |    |             |             |             |



|   |             |             |             |   |             |              |              |    |             |             |             |    |             |             |              |
|---|-------------|-------------|-------------|---|-------------|--------------|--------------|----|-------------|-------------|-------------|----|-------------|-------------|--------------|
| C | 7.81327200  | -3.58039500 | -4.91774100 | C | 5.82235200  | -0.08597500  | -9.51931600  | C  | 2.64649600  | -5.18569600 | 2.89347600  | C  | 8.21752700  | 3.06692700  | -7.26319700  |
| C | 8.35413200  | -1.65313200 | -6.21940000 | H | 4.16412700  | 1.13656000   | -8.78190900  | C  | 2.37178200  | -6.11642100 | 0.81333100  | O  | 7.50651100  | 2.23546200  | -7.99871300  |
| C | 8.02715700  | -3.00262700 | -6.16115000 | H | 5.42404900  | 2.06083000   | -9.58623200  | C  | 3.46093800  | -4.46365200 | 1.97739300  | C  | 7.23017600  | 1.35477000  | -2.79220300  |
| C | 7.74129100  | -1.08298100 | -1.03720900 | C | 4.87538800  | -1.30956800  | -9.56243000  | C  | 3.29229800  | -5.04301200 | 0.69393200  | C  | 7.30904600  | 2.53310500  | -2.04270400  |
| C | 6.42599700  | -1.55783600 | -1.01738000 | H | 5.99000400  | -2.58411700  | -8.18461400  | Zr | 1.02908500  | -3.95073500 | 1.28368500  | C  | 6.18956700  | 1.34998800  | -3.72447000  |
| C | 8.34574800  | -1.04035000 | 0.22149200  | H | 4.43781100  | -3.22437300  | -8.64920600  | C  | -0.86170900 | -5.15763100 | 1.77481600  | C  | 6.47466500  | 3.26945000  | -2.21798900  |
| C | 5.76671200  | -1.99083300 | 1.02536700  | H | 6.75483600  | -0.36393900  | -9.01285800  | H  | -1.00987100 | -5.39727200 | 2.83637400  | C  | 5.34295200  | 2.43719100  | -3.94867400  |
| C | 7.71839800  | -1.45297900 | 1.39863200  | H | 6.11061800  | 0.14072100   | -10.55214900 | H  | -1.74856900 | -4.60375500 | 1.43528800  | C  | 5.48418500  | 3.91909000  | -3.19168800  |
| C | 6.41574000  | -1.92844100 | 1.35164700  | H | 3.83888100  | -0.97491900  | -9.62990400  | H  | -0.83238000 | -6.10696800 | 1.22083200  | F  | 4.40470400  | 2.38408600  | -4.91291800  |
| F | 14.19572400 | -0.02041000 | -2.71527300 | H | 5.12292800  | -1.88990200  | -10.45970500 | H  | 1.13471700  | -1.01166200 | 0.05702300  | F  | 5.94142300  | 0.26963500  | -4.49323000  |
| F | 12.64380300 | 2.08888600  | -3.54034900 | O | 3.75980900  | -0.74611300  | -6.92591700  | C  | 0.07797400  | -4.00563200 | -3.05570500 | F  | 4.68333700  | 4.65322000  | -3.39317400  |
| F | 10.01477000 | 1.98742400  | -3.38442900 | C | 4.33009700  | -1.81136500  | -7.08657400  | C  | 0.65397100  | -3.77384300 | -4.46260000 | F  | 6.63135200  | 0.26729900  | -1.45886200  |
| F | 10.31567000 | -2.42466100 | -1.60104300 | O | 4.47318600  | -2.73670500  | -6.12782800  | H  | -0.02776200 | -5.07434300 | -2.83624300 | F  | 8.24580800  | 2.65801200  | -1.07656800  |
| F | 12.98011400 | -2.27463200 | -1.73782400 | B | 8.25134800  | -0.08591500  | -2.43871800  | H  | -0.93746900 | -3.58554800 | -3.00347700 | C  | 5.88612800  | 7.58488700  | -2.70911600  |
| F | 8.72192000  | 0.39836300  | -5.18431200 | C | 9.87337700  | 0.25814400   | -2.39704400  | C  | 3.85720700  | -3.24675600 | -4.18809200 | C  | 6.05540000  | 9.08477100  | -2.50589100  |
| F | 8.57818700  | -1.06206200 | -7.41338400 | C | 10.77611100 | -0.71285300  | -1.94930700  | C  | 1.81806100  | -4.70554600 | -4.84941200 | H  | 5.74849500  | 7.04377500  | -1.76974800  |
| F | 7.90570300  | -3.72053300 | -7.28885300 | C | 10.48751000 | 1.38989000   | -2.93351100  | H  | 0.95615600  | -2.72599900 | -4.55879100 | C  | 5.03843000  | 7.36503700  | -3.35785900  |
| F | 7.48059700  | -4.87887900 | -8.83711100 | C | 12.15934600 | -0.57559600  | -1.98682800  | H  | -0.15205900 | -3.93216100 | -5.19095200 | C  | 8.56001900  | 7.41540600  | -1.56517300  |
| F | 7.69957900  | -3.47465800 | -2.61017400 | C | 11.86807900 | 1.57029800   | -3.00314300  | C  | 3.11191900  | -4.56880900 | -4.02867700 | C  | 7.00103500  | 9.47364200  | -1.36211800  |
| F | 5.17026600  | -1.60655900 | -2.16523700 | C | 12.71505800 | 0.58269100   | -2.52029200  | H  | 4.67099000  | -3.17482600 | -3.46393800 | H  | 6.37888300  | 9.53538500  | -3.45429800  |
| F | 4.50139500  | -2.45257300 | 0.05813700  | C | 8.17502300  | -1.15430700  | -3.71112800  | H  | 3.20699000  | -2.38122800 | -4.07166400 | H  | 5.05653600  | 9.48085200  | -2.29648800  |
| F | 5.78440500  | -2.31311100 | 2.47748100  | C | 7.99546500  | -2.53734400  | -3.63580100  | H  | 2.05311600  | -4.54389000 | -5.91006300 | C  | 8.43743000  | 9.95524000  | -1.50668200  |
| F | 8.36072700  | -1.37987400 | 2.57598900  | C | 8.41415800  | -0.69768200  | -5.00845900  | H  | 3.79761400  | -5.38183100 | -4.30177100 | H  | 7.92008100  | 8.95215600  | -0.80396400  |
| F | 9.60113300  | -0.57215400 | 0.38010800  | C | 7.97379600  | -3.37842200  | -4.75032000  | H  | 2.89890900  | -4.70035200 | -2.96031400 | F  | 9.58653300  | 7.10512600  | -1.36015200  |
| C | 8.36152300  | 4.37067000  | -5.18413200 | C | 8.42515000  | -1.49323800  | -6.14495600  | H  | 2.08799000  | -3.33644800 | -1.92269300 | H  | 6.58423400  | 9.10069100  | -4.91580600  |
| C | 9.09933300  | 5.40431100  | -6.01868000 | C | 8.18653400  | -2.85621800  | -6.01785200  | H  | 1.50184400  | -2.31152300 | -2.07903000 | H  | 7.02627100  | 10.56688300 | -1.27905600  |
| C | 9.01740100  | 3.78095400  | -4.54068400 | C | 7.64053600  | -0.68782400  | -1.01771500  | C  | 0.85306100  | -3.33644800 | -1.92269300 | H  | 8.91537000  | 9.39225500  | -2.39370200  |
| H | 7.57329500  | 4.82267200  | -4.58417800 | C | 6.36420200  | -1.25875400  | -1.00038000  | O  | 0.72584600  | -3.95090000 | -0.75519900 | H  | 9.02325200  | 9.29189300  | -0.64418600  |
| C | 9.62268000  | 2.47703000  | -7.03829100 | C | 8.20900400  | -0.53829600  | 0.24979000   | H  | -1.32165500 | -1.79589600 | 0.82489000  | C  | 7.00219800  | 6.97462500  | -3.43420100  |
| C | 10.39995000 | 4.91157400  | -6.66784100 | C | 5.71425300  | -1.697177100 | 0.14774400   | H  | 1.15351900  | -2.71755100 | 3.34925000  | C  | 8.20699700  | 6.82955100  | -2.90851200  |
| H | 8.41026500  | 5.81348700  | -6.76821300 | C | 7.58630100  | -0.94140300  | 1.43828500   | H  | 1.28421400  | -6.92981200 | 2.58740300  | O  | 9.06297400  | 6.22457200  | -3.57068400  |
| H | 9.33175700  | 6.22928500  | -5.33331000 | C | 6.32692400  | -1.52174600  | 1.38240100   | H  | 2.01795700  | -6.74361300 | 0.00445900  |    |             |             |              |
| C | 10.22692600 | 3.75842600  | -7.66370600 | F | 14.04638500 | 0.73654400   | -2.57825800  | H  | 3.76353000  | -4.69834000 | -0.21736800 |    |             |             |              |
| H | 10.08805700 | 2.27918100  | -6.06484700 | F | 12.38214900 | 2.68842000   | -3.54887400  | H  | 4.10612600  | -3.62956900 | 2.21506600  |    |             |             |              |
| H | 7.98599700  | 1.60340800  | -7.66983500 | F | 9.75627300  | 2.40637100   | -3.46338500  | H  | 2.56269100  | -4.99692300 | 3.95677600  |    |             |             |              |
| H | 11.09580300 | 4.59848800  | -7.69749900 | F | 10.30879600 | -1.88011700  | -1.45455200  | H  | 4.40773600  | -2.48786200 | 4.14738400  |    |             |             |              |
| H | 10.87456000 | 5.75386100  | -7.18403300 | F | 12.96121100 | -1.55075000  | -1.52753600  | C  | 6.70046000  | -2.48952000 | -8.14014200 |    |             |             |              |
| H | 9.61921500  | 4.07274300  | -8.52174700 | F | 8.63716600  | 0.63018200   | -5.21654800  | C  | 5.44335700  | 1.27365500  | -8.79751900 |    |             |             |              |
| H | 11.20750700 | 3.47923700  | -8.06281700 | F | 8.64014600  | -0.95686700  | -7.36588900  | F  | 6.65372500  | 2.67319600  | -7.14693900 |    |             |             |              |
| O | 7.58710400  | 3.34109600  | -6.01587700 | F | 8.14145100  | -3.64093000  | -7.10650300  | H  | 5.95390800  | 3.39546000  | -8.74347400 |    |             |             |              |
| C | 8.14942600  | 2.57762900  | -6.81986900 | F | 7.72005900  | -4.68912100  | -4.60184200  | C  | 4.83783700  | -2.45210100 | -7.70502400 |    |             |             |              |
| O | 7.39971200  | 1.81080500  | -7.51361300 | F | 7.79898300  | -3.15768000  | -2.45551300  | C  | 5.50837000  | 0.00990800  | -7.93017400 |    |             |             |              |
| C | 4.49766600  | 0.97015300  | -2.55151000 | F | 5.67928200  | -1.41215900  | -2.15769900  | H  | 4.39522800  | -1.53358000 | -9.00068600 |    |             |             |              |
| C | 7.75050400  | 2.00545500  | -1.64346100 | F | 4.49190800  | -2.25711600  | 0.07658500   | C  | 5.91905000  | 1.10116400  | -9.77263600 |    |             |             |              |
| C | 6.41898600  | 1.22068000  | -3.39991400 | F | 5.69984100  | -1.90388300  | 2.511233500  | C  | 4.78010100  | -1.18284200 | -8.56293600 |    |             |             |              |
| C | 7.04116100  | 3.20118400  | -1.59780300 | F | 8.19228500  | -0.76211800  | 2.61840800   | H  | 5.86978100  | -2.72949400 | -7.46436300 | Zr | 0.96207100  | -4.72754700 | 1.26373700   |
| C | 5.68478500  | 2.40691000  | -3.40185300 | F | 9.42073900  | 0.03220700   | 0.41097400   | H  | 4.41719300  | -3.30094800 | -8.26314600 | C  | -0.69963200 | -6.22664100 | 1.76644600   |
| C | 5.99827700  | 3.40925900  | -2.49463300 | C | 7.96158100  | -4.58749300  | -5.52252100  | H  | 5.06806400  | 0.22877800  | -6.94983700 | H  | -1.13371300 | -6.13002000 | 2.77119300   |
| F | 4.69652200  | 2.59671000  | -4.29522700 | C | 8.60208700  | 5.59849800   | -6.46567400  | H  | 6.35807000  | -0.25383600 | -7.75327400 | H  | -1.51858400 | -6.12054300 | 1.04083800   |
| F | 6.02488400  | 0.30971400  | -4.32474100 | H | 8.66286600  | 4.11886800   | -4.83196100  | H  | 7.12910200  | -0.92255900 | -8.73809000 | H  | -3.03338400 | -7.24754700 | 1.67380600   |
| F | 5.32736100  | 4.57279900  | -2.50267700 | H | 7.13630600  | 5.01860100   | -4.96150800  | H  | 5.22255200  | -1.40621500 | -9.54294400 | H  | 9.03064100  | -3.79022000 | -0.90102500  |
| F | 7.36080800  | 4.15969300  | -0.71173800 | C | 9.40463200  | 2.65482200   | -7.18292900  | C  | 3.07478300  | -1.61159300 | -6.26468800 | C  | 1.60459900  | -6.60779000 | -2.71976400  |
| F | 8.75219500  | 1.87835500  | -0.74661800 | C | 9.95085500  | 5.17400000   | -7.05344300  | C  | 4.03465200  | -2.34260200 | -6.41733900 | C  | 2.14178100  | -6.31609100 | -4.13028300  |
|   |             |             |             | H | 7.88337700  | 5.86495600   | -7.24352400  | O  | 4.50870600  | -3.19195100 | -5.48851000 | C  | 2.33147000  | -6.17315600 | -2.12601300  |
|   |             |             |             | H | 8.75053400  | 6.49179700   | -5.84177800  | B  | 3.23300000  | 0.08248600  | -2.40988200 | H  | 0.70911700  | -7.24297700 | -2.79161600  |
|   |             |             |             | C | 9.90646800  | 3.91620500   | -7.92974100  | C  | 8.93163800  | 0.52637300  | -2.31519500 | C  | 3.34960100  | -3.29758200 | -4.19066300  |
|   |             |             |             | H | 9.86258700  | 2.60180000   | -6.18762100  | H  | 10.76201100 | -0.31234300 | -1.69077900 | C  | 3.61453200  | -5.86623000 | -4.18145500  |
|   |             |             |             | H | 9.66138600  | 1.74077500   | -7.72039200  | C  | 10.41136500 | 1.62387100  | -2.95124500 | H  | 1.49161900  | -5.57311800 | -4.60586900  |
|   |             |             |             | H | 10.66177200 | 5.01035000   | -6.23223700  | H  | 12.13240100 | -0.07520600 | -1.65416700 | H  | 2.05283300  | -7.23283300 | -4.472732400 |
|   |             |             |             | H | 10.34926500 | 6.00367400   | -7.64917600  | C  | 11.77650000 | 1.90202800  | -2.94924000 | C  | 3.95460800  | -4.52074000 | -3.51642700  |
|   |             |             |             | H | 9.29202400  | 4.08416100   | -8.82384600  | H  | 12.64952400 | 1.04856100  | -2.28987100 | C  | 3.59523200  | -2.38643000 | -3.63737500  |
|   |             |             |             | H | 10.91672000 | 3.68811200   | -8.258543200 | C  | 8.28571500  | -1.11307600 | -3.56042200 | H  | 2.26292300  | -3.86112600 | -2.47533800  |
|   |             |             |             | C | 7.27751700  | 3.48498200   | -6.27059300  | C  | 8.28047700  | -2.48696000 | -3.30356700 | H  | 3.92895900  | -5.81934400 | -5.23177300  |
|   |             |             |             | C | 7.92272800  | 2.64859300   | -7.00029300  | C  | 4.80592700  | -0.79588400 | -4.90643700 | H  | 4.23298800  | -6.64633900 | -3.14691600  |
|   |             |             |             | C | 7.25907600  |              |              |    |             |             |             |    |             |             |              |

|   |             |             |              |
|---|-------------|-------------|--------------|
| C | 8.02125800  | -0.06235400 | -5.09746300  |
| F | 7.36980500  | -2.72164300 | -4.99468200  |
| C | 8.05907100  | -0.81732100 | -6.26304200  |
| C | 7.70283500  | -2.16352400 | -6.21483400  |
| C | 6.85101500  | -0.13999700 | -1.19983600  |
| C | 5.52329000  | -0.54493700 | -1.07066700  |
| C | 7.25505400  | -0.07493200 | 0.13629600   |
| C | 4.67420000  | -0.90555700 | -0.33040600  |
| C | 6.43491800  | -0.41055700 | 1.21373700   |
| C | 5.31196700  | -0.82463100 | 0.97843100   |
| F | 13.55893200 | 0.00765900  | -1.80282600  |
| F | 12.46924600 | 2.25983200  | -2.93155000  |
| F | 9.84800100  | 2.49703600  | -3.22199200  |
| F | 9.25831100  | -1.80405100 | -1.26763300  |
| F | 11.90111700 | -2.01330600 | -0.97678600  |
| F | 8.38123700  | 1.23986600  | -5.23019100  |
| F | 8.39093100  | -0.25542600 | -7.44240600  |
| F | 7.70791000  | -2.90409300 | -7.33557900  |
| F | 7.05127500  | -4.02505900 | -4.92685700  |
| F | 6.98343600  | -2.56591900 | -2.71741500  |
| F | 4.98993700  | -0.59766100 | -2.61196400  |
| F | 3.41568300  | -1.31819400 | -0.57703900  |
| F | 4.32111600  | -1.14311700 | 2.00809500   |
| F | 6.89130800  | -0.32428100 | 2.47500900   |
| F | 8.49743900  | 0.33570300  | 0.47223900   |
| C | 10.74361300 | 5.24648800  | -3.72911800  |
| C | 10.57394600 | 5.44293300  | -5.22738100  |
| C | 8.84865900  | 3.27457700  | -7.99282000  |
| C | 9.92290700  | 4.20340200  | -5.86512000  |
| H | 9.93331800  | 6.31438900  | -5.41317700  |
| H | 11.55050800 | 5.65027000  | -5.68214900  |
| C | 9.78205800  | 4.33029000  | -7.38931900  |
| H | 9.08621600  | 2.26549000  | -7.63690100  |
| H | 8.93425100  | 3.24114700  | -9.08516500  |
| H | 9.85556600  | 4.06241400  | -5.42082900  |
| H | 10.03853000 | 3.30593300  | -6.62212800  |
| H | 9.39374200  | 5.32444000  | -7.62434700  |
| H | 10.77045100 | 4.24481800  | -7.188855600 |
| O | 6.96042200  | 4.52781900  | -7.08335300  |
| O | 7.38413300  | 3.54507400  | -7.68937900  |
| O | 6.59805400  | 2.56897100  | -8.17012800  |
| C | 7.11086800  | 1.92191300  | -2.70427000  |
| C | 7.45735700  | 2.96470200  | -1.83443400  |
| C | 6.10697000  | 2.25974800  | -3.61339600  |
| C | 6.91450500  | 4.24293800  | -1.89727000  |
| C | 5.52002200  | 3.52384700  | -3.69631500  |
| C | 5.93341000  | 4.52866500  | -2.83443900  |
| F | 4.56454100  | 3.77764300  | -6.40535000  |
| F | 5.63820300  | 1.58643000  | -4.50166600  |
| F | 5.40292100  | 5.76550600  | -2.90833500  |
| F | 7.34099700  | 5.21722400  | -1.05786800  |
| F | 8.38680200  | 2.77025500  | -0.87104200  |
| C | 8.00563700  | 8.02582100  | -3.21256000  |
| C | 8.05514000  | 9.36239600  | -3.02946600  |
| H | 8.14283400  | 8.11047600  | -1.23008500  |
| H | 7.12802000  | 7.43556600  | -2.52515600  |
| C | 10.89571700 | 8.60735700  | -2.00273600  |
| C | 9.07632800  | 10.36201000 | -2.56509400  |
| H | 8.06772500  | 9.18608100  | -4.11092400  |
| H | 1.01148900  | 9.79063300  | -2.84277700  |
| H | 10.52282900 | 9.90362100  | -2.76784700  |
| H | 10.50826200 | 8.62527300  | -0.97546100  |
| H | 11.97880800 | 8.48433700  | -1.94689100  |
| H | 8.91514500  | 10.58590100 | -1.50103900  |
| H | 8.92900800  | 11.30524300 | -3.10383200  |
| H | 10.74170400 | 9.76862400  | -3.83477400  |
| H | 11.20128000 | 10.68336100 | -2.40688300  |
| O | 9.09891000  | 7.12792400  | -2.80649400  |
| O | 10.34786000 | 7.37738600  | -2.64675700  |
| C | 11.19410000 | 6.52096000  | -3.08377100  |
| H | 11.54484900 | 4.55562900  | -3.47443500  |
| H | 9.82536500  | 4.94158300  | -3.23239800  |

  

| D. Hafnocene systems       |             |             |             |
|----------------------------|-------------|-------------|-------------|
| <i>Cr:HfMe<sup>c</sup></i> | 0.19404700  | -0.07032100 | -0.22957000 |
| C                          | -0.15096600 | 0.19603500  | 1.11849000  |
| C                          | 1.61656900  | -0.18990100 | -0.31097500 |
| C                          | 2.14638200  | 0.02759500  | 0.98890700  |
| C                          | 3.19509800  | 0.03827400  | 1.25483000  |
| H                          | 1.05663300  | 0.23160300  | 1.88201600  |
| C                          | 1.17580200  | -1.14902400 | 2.42796800  |
| C                          | 2.18276600  | -3.20294800 | 2.83924100  |
| C                          | 1.40947800  | -4.53865100 | 1.13150900  |
| C                          | 3.05972900  | -3.04550100 | 1.72831800  |
| C                          | 2.56972200  | -3.84687200 | 0.66373000  |
| Hf                         | 0.81449700  | -2.10781900 | 1.07846900  |
| C                          | -1.31407900 | -2.69428900 | 1.19382300  |
| H                          | -1.65433300 | -2.47553700 | 2.22656900  |
| H                          | -1.91125200 | -2.12821700 | 0.54204500  |
| H                          | -1.59412100 | -3.76226200 | 1.04349300  |
| H                          | 2.19357700  | -0.34668400 | -1.21470100 |
| H                          | -0.50179700 | -0.15704900 | -1.05607000 |
| H                          | -1.15253100 | 0.34463900  | 1.50057100  |
| H                          | 0.37317300  | -4.50522200 | 3.10624800  |
| H                          | 0.81720400  | -5.24707900 | 5.56494600  |
| H                          | 3.03113500  | -3.96138400 | -0.31093200 |
| H                          | 3.94683600  | -2.42661300 | 1.70122800  |
| H                          | 2.30637800  | -2.74899700 | 3.81569800  |
| H                          | 1.13492600  | 0.45452800  | 2.94008000  |

  

| C <sup>c</sup> -Hf-Complex |             |             |             |
|----------------------------|-------------|-------------|-------------|
| C                          | -0.25647600 | -0.44424900 | -0.64145900 |
| C                          | -0.10084900 | -0.17431200 | 0.74276000  |
| C                          | 1.03834900  | -0.55021800 | -1.21743600 |
| C                          | 1.99569100  | -0.37377700 | -0.18881600 |
| H                          | 3.07039800  | -0.37392100 | -0.31306400 |
| C                          | 1.28951400  | -1.42521000 | 1.02923100  |
| C                          | 1.35347200  | -0.40409600 | 2.34338300  |
| C                          | 2.29400800  | -2.97633200 | 2.35657100  |
| C                          | 1.57860400  | -4.80809900 | 1.17274300  |
| C                          | 3.12399300  | -3.10741800 | 1.20424400  |
| C                          | 2.68151500  | -4.23758000 | 0.47669100  |
| Hf                         | 0.80279100  | -2.51645700 | 0.39390800  |
| H                          | -1.20637100 | -2.91417800 | 1.30623800  |
| H                          | -1.33705800 | -2.53142800 | 2.32754300  |
| H                          | -2.00062100 | -2.45937200 | 0.69819500  |
| H                          | -1.39895100 | -3.99531300 | 1.35059600  |
| H                          | 1.26134600  | -0.74326600 | -2.25916300 |
| H                          | -1.19957700 | -0.53794300 | -1.16499800 |
| H                          | -0.90156200 | -0.02528100 | 1.45414200  |
| H                          | 0.59559700  | -4.22937900 | 3.09084900  |
| H                          | 1.01884400  | -5.68535600 | 0.87316100  |
| H                          | 3.10986100  | -4.60009200 | -0.44963500 |
| H                          | 3.96101700  | -2.47205100 | 0.94715700  |
| H                          | 2.40395900  | -2.23641200 | 3.13895000  |
| H                          | 1.73611000  | 0.07825500  | 1.98987200  |
| C                          | 2.22289900  | -3.98093900 | -4.42376700 |
| C                          | 1.39939200  | -3.36865600 | -5.55855000 |
| H                          | 2.23552200  | -5.07505800 | -4.46638000 |
| H                          | 3.25067700  | -3.61886900 | -4.44494200 |
| C                          | -0.89929000 | -4.74300700 | -3.35982000 |
| C                          | 0.05060000  | -0.05385500 | -5.81900100 |
| H                          | 1.26856200  | -2.29724500 | -5.35650400 |
| H                          | 2.01446800  | -3.43446700 | -6.46466800 |
| O                          | -9.22621000 | -0.03705900 | -4.63422400 |
| O                          | 0.07268400  | -5.70151300 | -3.63403900 |
| H                          | -1.20748200 | -4.95726200 | -2.66898200 |
| H                          | 0.23165700  | -5.09571400 | -6.11807400 |
| H                          | -0.43093000 | -3.57017700 | -6.67597000 |
| H                          | -1.21352900 | -3.00812400 | -4.38608500 |
| H                          | -1.84362500 | -4.55520400 | -4.90211700 |
| O                          | 1.77047600  | -3.57252400 | -3.99891000 |
| C                          | 0.61068800  | -3.92380500 | -2.59366300 |
| O                          | 3.50444300  | -3.52995800 | -1.43782900 |

  

| C <sup>c</sup> -Hf-RI |             |             |              |
|-----------------------|-------------|-------------|--------------|
| C                     | -0.26290100 | 0.06604500  | 0.21666200   |
| C                     | -0.17015400 | 0.01686400  | 1.63061700   |
| C                     | 1.05622000  | 0.15170700  | -0.30950600  |
| C                     | 1.96436300  | 0.13347200  | 0.77593100   |
| H                     | 3.04146900  | 0.20693700  | 0.70618900   |
| C                     | 1.20622900  | 0.03867300  | 1.98028900   |
| C                     | 6.87189000  | -3.92477000 | 2.39629600   |
| C                     | 2.64714200  | -2.87885700 | 2.39344400   |
| H                     | 1.69577100  | -4.53010400 | 1.11280000   |
| C                     | 3.26231000  | -2.84981800 | 1.10721900   |
| C                     | 2.68036600  | -3.87675300 | 3.02455600   |
| H                     | -1.04565900 | -2.83268400 | 1.74693600   |
| H                     | -1.12121000 | -2.65786500 | 2.82873200   |
| H                     | -1.90370200 | -2.32237500 | 1.28691900   |
| H                     | -1.18132400 | -3.91224800 | 1.59398700   |
| H                     | 1.32397000  | 0.20980100  | -1.35707400  |
| C                     | -0.58822700 | -3.50568600 | -3.23590300  |
| C                     | -0.65878400 | -3.11061700 | -4.71923200  |
| H                     | -0.43867400 | -4.59131300 | -3.13159600  |
| H                     | -1.52722100 | -3.28959000 | -2.71762400  |
| C                     | 1.24253100  | -2.48535400 | -4.23395000  |
| C                     | 0.41453300  | -3.77940600 | -5.59053100  |
| H                     | -0.59867500 | -2.01866400 | -4.80735700  |
| H                     | -1.65371500 | -3.38222900 | -5.08717300  |
| C                     | 1.81896200  | -3.75111100 | -4.96171500  |
| H                     | 3.21290200  | -2.34473400 | -4.06440000  |
| H                     | 1.77645200  | -1.57472600 | -4.75641200  |
| H                     | 0.45232200  | -3.26657700 | -6.55593400  |
| H                     | 1.13429400  | -4.82094500 | -5.78905400  |
| H                     | 2.56808900  | -3.85675000 | -5.75236800  |
| H                     | 1.97545900  | -4.59355800 | -4.27415700  |
| O                     | 1.62428000  | -2.39931600 | -2.83714100  |
| C                     | 0.48411200  | -2.84737800 | -2.39965600  |
| O                     | 0.27485100  | -2.72569000 | -1.16718100  |
| H                     | -1.18009600 | 0.05246100  | -0.35878100  |
| H                     | -1.00064000 | -0.03659500 | 2.30623000   |
| H                     | 1.05640000  | -4.20866000 | 3.22745000   |
| H                     | 1.06694400  | -5.35295000 | 0.96907200   |
| H                     | 2.93696600  | -4.11103900 | -0.70085400  |
| H                     | 4.06260800  | -2.18988400 | 0.79718100   |
| H                     | 2.90594100  | -2.25076100 | 3.23576200   |
| H                     | 1.60544200  | 0.04694700  | 2.98632000   |
| C                     | 2.46478300  | 1.88991800  | -7.97144500  |
| C                     | 1.52295800  | 2.09659000  | -9.15576100  |
| C                     | 3.51712900  | 1.96123500  | -8.27270500  |
| C                     | 2.28532800  | 2.64429600  | -7.20269000  |
| C                     | 3.05053600  | -0.64147500 | -9.22395600  |
| H                     | 1.92996000  | 1.35169300  | -10.43428900 |
| H                     | 0.50954000  | 1.81224900  | -8.84253100  |
| H                     | 1.49218900  | 3.17328800  | -9.36607700  |
| C                     | 2.03132300  | -0.17168000 | -10.28806400 |
| H                     | 3.97870900  | -0.06163000 | -9.32003500  |
| H                     | 3.30641700  | -1.69186400 | -9.38074300  |
| H                     | 2.90093200  | 1.73914700  | -10.77527600 |
| H                     | 1.21153800  | 1.58705300  | -11.22857400 |
| H                     | 1.04604000  | -0.60051900 | -10.06091100 |

  

|    |            |             |              |
|----|------------|-------------|--------------|
| H  | 2.33603800 | -0.59808600 | -11.25043000 |
| O  | 2.24675100 | 0.64546400  | -7.26201800  |
| C  | 2.53371600 | -0.55691900 | -7.79995900  |
| C  | 2.34306800 | -1.54541100 | -7.11383000  |
| Hf | 0.86297100 | -2.14222400 | 0.79013400   |

  

| C <sup>c</sup> -Hf-TSI |             |             |             |
|------------------------|-------------|-------------|-------------|
| C                      | 0.38587900  | -0.11355900 | -1.08162700 |
| C                      | 0.04963100  | 0.23750100  | 0.25252400  |
| H                      | 1.79588900  | -0.25107400 | -1.15963700 |
| C                      | 3.33268300  | -0.01338500 | 0.13006600  |
| H                      | 0.78908800  | -3.51162600 | 2.50470200  |
| H                      | 1.24961700  | 0.29247500  | 1.00592700  |
| C                      | 1.68445100  | -2.44448200 | 2.77578000  |
| H                      | 3.19654300  | -4.35911300 | 1.54327700  |
| C                      | 2.88549000  | -2.64642000 | 1.99364700  |
| C                      | 2.67912100  | -3.83015300 | 1.23702800  |
| Hf                     | 0.97999400  | -2.13413000 | 0.36721000  |
| C                      | -1.23598400 | -2.47202200 | 0.56150800  |
| H                      | -1.70573600 | -2.02277200 | 1.44695200  |
| C                      | 5.25494900  | -2.06423100 | -0.31456200 |
| H                      | -1.45154100 | -3.54901400 | 0.60124600  |
| H                      | 5.26368100  | -0.53718800 | -           |

|   |              |             |             |
|---|--------------|-------------|-------------|
| H | -10.66173500 | -4.72668300 | -5.37511100 |
| C | -9.24254800  | -3.01060500 | -8.09467900 |
| C | -10.54432900 | -3.57423200 | -8.22711200 |
| C | -9.27760000  | -1.68719000 | -8.59937400 |
| H | -8.36713800  | -3.51355500 | -7.70565400 |
| C | -11.38641200 | -2.59578600 | -8.81427300 |
| H | -10.83185700 | -4.58346000 | -9.96287400 |
| C | -10.61346700 | -1.42607900 | -7.90295900 |
| H | -8.46108800  | -0.98860400 | -8.62200500 |
| H | -12.43491200 | -2.71692500 | -9.04831900 |
| H | -10.97646300 | -0.49389100 | -9.44635700 |

C'-HF-TS2

|   |              |             |             |
|---|--------------|-------------|-------------|
| O | -0.68595200  | -0.28845400 | 0.33206200  |
| C | -0.57145900  | 0.03112300  | 1.81762600  |
| O | 0.25867000   | -0.64374200 | -0.09329600 |
| C | -1.45303800  | -1.04063000 | 1.14572500  |
| O | -0.90216600  | 2.13262700  | -0.00154200 |
| C | 0.69163200   | 0.80835200  | 2.21353700  |
| O | -1.47877800  | 0.56366000  | 2.13181900  |
| C | -0.57995800  | -0.92915100 | 2.34836700  |
| O | 0.84252400   | 2.18061000  | 1.54533600  |
| H | 1.57249700   | 1.32435800  | -0.34752200 |
| H | 0.84252400   | 3.06832300  | -0.39963100 |
| H | 1.57397400   | 0.19763900  | 1.97512200  |
| H | 0.69797800   | 0.94256300  | 3.00106500  |
| H | 0.03262000   | 2.85315700  | 1.85707300  |
| H | 1.77362100   | 2.64301200  | 1.88869900  |
| O | -1.15800800  | 0.84286600  | -0.47141100 |
| O | -0.46444900  | 1.94171300  | -0.64958800 |
| C | -0.92919100  | 2.83875800  | -1.35811700 |
| H | -14.55799900 | 1.39595200  | -0.96587400 |
| H | -1.31186300  | 0.34370800  | -0.76632300 |
| H | -12.15637900 | 1.05995500  | -0.12784500 |
| H | -15.05119200 | -0.02431300 | -0.00415600 |
| O | -14.47730600 | -0.21245500 | -1.69992800 |
| H | -11.37026500 | 0.92311400  | -1.83115000 |
| O | -10.33432300 | 1.45301500  | -2.44876400 |
| C | -10.69593600 | 2.06007000  | -3.80089100 |
| O | -9.20258800  | 1.47334900  | -1.97293500 |
| C | -9.52491300  | 2.62174000  | -0.62039700 |
| H | -11.26037400 | 1.30995300  | -4.37062900 |
| H | -11.42213500 | 2.85583200  | -3.58707900 |
| C | -8.78962900  | 1.60921800  | -5.51919900 |
| H | -8.82236700  | 3.11820400  | -3.94059800 |
| H | -9.91919400  | 3.40604800  | -5.27807700 |
| C | -7.98688000  | 0.49707100  | -4.82016200 |
| H | -8.11070800  | 2.16207600  | -6.18067300 |
| H | -9.52433000  | 1.12829600  | -6.17880800 |
| C | -6.83359700  | 0.97815600  | -3.95695900 |
| H | -7.60018500  | -0.19472000 | -5.57935700 |
| H | -8.63432700  | -0.09258900 | -4.16104200 |
| H | -6.28166200  | 0.14719200  | -3.50923100 |
| H | -10.16435000 | 1.64692100  | -3.16273200 |
| O | -5.89777700  | 1.17202000  | -4.82701800 |
| C | -4.79339100  | 2.18563600  | -4.30104100 |
| C | -9.38327000  | 2.94917300  | -5.28251200 |
| O | -4.51301900  | 2.02077500  | -3.10361400 |
| C | -3.71415500  | 4.42677300  | -4.88261900 |
| H | -2.92717800  | 2.43407800  | -5.37574400 |
| C | -4.42412600  | 2.89730300  | -6.22619300 |
| H | -2.72841500  | 2.66498300  | -2.26160000 |
| C | -2.66805100  | 4.69700600  | -3.78839400 |
| H | -4.67540900  | 4.87284600  | -4.95987600 |
| C | -3.39387800  | 4.95713300  | -5.78627700 |
| C | -2.97538800  | 4.13486600  | -2.39027000 |
| H | -2.23467700  | 2.07878800  | -2.98567100 |
| H | -3.11814800  | 2.12890700  | -1.37507100 |
| H | -1.68547500  | 4.32861900  | -4.11513200 |
| H | -2.56438300  | 5.78413300  | -3.69603400 |
| H | -4.01226500  | 4.33618800  | -2.09736600 |
| H | -2.35182700  | 4.64618100  | -1.64880700 |
| H | -10.13008600 | 2.57499200  | 0.35712400  |
| O | -10.97603900 | 2.18415600  | 0.90719800  |
| C | -12.33315000 | 2.56187800  | 0.74223000  |
| C | -10.92641300 | 1.13748300  | 1.86157200  |
| C | -13.12342500 | 1.76626900  | 1.61361200  |
| H | -12.70666500 | 3.31567100  | 0.06800700  |
| H | -10.03065900 | 0.64440700  | 2.21514100  |
| C | -12.25753900 | 0.88058300  | 2.30290000  |
| H | -14.19767900 | 1.82102800  | 1.72417900  |
| H | -12.55173400 | 0.16222600  | 3.05695500  |
| C | -12.22024000 | -2.13420600 | 0.97169400  |
| C | -12.94262400 | -2.27482200 | -0.24165900 |
| H | -10.85765300 | -1.88577100 | 0.64475100  |
| C | -12.63071100 | -2.23412100 | 1.96884800  |
| C | -12.03115200 | -2.10188800 | -1.31552900 |
| H | -14.01206400 | -2.46987600 | -0.33306700 |
| C | -10.74220200 | -1.87346300 | -0.76753500 |
| H | -10.04720300 | -1.75692700 | 1.34967400  |
| H | -12.28057400 | -2.12380600 | -2.36867600 |
| H | -9.83581700  | -1.67823200 | -1.32626900 |

C'-HF-P2

|   |             |             |             |
|---|-------------|-------------|-------------|
| C | 0.18324500  | 0.12398000  | 0.40872800  |
| C | 0.86845900  | 0.34085100  | 1.74817600  |
| H | 0.87668400  | -0.14887700 | -0.39213700 |
| C | -0.60730900 | -0.62291500 | 0.46704000  |
| C | 1.47060000  | 2.68968100  | -0.28128300 |
| C | 2.16956900  | 1.15476000  | 1.68802900  |

|    |              |             |             |
|----|--------------|-------------|-------------|
| H  | 0.14871100   | 0.78803700  | 2.44596600  |
| H  | 1.09025200   | -0.65960300 | 2.14048500  |
| C  | 2.01406400   | 2.58962100  | 1.16955400  |
| H  | 1.99277900   | 1.96796300  | -0.92522100 |
| H  | 1.64138600   | 3.68558100  | -0.69455100 |
| H  | 2.89606900   | 0.62241200  | 1.05854800  |
| H  | 2.60546100   | 1.19205800  | 2.69213400  |
| H  | 1.37528600   | 3.17889300  | 1.83934600  |
| H  | 2.99292000   | 3.07940800  | 1.16851900  |
| O  | -0.56982500  | 1.31870400  | -0.05270400 |
| C  | 0.00103200   | 2.42836700  | -0.37894800 |
| O  | -0.73105400  | 3.38254800  | -0.80153000 |
| H  | -14.26893200 | 1.68086200  | -2.93160500 |
| C  | -14.23786900 | 1.58185200  | -4.02569800 |
| HF | -12.13028300 | 1.13520200  | -4.70468700 |
| H  | -14.98980300 | 0.82834700  | -4.29782300 |
| O  | -14.57650800 | 2.53759900  | -4.44983600 |
| O  | -11.31125500 | 2.84533800  | -3.98460600 |
| H  | -10.34543500 | 3.46447700  | -3.33712100 |
| O  | -10.1074000  | 4.77308000  | -2.70630000 |
| O  | -9.20386000  | 3.03222900  | -3.24484600 |
| H  | -9.72590000  | 5.60011300  | -1.99964800 |
| H  | -11.32013200 | 5.36081200  | -2.25146000 |
| H  | -8.93486500  | 6.57214700  | -2.89631500 |
| H  | -9.04579400  | 4.91887100  | -1.47517900 |
| H  | -10.21517700 | 6.20236000  | -1.22041800 |
| H  | -8.00590800  | 5.95363300  | -3.96519700 |
| H  | -8.33434000  | 7.22617300  | -2.25152700 |
| H  | -9.64788300  | 7.23044200  | -3.41143900 |
| C  | -6.84821200  | 5.13892800  | -3.40126300 |
| H  | -7.60348300  | 6.75745600  | -4.58653700 |
| H  | -8.56703600  | 5.28064700  | -4.62038900 |
| H  | -6.22452800  | 4.72771700  | -4.20079300 |
| H  | -7.19053900  | 4.31215500  | -2.77842300 |
| O  | -6.01638200  | 6.03127000  | -2.59576900 |
| C  | -4.94833500  | 5.49644100  | -2.00780400 |
| C  | -4.16937300  | 6.52791000  | -1.20790000 |
| C  | -4.63727000  | 4.31813200  | -2.10834000 |
| C  | -3.94254500  | 6.16230300  | 0.07862300  |
| H  | -3.20174300  | 6.67747400  | -1.70687700 |
| H  | -4.70513100  | 7.47833700  | -1.26828400 |
| C  | -2.23079600  | 3.26299000  | 0.94748400  |
| H  | -2.75735600  | 5.24302300  | 0.64131400  |
| H  | -4.86711700  | 5.74693400  | 0.70033400  |
| H  | -3.77443700  | 7.10822200  | 0.86071600  |
| C  | -2.90895100  | 3.77427200  | 0.32594500  |
| H  | -2.44009800  | 3.89911000  | -1.80103300 |
| H  | -2.44781000  | 2.22320200  | -1.18933900 |
| H  | -1.83971600  | 5.63436100  | 1.79851100  |
| H  | -2.60540900  | 5.34248700  | -1.72544400 |
| H  | -3.96502300  | 3.47443300  | 0.20308600  |
| H  | -2.57799900  | 3.12902800  | -1.02625000 |
| H  | -9.70052900  | 0.66622100  | -2.70342200 |
| C  | -10.59310000 | 0.05489800  | -3.00956500 |
| C  | -11.82354900 | 0.03388100  | -2.41065000 |
| C  | -10.57716500 | -0.78275400 | -1.15308300 |
| C  | -12.65094500 | -0.84270900 | -3.16350600 |
| H  | -12.12835800 | 0.59673500  | -1.53741600 |
| H  | -9.74729900  | -0.98680100 | -4.81622900 |
| C  | -11.88367300 | -1.34791400 | -4.24180900 |
| H  | -13.68633000 | -1.07477100 | -2.95451100 |
| H  | -12.62242600 | -2.06098800 | -4.98267700 |
| H  | -11.24988400 | 0.62689500  | -7.03881200 |
| C  | -12.61016300 | 0.20312700  | -0.02625900 |
| C  | -11.23239900 | 2.03962800  | -6.92608100 |
| H  | -10.38401300 | -0.01312900 | -7.14453200 |
| C  | -13.42572600 | 1.35656100  | -6.90423900 |
| H  | -12.96176500 | -0.81567200 | -7.12510900 |
| C  | -12.57428000 | 2.48993000  | -6.83105900 |
| H  | -14.30467900 | 2.66210500  | -6.88508500 |
| H  | -10.50604400 | 1.37027500  | -6.86548800 |
| H  | -12.89294700 | 3.51680100  | -6.70628500 |

|   |              |             |              |
|---|--------------|-------------|--------------|
| O | -7.88810800  | 2.81873700  | -6.39961800  |
| H | -9.26317500  | 5.03259200  | -5.10473700  |
| H | -9.91534600  | 5.11797700  | -7.19252600  |
| H | -10.74637900 | 3.92104000  | -6.23936000  |
| C | -8.24793100  | 6.17843300  | -5.28172400  |
| C | -8.86063200  | 4.25733400  | -4.44254400  |
| H | -10.13464700 | 5.45175500  | -4.58951700  |
| H | -6.84014800  | 5.80186400  | -5.77703600  |
| H | -8.14493900  | 6.69894800  | -4.32181000  |
| H | -8.67028000  | 6.91415200  | -5.98011100  |
| C | -6.04510800  | 4.91591900  | -4.83031900  |
| H | -6.27173300  | 6.72317300  | -5.95988500  |
| H | -6.89487700  | 5.27061800  | -6.73350200  |
| H | -5.05395200  | 4.68311100  | -5.23251600  |
| H | -6.55527800  | 3.97506000  | -4.62164000  |
| O | -5.86500800  | 5.65019900  | -3.58132200  |
| O | -5.22496200  | 5.02533300  | -2.59208200  |
| C | -5.08928100  | 5.92021000  | -1.37067500  |
| H | -4.78964200  | 3.88717500  | -2.67508200  |
| O | -5.15079300  | 5.19346000  | -0.01097300  |
| H | -4.14278400  | 6.47316700  | -1.46724600  |
| C | -5.87835700  | 6.67574900  | -1.42452400  |
| C | -2.33309700  | 3.39398900  | -1.16648800  |
| C | -3.85425100  | 4.58645200  | 0.56654000   |
| H | -9.52724100  | 4.41894100  | -0.04711400  |
| C | -3.88764700  | 4.26058800  | 0.27658200   |
| H | -5.91484600  | 4.36467400  | -0.47462300  |
| H | -5.34458800  | 5.81763100  | 0.32163600   |
| C | -3.51688900  | 2.88295400  | -0.31497800  |
| H | -2.74541300  | 3.55612000  | -2.24557300  |
| H | -6.34032000  | 1.88714600  | -1.82018800  |
| H | -2.99639400  | 4.90314700  | 0.31295900   |
| H | -4.17614800  | 4.09748600  | 1.34929700   |
| H | -4.40966300  | 2.40334100  | -0.73015000  |
| H | -3.14551000  | 2.22722500  | 0.48252900   |
| H | -10.72651800 | 2.12981300  | -9.30898500  |
| H | -10.40280300 | 2.05386400  | -10.34015600 |
| H | -10.48480700 | 3.07780500  | -11.31878800 |
| H | -9.78594500  | 0.92537400  | -10.93634800 |
| C | -9.93307600  | 2.57775900  | -12.52695300 |
| H | -10.88041100 | 0.470352700 | -11.16527400 |
| H | -9.59628400  | -0.02460400 | -10.45335700 |
| O | -9.49419200  | 1.24964500  | -12.29205400 |
| H | -9.85523100  | 1.31732800  | -13.46057500 |
| C | -9.04638700  | 0.59014300  | -13.02403700 |
| C | -6.64480000  | 2.74695600  | -10.04811100 |
| C | -6.34486100  | 0.87968900  | -11.43619900 |
| C | -6.09468100  | 1.86458400  | -9.37085000  |
| H | -7.16745500  | -0.07904700 | -9.58399100  |
| C | -5.62424000  | 0.28636100  | -11.61204000 |
| H | -6.59743100  | 0.17059700  | -12.21365000 |
| C | -5.48274600  | 2.70087300  | -10.33817300 |
| H | -6.20971900  | 2.08439300  | -8.31783900  |
| H | -5.25711100  | 1.47819400  | -12.55801200 |
| O | -5.00188800  | 3.65163700  | -10.14524000 |
|   |              |             |              |



|   |             |             |             |   |             |             |             |   |             |             |              |   |             |              |              |
|---|-------------|-------------|-------------|---|-------------|-------------|-------------|---|-------------|-------------|--------------|---|-------------|--------------|--------------|
| H | 5.42358200  | -1.43676800 | -9.88770300 | C | 4.89860800  | -1.99917500 | -6.93357100 | C | 6.09860300  | 0.68146500  | -7.22241600  | H | 2.98464300  | -2.08598600  | -4.67050100  |
| O | 5.33682600  | -1.08329700 | -5.76843000 | O | 4.51913000  | -3.03307000 | -6.27941000 | C | 5.27359100  | 1.05752000  | -8.41479600  | H | 2.63505000  | -4.87935600  | -5.85641100  |
| C | 5.20879000  | -2.11241700 | -6.52507400 | B | 8.28654500  | -0.78600100 | -2.67236500 | C | 6.88502800  | -0.05181500 | -7.28974300  | H | 2.71723700  | -5.92649000  | -4.45189000  |
| O | 4.56087900  | -3.11124900 | -6.05215400 | C | 9.87082000  | -0.29428500 | -2.67414700 | H | 5.89188600  | 1.10191000  | -6.25139000  | H | 4.71838400  | -6.80816900  | -4.44705700  |
| B | 9.50571000  | -1.94728500 | -3.09639100 | C | 10.89356800 | -1.23336700 | -2.49555700 | C | 5.10321700  | -2.27830400 | -8.48932000  | H | 3.76163200  | -3.97934500  | -3.14236500  |
| C | 9.49051400  | -0.66158200 | -4.12419600 | C | 10.33595200 | 0.99266500  | -2.93383200 | C | 5.37172700  | 0.09075300  | -9.60657400  | O | 1.75665800  | -2.42054600  | -2.28168800  |
| H | 9.08051000  | 0.19477700  | -3.64686800 | C | 12.25183700 | -0.94213300 | -2.56653500 | H | 4.23369100  | 1.17791000  | -8.08945400  | C | 1.36505900  | -3.50984300  | -1.89570300  |
| C | 10.46992000 | -0.87375400 | -5.04642200 | C | 11.68432200 | 1.33720300  | -3.02783900 | H | 5.60927400  | 2.05162100  | -8.72992500  | C | 2.19498200  | -6.30608000  | -0.61579400  |
| H | 8.48805800  | -0.33128200 | -4.41052600 | C | 12.65527400 | 0.36292100  | -2.83975800 | C | 4.58383400  | -1.22659500 | -9.49077900  | H | 0.25748200  | -0.82022800  | -4.12246000  |
| C | 11.10769200 | -2.16355900 | -2.73703200 | C | 8.21700300  | -1.84153400 | -3.97414500 | H | 6.42944700  | -0.12531900 | -9.81006100  | H | 0.88376600  | -6.40024000  | 2.09652400   |
| C | 11.91997000 | -3.19009000 | -3.22203200 | C | 8.08452400  | -3.23513800 | -3.92960100 | H | 4.67951200  | -3.26040200 | -8.71546300  | H | 0.01846400  | -5.36811000  | 3.51684700   |
| C | 11.81144400 | -1.18155500 | -2.02921900 | C | 8.33192500  | -1.34289900 | -5.27659900 | H | 6.42944700  | -0.12531900 | -9.81006100  | H | 0.88376600  | -6.40024000  | 2.09652400   |
| C | 13.29762400 | -3.26594300 | -3.00953400 | C | 7.97364100  | -0.40505900 | -5.05869500 | H | 4.99500800  | 0.61863600  | -10.49112700 | H | 3.36304600  | -5.57622400  | 0.73625400   |
| C | 13.80602000 | -1.21238600 | -1.78750000 | C | 8.25916100  | -2.12084000 | -6.42918200 | C | 3.52986200  | -1.00564800 | -9.27479800  | H | 4.03171500  | -3.87827400  | 2.69200200   |
| C | 13.93644700 | -2.27036500 | -2.28320100 | C | 8.05105900  | -3.49057100 | -6.32724300 | H | 4.59600800  | -1.70281700 | -10.47829600 | H | 1.96013400  | -3.74123200  | 4.42588900   |
| C | 8.81286300  | -3.33533500 | -3.70973800 | C | 7.83559900  | -1.48374300 | -2.13361200 | O | 4.88969000  | -0.85199200 | -6.52207200  | H | 1.30198100  | -1.26390000  | 3.79466600   |
| C | 8.73902800  | -4.48545300 | -2.91124400 | C | 6.62077600  | -2.16417800 | -1.11796200 | C | 4.79949200  | -1.97426900 | -7.04134200  | C | 6.17922000  | 2.00367300   | -6.81863200  |
| C | 8.18425000  | -3.48042400 | -4.94159400 | C | 8.48791500  | -1.31185900 | -0.00853400 | O | 4.42973800  | -3.03214400 | -6.35521100  | C | 5.48255400  | 1.59148600   | -8.09527600  |
| C | 8.08589100  | -5.66044500 | -3.27240600 | C | 6.10623600  | -2.67434200 | 0.06558700  | B | 8.32557700  | -0.92067700 | -2.69118900  | H | 6.14162200  | -1.21959700  | -6.06185000  |
| C | 7.53134300  | -6.43297200 | -5.36046200 | F | 7.99968900  | -1.78032900 | 1.21479100  | C | 9.95229700  | -0.47530700 | -2.74027300  | H | 5.81956900  | 2.94883000   | -6.41166100  |
| C | 7.46367100  | -5.73642200 | -4.51546000 | C | 6.79357800  | -2.46621200 | -2.12546100 | C | 10.95415200 | -1.40375300 | -2.43095100  | C | 4.75986000  | -1.93214400  | -8.34270000  |
| C | 5.95377000  | -1.61635900 | -1.76679800 | F | 13.95768700 | 0.66954200  | -2.92402800 | C | 10.44997500 | 0.73803000  | -3.20555600  | C | 6.03352000  | 0.29222600   | -8.73052100  |
| C | 7.20220700  | -1.25189200 | -1.94968400 | F | 12.04490200 | 2.60517700  | -3.38014500 | C | 12.31877700 | -1.15938900 | -2.55009300  | H | 4.44256600  | 1.44024400   | -7.79119500  |
| C | 8.90396400  | -1.72007400 | -0.41837700 | F | 9.47731900  | 2.03018900  | -3.13600600 | H | 11.80393500 | 1.03240200  | -3.35835800  | H | 5.49681400  | 0.24216200   | -8.81318600  |
| C | 6.30738900  | -0.96169400 | -0.92390600 | F | 10.57147100 | -2.51987800 | -2.23274900 | C | 12.75302500 | 0.07664900  | -3.02454400  | C | 4.93726800  | -6.68401000  | -9.22417000  |
| C | 8.05208400  | -1.42218600 | 0.64729900  | F | 13.17552400 | -1.89859100 | -2.38090000 | C | 8.24807800  | -2.02746200 | -3.94320400  | H | 5.69914300  | -2.50079200  | -8.30264100  |
| C | 6.74515800  | -1.03016200 | 0.39130700  | F | 8.51866100  | -0.01736400 | -5.50372600 | C | 8.07903700  | -3.41376500 | -3.83987600  | H | 4.01677300  | -2.61346600  | -8.77619900  |
| F | 15.25999900 | -2.32257200 | -2.06820200 | F | 8.32907400  | -1.54436500 | -7.65519600 | C | 8.36644700  | -1.58704400 | -5.26493700  | H | 6.68057600  | -0.22378200  | -8.01350600  |
| F | 13.77988200 | -0.23295700 | -1.08869500 | F | 7.90726800  | -4.24132200 | -7.43264600 | C | 7.92372800  | -4.26979800 | -4.93419700  | H | 6.68637200  | 0.56183200   | -9.56876100  |
| F | 11.15233800 | -0.11107400 | -1.52495300 | F | 7.74897400  | -5.37029100 | -4.92774000 | C | 8.25817200  | -2.40644800 | -6.38327400  | H | 3.97847700  | -1.06357000  | -9.31878700  |
| F | 11.40252800 | -4.19749700 | -3.96978300 | F | 8.00815700  | -3.89405200 | -2.75832500 | C | 8.00489300  | -3.76344200 | -6.22511200  | H | 5.18903500  | -1.04291000  | -10.20358400 |
| F | 14.01042300 | -4.29053300 | -3.50952100 | F | 5.83536000  | -2.36542300 | -2.21451800 | F | 7.88742500  | -1.53803700 | -1.22357500  | O | 4.17777000  | -0.53335000  | -6.43324100  |
| F | 8.14091900  | -2.45592500 | -5.85235500 | F | 4.92856700  | -3.34036800 | 0.07402200  | C | 6.65642600  | -2.18677100 | -1.08626100  | C | 3.44780000  | -1.64338000  | -6.90757400  |
| F | 6.92857100  | -4.68924800 | -4.57347600 | F | 6.28156700  | -2.90026200 | 2.24327100  | C | 6.13404800  | -1.31317200 | -0.00530700  | O | 4.20971200  | -2.77997800  | -6.21600800  |
| F | 6.77974500  | -6.83395500 | -4.88120600 | F | 8.67828900  | -1.55937600 | 2.35909700  | C | 8.52706300  | -2.62485500 | 0.11982400   | H | 8.08894800  | -0.83201200  | -2.54751800  |
| F | 8.03443500  | -6.71024400 | -2.43895400 | F | 9.65377200  | -0.63743300 | 0.07164500  | C | 8.03047300  | -1.70862100 | 1.23700400   | C | 6.95104300  | 0.131436600  | -0.30723700  |
| F | 9.92015500  | -4.48700000 | -1.69633200 | F | 7.39488200  | 0.40363700  | -4.82371700 | C | 6.81101300  | -2.36869600 | 1.30137800   | H | 6.98406400  | 1.12013400   | -3.25270200  |
| F | 6.66134100  | -1.19785000 | -3.20648500 | C | 8.24574700  | 5.29948700  | -4.93764700 | F | 14.06191800 | 0.33409300  | -3.16118100  | H | 7.03382800  | 0.78364000   | -0.45386000  |
| F | 5.02331500  | -0.63628600 | -1.11600800 | H | 7.86971900  | 3.28592100  | -4.18708400 | F | 12.18617500 | 2.23153800  | -3.84470600  | H | 5.94734100  | -0.12538500  | -3.00119100  |
| F | 5.90127500  | -0.75040200 | 1.40948800  | H | 6.41874000  | 4.27520000  | -4.39547600 | F | 9.61529000  | 1.75371400  | -3.57821000  | C | 9.65690400  | -0.26689500  | -2.77113500  |
| F | 8.47631100  | -1.52542600 | 1.91527400  | F | 9.42386600  | 2.87602400  | -6.53851000 | F | 10.64420000 | -2.63044000 | -1.98914400  | C | 7.101881700 | -1.03443000  | -2.27131800  |
| F | 10.12613500 | -2.14574000 | -0.05625100 | F | 9.73993900  | 5.04339500  | -5.17658400 | F | 13.22078800 | -2.09904600 | -2.22599300  | C | 10.07488800 | 0.92018300   | -3.36032000  |
|   |             |             |             | H | 7.82563300  | 5.93459600  | -5.72983600 | F | 8.62087000  | -0.27607300 | -5.54632500  | C | 12.05862700 | -0.56569100  | -3.22693000  |
|   |             |             |             | H | 8.12543000  | 5.85349200  | -3.99714300 | F | 8.32072600  | -1.87761200 | -7.63285600  | C | 11.39829500 | 1.34657100   | -3.34508300  |
|   |             |             |             | C | 10.05032300 | 4.28650800  | -6.47363200 | F | 7.83938000  | -4.55393800 | -7.29658600  | C | 12.10193100 | 0.55420400   | -2.91595800  |
|   |             |             |             | H | 9.55855300  | 2.37260100  | -5.57432700 | F | 7.68020200  | -5.57668100 | -4.74906200  | C | 8.11585500  | -2.04030000  | -3.89956900  |
|   |             |             |             | C | 9.92326600  | 2.27146900  | -7.29858600 | F | 8.02286500  | -4.02224100 | -2.64118200  | C | 8.23469000  | -3.41137500  | -3.63632500  |
|   |             |             |             | H | 10.14549800 | 4.46810700  | -4.33338000 | F | 5.87561200  | -2.42034400 | -2.17510400  | C | 8.09977500  | -1.74120500  | -5.26544300  |
|   |             |             |             | H | 10.27016100 | 6.00404900  | -5.18561900 | F | 6.90558800  | -3.26468100 | 0.15741400   | C | 8.27362500  | -4.39970500  | -4.62099900  |
|   |             |             |             | H | 9.73437300  | 4.87304800  | -7.34739000 | F | 4.28043900  | -2.72955500 | 2.48740600   | C | 13.55549000 | -2.969134300 | -6.28224000  |
|   |             |             |             | H | 11.13686800 | 4.16792700  | -6.55794500 | F | 8.70502700  | -1.44017500 | 2.36637200   | C | 8.21442400  | -4.00027600  | -5.26190000  |
|   |             |             |             | C | 7.04491100  | 3.43751800  | -6.09884900 | F | 9.71098900  | -0.65209700 | 0.04547900   | C | 7.62819400  | -1.353700800 | -1.94168200  |
|   |             |             |             | C | 7.95395500  | 2.84778300  | -6.90910900 | C | 7.37264300  | 3.88543400  | -4.46154700  | C | 6.49573000  | -2.16174300  | -1.08573200  |
|   |             |             |             | C | 7.53854300  | 2.30975200  | -7.91969900 | C | 6.79804000  | 5.31129800  | -4.80440000  | C | 8.14725300  | -0.881490800 | -0.03564000  |
|   |             |             |             | F | 7.18710200  | 0.42469400  | -2.87711800 | H | 8.16993900  | 3.37933700  | -3.89165300  | C | 5.94016500  | -2.50298300  | 0.14315500   |
|   |             |             |             | H | 6.16730000  | 0.01799600  | -2.86308000 | H | 6.44606700  | 3.77425600  | -3.89286100  | C | 7.62138200  | -1.18991000  | 1.22115500   |
|   |             |             |             | H | 7.24426100  | 1.15311300  | -2.05853300 | C | 9.39972500  | 3.27908500  | -6.49411300  | C | 6.50413200  | -0.00577900  | 1.31148900   |
|   |             |             |             | H | 7.30114500  | 0.98199500  | -3.81073400 | C | 9.10892000  | 5.56136500  | -5.30531200  | F | 13.69156000 | 9.40221000   | -2.98560700  |
|   |             |             |             |   |             |             |             | H | 6.93996300  | 5.66775800  | -5.53395300  | H | 11.69712500 | 2.53061600   | -4.03883800  |
|   |             |             |             |   |             |             |             | H | 7.51577800  | 5.89350700  | -3.88834600  | F | 9.17845300  | 1.78709700   | -3.92848000  |
|   |             |             |             |   |             |             |             | C | 9.47319400  | 4.81918100  | -6.59684300  | F | 10.46420300 | -2.22299700  | -1.69565400  |
|   |             |             |             |   |             |             |             | H | 9.87548300  | 2.93336800  | -5.56708100  | F | 13.01653700 | -1.44486700  | -1.81396400  |
|   |             |             |             |   |             |             |             | H | 9.93263700  | 2.81567900  | -7.32693300  | F | 8.06659000  | -0.44607900  | -5.69934500  |
|   |             |             |             |   |             |             |             | C | 8.01815200  | 5.27076800  | -4.51742000  | F | 8.08182200  | -1.31540900  | -7.58092700  |
|   |             |             |             |   |             |             |             | H | 9.24696800  | 6.63780800  | -5.46400700  | F | 8.24353900  | -4.96985000  | -6.92        |

|   |             |              |              |    |             |             |             |   |              |             |              |   |             |             |             |
|---|-------------|--------------|--------------|----|-------------|-------------|-------------|---|--------------|-------------|--------------|---|-------------|-------------|-------------|
| C | -0.37728600 | -3.14590300  | 2.00744300   | O  | 7.52397000  | 2.75326700  | -7.70483900 | C | 6.22777300   | -0.48072700 | 0.59846700   | C | 5.66973000  | 0.65687800  | -7.93067500 |
| H | -0.74894500 | -2.81496700  | 2.98758700   | C  | 8.11513000  | 3.93604800  | -0.77891600 | F | 14.19811200  | 1.04277800  | -3.09365500  | H | 4.59676500  | 2.35738600  | -8.73223600 |
| H | -0.99290800 | -2.64529100  | 1.24635300   | C  | 8.25588000  | 4.46835200  | 0.64512000  | F | 12.72442400  | 1.49583600  | -5.37170700  | C | 6.02949000  | 1.92895900  | -9.66201300 |
| H | -0.57839800 | -4.22397600  | 1.93450400   | H  | 8.42786900  | 2.89065400  | -0.85100100 | F | 10.14295200  | 0.91728500  | -5.45291100  | C | 4.73335300  | -0.36461600 | -8.59386100 |
| H | 3.27704900  | -0.73857800  | -0.34094900  | H  | 7.07841900  | 4.00656600  | -1.11486200 | H | 10.38453300  | -0.61763200 | -0.93626800  | H | 5.68125900  | -2.16656200 | -7.79543700 |
| C | 1.41103800  | -4.59391500  | -2.32114600  | C  | 11.00468400 | 4.00031200  | -0.80523400 | F | 12.95752100  | -0.02218600 | -0.89429600  | H | 4.08531300  | -2.43652300 | -8.45629200 |
| C | 1.59959800  | -4.51096600  | -3.84385400  | C  | 9.56000600  | 4.06099600  | 1.34308900  | F | 7.27190800   | -0.78448600 | -6.13696300  | H | 5.35902900  | 0.79270100  | -6.88803900 |
| H | 1.95682600  | -5.44563500  | -1.89538500  | H  | 8.14427200  | 5.56100000  | 0.62098700  | F | 7.53459200   | -3.02578700 | -7.52031000  | H | 6.69579000  | 0.27242800  | -7.91246400 |
| C | 0.35467200  | -4.77780700  | -2.07802700  | H  | 7.40729200  | 4.07994900  | 1.22388400  | F | 8.82927400   | -5.19475200 | -6.46975900  | H | 3.71811200  | 0.04971200  | -8.62930400 |
| C | 4.09685300  | -2.54188300  | -4.58935900  | C  | 10.83557600 | 4.53558500  | 0.63467800  | F | 9.88276800   | -0.53680300 | -3.94453200  | H | 5.04686200  | -0.53267500 | -9.33020800 |
| C | 3.01224800  | -4.86719700  | -4.34724100  | H  | 10.76513900 | 2.92985000  | -0.83102500 | F | 9.65114500   | -2.78113200 | -2.52196900  | O | 3.45783100  | -0.66910000 | -6.06117900 |
| H | 1.31106900  | -3.50834500  | -4.17904500  | H  | 12.04184000 | 4.11140900  | -1.12926800 | F | 6.58912200   | -2.51323200 | -2.34989200  | C | 4.06284200  | -1.63201200 | -6.49038600 |
| C | 0.89517000  | -5.20943700  | -4.31366000  | H  | 9.58200100  | 2.96662900  | 1.42850000  | F | 5.22909200   | -2.51304000 | -0.80864300  | O | 4.25718800  | -2.76470700 | -5.78980800 |
| C | 4.14818800  | -3.91482500  | -3.93632900  | H  | 9.55488900  | 4.45318300  | 2.36785600  | F | 7.25801600   | 1.58411400  | 1.17863700   | C | 6.59818500  | 0.03988500  | -3.17205200 |
| H | 4.83495600  | -1.87034100  | -4.14520100  | H  | 10.88020600 | 5.63331200  | 0.62348400  | F | 8.63937400   | 1.60109200  | -1.08407400  | H | 7.81377100  | 2.20655100  | -3.10715100 |
| H | 3.26082800  | -5.87796600  | -3.99356300  | O  | 10.88310780 | 4.72041700  | -1.76803600 | C | 9.63236000   | 4.25563000  | -4.95851300  | H | 8.03110200  | 1.64141000  | -4.76127500 |
| H | 5.11342700  | -4.37384500  | -4.18493100  | O  | 10.18232000 | 4.72640900  | -1.85356300 | C | 10.16773210  | 5.20797300  | -5.57197200  | H | 6.67977200  | 1.05554900  | -3.79923100 |
| H | 4.15627000  | -3.75780500  | -2.85303000  | O  | 10.68566600 | 5.32924900  | -2.78337000 | H | 9.74776200   | 3.18519700  | -5.02736200  | C | 10.24918600 | 0.24629700  | -3.09112800 |
| O | 2.04244300  | -2.26825400  | -2.06738900  |    |             |             |             | H | 8.75120500   | 4.62121600  | -4.45548700  | H | 11.07258400 | -0.78139100 | -2.61136500 |
| C | 1.80073800  | -3.34205400  | -1.54043300  |    |             |             |             | C | 10.06855200  | 3.02701000  | -7.97711800  | C | 10.95830800 | 1.37431000  | -4.34866800 |
| O | 1.82631400  | -3.54912700  | -0.32292400  |    |             |             |             | H | 11.63174700  | 4.56926600  | -6.53438800  | C | 12.46238200 | -0.17173100 | -2.54142300 |
| H | 0.62051200  | -0.507707100 | -0.37761800  |    |             |             |             | H | 10.05282800  | 6.00914700  | -0.66376000  | C | 12.34443900 | 1.50588500  | -3.42224200 |
| H | -0.24701700 | -0.32227800  | 2.17021200   |    |             |             |             | H | 11.15785000  | 5.68264000  | -4.74609700  | C | 13.11199900 | 4.05254400  | -2.94691000 |
| H | 0.94422100  | -4.56923200  | 1.12865300   |    |             |             |             | H | 10.36631400  | 2.22200300  | -7.29407900  | C | 8.38857700  | -1.27219000 | -4.17621000 |
| H | 1.78454800  | -5.91737900  | 4.19652100   |    |             |             |             | H | 10.02563200  | 2.59792800  | -8.98109700  | C | 8.09674100  | -2.58232700 | -3.77677200 |
| H | 4.14603300  | -4.84744400  | 1.19337200   |    |             |             |             | H | 12.0840100   | 3.69388400  | -6.05380300  | C | 8.50422800  | -1.12417300 | -5.56083700 |
| H | 4.76413700  | -2.88531100  | 2.87331200   |    |             |             |             | H | 12.44427900  | 5.29029000  | -6.68496700  | C | 7.84983900  | -3.63018900 | -4.66194600 |
| H | 2.77969800  | -2.68659200  | 4.70081500   |    |             |             |             | H | 10.69872700  | 5.05899500  | -8.43531400  | C | 8.26013700  | -2.14400500 | -6.48079100 |
| H | 1.90670900  | -0.34562500  | 3.77995200   |    |             |             |             | H | 11.96383100  | 3.84868500  | -8.52158400  | C | 7.90990300  | -3.40612700 | -6.03095300 |
| C | 6.16158200  | 2.51789500   | -7.13424400  |    |             |             |             | H | 8.38697900   | 4.11629300  | -6.58959100  | C | 7.96017800  | -0.14956300 | -1.64389900 |
| C | 5.36115100  | 1.70184800   | -8.12411900  | HF | 1.65494900  | -3.44452500 | 1.93312800  | C | 8.67431000   | 3.46442000  | -7.60471500  | C | 6.69167200  | 0.20728600  | -1.44046900 |
| H | 6.32158300  | 1.98811300   | -6.19243300  | O  | -0.17234200 | -4.75023300 | 2.32897000  | C | 7.75907600   | 3.11349300  | -8.48674300  | C | 8.49574700  | 0.41173600  | -0.48518500 |
| H | 7.72794200  | 3.50045100   | -6.93594300  | H  | -0.02636600 | -5.60559900 | 2.99768700  | C | 7.97277200   | 4.66416100  | -0.84091600  | C | 6.05082100  | 0.77358100  | -2.08055000 |
| H | 4.87464700  | -1.91506100  | -8.17612600  | H  | -1.07918900 | -4.23130800 | 2.65879700  | C | 8.45121200   | 5.76969900  | 0.09297600   | C | 7.88856600  | 0.04033800  | -6.79826000 |
| C | 6.01631100  | 0.37080700   | -8.53626900  | H  | -0.39925600 | -5.17255500 | 1.35343700  | H | 7.94879900   | 3.68445400  | -0.36005700  | C | 6.64992400  | -0.21419700 | 0.91490700  |
| H | 4.42092600  | 1.48215100   | -7.06627900  | H  | 1.23627700  | -1.00865800 | -0.05265000 | H | 6.97742400   | 4.88314300  | -1.22939900  | F | 14.44551000 | 0.55522800  | -2.87355700 |
| H | 5.12039900  | 2.30913100   | -9.602639100 | H  | 1.42308300  | -4.70200900 | -2.23361000 | C | 10.767978100 | 3.83287500  | -0.80155100  | C | 12.94132500 | 2.66861700  | -3.77408900 |
| C | 4.99121800  | -0.66905100  | -9.06308900  | H  | 1.58436100  | -4.43963200 | -3.73898000 | C | 9.67709900   | 5.40440900  | 0.94902000   | F | 10.30423400 | 4.93157800  | -3.93888100 |
| H | 5.81941000  | -2.42356500  | -8.11043600  | C  | 2.00702900  | -5.57522000 | -1.91480800 | H | 8.63875500   | 6.67583500  | -0.49889000  | C | 8.86921300  | 0.06281600  | -6.10967200 |
| H | 4.18333100  | -2.64591300  | -8.61647600  | C  | 3.07895300  | -4.95528000 | -2.00071000 | H | 7.61297900   | 6.00488600  | 0.76102500   | F | 13.17987900 | -1.74013200 | -2.06872200 |
| H | 6.55431200  | -0.04848100  | -7.67948800  | C  | 3.99057800  | -2.31603300 | -4.31307000 | C | 10.93722000  | 5.05253400  | -0.13412500  | F | 8.86921300  | 0.06281600  | -6.10967200 |
| H | 7.77999200  | 0.56624100   | -9.29820200  | C  | 2.99605800  | -4.69209700 | 4.30364900  | H | 10.25359200  | 3.01764600  | -0.28174200  | F | 8.71307400  | -1.89433400 | -7.80474600 |
| H | 4.00922100  | -0.20283200  | -9.16158600  | H  | 1.25960000  | -3.41561800 | -3.95509000 | H | 11.74536400  | 3.45429500  | -1.11285600  | F | 7.64422000  | -3.38508300 | -6.90314700 |
| H | 5.27551100  | -1.00997900  | -10.06825100 | H  | 0.89188700  | -5.10256700 | -4.27376300 | H | 9.41958800   | 4.55279200  | 1.58600500   | F | 7.51704400  | -4.84967900 | -4.20109100 |
| O | 4.03812400  | -0.51853100  | -6.36634700  | C  | 4.11268100  | -3.75063200 | -3.82148100 | H | 9.90823700   | 6.24112400  | 1.61122000   | F | 8.10988100  | -2.91208800 | -2.46959500 |
| C | 4.39771400  | -1.61277600  | -6.76377500  | H  | 7.473780100 | -1.67692100 | -3.83752700 | H | 11.27046000  | 5.92123500  | -0.44788600  | F | 5.99619500  | -1.20403500 | -2.48225400 |
| O | 4.43367400  | -2.71122700  | -5.99810700  | H  | 3.00619600  | -1.86926600 | -4.11888800 | H | 11.76639200  | 4.81758600  | 0.83043800   | F | 4.84555200  | -1.36157000 | -0.09045400 |
| B | 8.40663700  | -0.50312000  | -3.15087400  | H  | 2.94788200  | -4.63767900 | -5.39901900 | C | 8.74835200   | 4.56320600  | -2.06533000  | F | 6.03019200  | -0.25603000 | -2.11028200 |
| C | 7.27544300  | 0.53989800   | -3.62852500  | H  | 3.28424700  | -5.72601500 | -4.06448100 | C | 10.02057300  | 4.13518600  | -2.07673300  | F | 8.47456400  | 1.00524300  | 1.82131200  |
| H | 7.33799900  | 1.48928400   | -3.07665800  | H  | 5.038209500 | -4.14238400 | -4.15379100 | O | 10.58949800  | 4.02539300  | -3.172077000 | F | 9.68262300  | 1.09849300  | -0.51871400 |
| H | 7.29395300  | 0.78020700   | -4.69229300  | H  | 4.15610300  | -3.71663600 | -2.72813300 |   |              |             |              | C | 9.85678700  | 5.65419400  | -4.54080500 |
| H | 6.28546600  | 0.11879800   | -3.41164900  | O  | 2.03542600  | -2.41198500 | -1.17911600 |   |              |             |              | C | 10.97937900 | 6.07537000  | -5.65040700 |
| C | 10.00404000 | 0.09774200   | -3.33674800  | C  | 1.77903600  | -3.53527000 | -1.31728700 |   |              |             |              | C | 10.06026800 | 3.14781300  | -7.32285700 |
| C | 11.10188700 | -0.50002500  | -2.70366800  | C  | 1.17588300  | -3.87084700 | -0.03102500 |   |              |             |              | H | 11.68052400 | 4.95748400  | -6.25221700 |
| C | 10.36483000 | 1.13357300   | -4.19384300  | H  | -1.02661900 | -1.90107100 | 1.10567200  |   |              |             |              | H | 10.16350300 | 6.51705900  | -6.42598100 |
| C | 12.42430000 | -0.09321200  | -2.86265800  | H  | -0.59999000 | -2.04564400 | 3.76106700  |   |              |             |              | H | 11.43456000 | 6.88057900  | -5.62202600 |
| C | 11.66998600 | 1.58238000   | -4.38584000  | H  | 1.92862800  | -5.53795400 | 4.38972300  |   |              |             |              | H | 11.52394000 | 4.22351800  | -6.50371700 |
| C | 12.71804000 | 0.96680400   | -3.71749300  | H  | 2.65529400  | -6.49480400 | 1.97943800  |   |              |             |              | H | 10.19013200 | 2.61875800  | -6.36957000 |
| C | 8.48526400  | -1.89657600  | -4.06702000  | H  | 4.37176800  | -4.73621600 | 0.87516200  |   |              |             |              | H | 11.49009200 | 2.38232000  | -8.09934100 |
| C | 8.67734400  | -3.19220300  | -3.57126900  | H  | 4.68028600  | -2.68933100 | 2.57215900  |   |              |             |              | H | 11.18390700 | 4.22490000  | -5.84782700 |
| C | 8.38222000  | -1.85026000  | -5.46078600  | H  | 3.18711600  | -3.19900500 | 4.77084400  |   |              |             |              | H | 12.63001700 | 5.42362800  | -6.54282100 |
| C | 8.69576000  | -4.34057700  | -4.36326100  | H  | 1.90909700  | -1.21413800 | 4.24395000  |   |              |             |              | H | 8.102091800 | 4.96129500  | -5.24599900 |
| C | 8.38364600  | -2.96702100  | -6.29196300  | C  | 6.35864100  | 3.47250700  | -8.23984800 |   |              |             |              | H | 12.01634800 | 3.71571500  | -7.94945500 |
| C | 6.97867800  | -4.23217900  | -5.74017000  | C  | 5.46535600  | 2.40628500  | -8.85024500 |   |              |             |              | C | 8.27771700  | 4.76615000  | -6.93988000 |
| C | 8.06107900  | -0.77115900  | -1.5         |    |             |             |             |   |              |             |              |   |             |             |             |

|   |             |             |             |   |             |             |               |   |             |             |             |   |             |             |              |
|---|-------------|-------------|-------------|---|-------------|-------------|---------------|---|-------------|-------------|-------------|---|-------------|-------------|--------------|
| C | 0.53029600  | -4.32843000 | 0.95935600  | C | 2.16203200  | -5.04673900 | -4.65814300   | H | -0.20970500 | -4.47422300 | -2.69105600 | H | 2.65092100  | -0.45366900 | -1.22827600  |
| C | 0.48653400  | -4.40528300 | 2.05445300  | H | 3.27871500  | -3.18246400 | -4.43469600   | C | 3.56889900  | -2.97940300 | -4.60853800 | C | 0.38364500  | -3.99767200 | -3.32239600  |
| H | -0.49374400 | -4.12344700 | 0.61663600  | H | 1.71626500  | -2.97754400 | -5.24072000   | C | 2.10445600  | -5.02358600 | -5.27237500 | C | 0.84549400  | -4.04606700 | -4.78657000  |
| H | 0.81390600  | -5.32182600 | 0.58401300  | H | 0.77428800  | -5.55372900 | -6.22821500   | H | 0.67387000  | -3.42321300 | -4.89884800 | C | 0.50158800  | -4.96761300 | -2.82611600  |
| H | 0.99065000  | -0.29954000 | -1.63874700 | H | 0.63941600  | -6.58221300 | -4.80100200   | H | -0.02617300 | -5.02033400 | -4.98388500 | H | -0.69228000 | -3.77645000 | -3.27906900  |
| C | 0.82304500  | -4.19930400 | -3.91104300 | H | 2.92029000  | -5.32519100 | -5.39509900   | C | 3.42355000  | -4.47129200 | -4.71547300 | C | 3.88018600  | -2.94844300 | -4.64546400  |
| C | -0.04324900 | -3.75108200 | -5.10018600 | H | 2.46225500  | -5.52367200 | -3.71469900   | C | 4.69747200  | -2.47440400 | -4.14006400 | C | 2.14849800  | -4.83056000 | -5.03587300  |
| H | 1.65884100  | -4.82908600 | -4.24965500 | O | 1.74463000  | -3.09625200 | -3.14197400   | H | 2.29049000  | -2.35327900 | -5.01327800 | H | 0.93118700  | -3.01757600 | -5.53538800  |
| C | 0.25022900  | -4.80983400 | -3.20717100 | C | 0.64733200  | -3.47266800 | -2.57053200   | H | 2.05413000  | -4.81203100 | -6.34735000 | H | 0.05914600  | -4.52227300 | -5.38625100  |
| H | 1.75377900  | -1.41861400 | -4.91691700 | O | 0.43372400  | -3.03019000 | -1.41022800   | H | 2.12059400  | -6.11610700 | -5.17178500 | C | 3.40673000  | -4.34547000 | -4.29374600  |
| C | 0.77013200  | -3.33013400 | -6.33440700 | H | -0.60108300 | 0.04224700  | -1.44538000   | H | 4.26431300  | -4.78359200 | -5.34186600 | H | 4.69858800  | -2.60382700 | -4.01090500  |
| H | -0.70494800 | -2.93548800 | -4.77955000 | H | -0.75035500 | 0.53504400  | 1.19322600    | H | 3.63943000  | -4.87707700 | -3.72047500 | H | 3.08271900  | -2.06859000 | -4.648185400 |
| C | -0.70599800 | -4.58192000 | -5.56412100 | H | 0.54573400  | -3.54606500 | 3.22245900    | O | 2.52745400  | -2.80681800 | -2.81462100 | H | 2.35347000  | -4.83833000 | -6.11480500  |
| C | 1.19124400  | -2.45669000 | -2.22572800 | H | 0.62376300  | -5.20052700 | 1.10711400    | C | 1.62563400  | -3.51116000 | -2.31190400 | H | 1.95982500  | -5.87969200 | -4.75536400  |
| H | 2.55376600  | -0.68314900 | -4.86613000 | H | 2.80752700  | -4.58015800 | -0.35445800   | O | 1.31615600  | -3.40627700 | -1.06270200 | H | 4.23246400  | -5.04350800 | -4.47703200  |
| H | 0.79073100  | -0.90904000 | -5.01422300 | H | 4.05698900  | -2.53112600 | 0.84265500    | H | -0.37736300 | -0.55621200 | -1.10750300 | H | 3.23787300  | -3.47153000 | -3.21014500  |
| H | 0.10558700  | -2.79793500 | -7.02573100 | H | 2.67012100  | -1.89501100 | 3.06631000    | H | -0.82197100 | -0.23391800 | 1.52406500  | O | 1.59154000  | -1.93317200 | -2.97505600  |
| H | 1.20594000  | -4.22272300 | -6.86533900 | H | 1.74200300  | 0.43198400  | 2.20210000    | H | 0.71818000  | -4.33806700 | 3.34839700  | C | 1.06575800  | -2.92160400 | -2.47715400  |
| H | 2.30685800  | -1.90405800 | -6.88109000 | C | 3.95979400  | -0.96222900 | -0.803830700  | H | 1.62957900  | -5.66550800 | 1.19832100  | O | 1.01882600  | -3.16468200 | -1.18089300  |
| H | 1.85819800  | -3.06463600 | -5.72517900 | C | 3.59579400  | -0.45208900 | -9.46303700   | H | 3.85553300  | -4.41570800 | 0.32824400  | H | 0.00852900  | -0.07256900 | -1.06355500  |
| O | 2.79068000  | -1.92976500 | -3.52517400 | H | 4.80172200  | -1.36585400 | -7.88584900   | H | 4.30644300  | -2.30974300 | 1.92752700  | H | -0.65792500 | 0.07013800  | 1.54694000   |
| C | 1.42547300  | -3.09424500 | -3.08112700 | H | 3.65158500  | -0.15194000 | -7.23092900   | H | 2.36405500  | -2.25682400 | 3.80191500  | O | 0.29993900  | -4.22096600 | 3.21663800   |
| O | 1.06125600  | -3.30094900 | -1.85395700 | C | 3.72877600  | -3.59243400 | -9.24488400   | H | 6.16333200  | 0.01482500  | 2.74669200  | H | 0.71656400  | -5.62242900 | 1.07468700   |
| H | -1.00029000 | -1.61488600 | -0.36558800 | C | 4.10357700  | -1.39663500 | -10.56128100  | H | 6.11680600  | 0.25381500  | -5.87198400 | H | 3.10420400  | -4.89799500 | 0.01578800   |
| H | 0.31392600  | -1.84192500 | 2.22208400  | H | 2.52961600  | -0.22688500 | -9.60283800   | C | 5.89005100  | 1.27546300  | -6.97682900 | H | 4.16141100  | -3.03276200 | 1.64047600   |
| H | 3.03677300  | -5.21646100 | 1.94487800  | H | 4.13481300  | 0.50033700  | -9.54435800   | H | 7.09225900  | -0.22681000 | -5.93883100 | H | 2.42856700  | -2.61850200 | 3.66304400   |
| C | 3.68996000  | -5.55879100 | -0.65905700 | H | 3.47781800  | -2.79721100 | -10.544484500 | H | 6.03231500  | 0.70349500  | -4.88337100 | H | 1.58891600  | -0.22931400 | 2.99197300   |
| H | 4.75253900  | -2.98689700 | -1.38019100 | H | 4.77214300  | -3.47986100 | -9.82834000   | C | 5.89786600  | -1.72855500 | -7.98147000 | C | 6.15195900  | 0.11527700  | -6.05149600  |
| H | 4.76192300  | -1.38795000 | 0.77537500  | H | 3.55629400  | -4.65836800 | -9.40827600   | C | 3.31462000  | 0.80446100  | -8.37482700 | C | 5.93518600  | 0.85546500  | -7.35889900  |
| C | 3.68665700  | -2.76529400 | 2.83817600  | H | 5.19398800  | -1.49060000 | -10.47114000  | H | 4.43489300  | 1.58018600  | -6.96704600 | H | 7.13767600  | -0.33888800 | -5.96744200  |
| H | 2.08944000  | -0.67073000 | 2.55283300  | H | 3.91738700  | -0.93423000 | -11.53907000  | H | 6.47743000  | 2.16204500  | -6.70577100 | H | 5.97604900  | 0.74961300  | -5.18476900  |
| H | 7.91721600  | -2.40817000 | -4.66837900 | H | 2.39711700  | -2.73435000 | -10.73367400  | C | 5.63243800  | -0.48331700 | -8.85904800 | C | 5.82658400  | -2.30425900 | -7.80691500  |
| C | 9.13716100  | -2.58993600 | -6.09111100 | H | 3.89969500  | -3.37791000 | -11.37377600  | C | 6.95807500  | -1.78463200 | -7.70541000 | C | 6.38053700  | 0.09499600  | -8.61579600  |
| C | 9.82594600  | -3.80053600 | -4.78199600 | C | 2.82054400  | -1.94801600 | -7.62056500   | H | 5.66199600  | -2.64469200 | -8.52701800 | H | 4.88329700  | 1.16119500  | -7.43326200  |
| C | 9.95266800  | -1.45761500 | -7.83921300 | C | 2.81748300  | -3.21326600 | -8.09340300   | H | 4.03511500  | 1.60436000  | -0.99657900 | H | 6.52478900  | 1.77745000  | -7.27663000  |
| C | 11.21191100 | -3.89038100 | -4.91892900 | O | 2.04472700  | -4.00058600 | -7.57834400   | H | 6.14911800  | 1.60436000  | -0.99657900 | C | 5.61542400  | -1.20944900 | -8.87512600  |
| C | 11.33580700 | -1.49752500 | -4.91917400 | B | 8.11852700  | -2.25547600 | -5.04628500   | H | 4.50982700  | -0.32781400 | -8.95485600 | H | 6.98308200  | -2.41207700 | -7.57285300  |
| C | 11.97495400 | -2.73214400 | -4.98691200 | C | 9.76227400  | -2.13304600 | -5.18342100   | C | 5.99702500  | -0.71555900 | -9.86613200 | H | 5.48345500  | -3.27917400 | -8.16018000  |
| C | 6.66847400  | -3.78774600 | -4.23211700 | C | 10.60680200 | -3.06493600 | -5.79068100   | C | 11.00276500 | -0.79672800 | -5.83452600 | H | 7.45627700  | -0.11664200 | -8.54756800  |
| C | 6.98796100  | -4.44155200 | -3.03447100 | C | 10.39685500 | -0.94129500 | -4.81706000   | C | 5.07770800  | -1.78220900 | -6.71465000 | H | 6.25172600  | 0.75215100  | -8.94381900  |
| C | 5.51622300  | -4.27675200 | -4.84765500 | C | 11.97388700 | -2.85803000 | -6.98277500   | O | 4.32524100  | -2.73876900 | -6.49128300 | H | 4.54248700  | -1.02076000 | -8.993131600 |
| C | 6.24135000  | -5.47812800 | -2.49796100 | C | 11.75377600 | -0.69054000 | -4.98640700   | C | 9.44739200  | -2.02038900 | -3.08773500 | H | 5.95201100  | -1.63693100 | -8.85275700  |
| C | 4.73427800  | -5.30690700 | -4.32593900 | C | 12.55459200 | -1.66356600 | -5.67272300   | C | 11.05332000 | -2.13840900 | -2.71492500 | O | 5.17774700  | -0.99756600 | -5.81529800  |
| C | 5.08977600  | -5.91005400 | -3.12943300 | C | 7.53693900  | -3.80226600 | -5.22954000   | C | 11.91218300 | -3.18407000 | -3.06421500 | C | 5.13768400  | -2.06464600 | -6.50104700  |
| C | 6.94708400  | -1.36626200 | -3.48891500 | C | 8.06902000  | -4.83624300 | -4.44909600   | C | 11.70120900 | -1.04288800 | -2.13149100 | O | 4.42694900  | -0.31417000 | -6.70374600  |
| C | 5.61127100  | -0.95336400 | -3.48893300 | C | 6.43119800  | -4.18716300 | -5.98552300   | C | 13.28670900 | -3.17053800 | -2.80226900 | B | 9.58633900  | -1.92624100 | -3.08386800  |
| C | 7.65457500  | -0.97693100 | -2.34380200 | C | 7.59073100  | -6.14341400 | -4.44235200   | C | 13.06469700 | -0.98370200 | -1.86798600 | C | 12.11207400 | -1.88782400 | -2.81955700  |
| C | 5.01204700  | -0.20978900 | -2.47980100 | C | 5.91539100  | -5.48173900 | -6.01355300   | C | 13.86972700 | -2.06425300 | -2.21638400 | C | 12.14818100 | -2.76126100 | -3.38668200  |
| C | 7.09556200  | -0.23117200 | -1.30180300 | C | 6.49454200  | -6.47335500 | -5.23436200   | C | 8.75366200  | -3.45938400 | -3.55142700 | C | 11.78802100 | -0.82560100 | -2.11095500  |
| C | 5.76488100  | 0.15433200  | -1.37035000 | C | 7.52771200  | -1.88021900 | -3.53537300   | C | 8.85425000  | -4.57167800 | -2.70573100 | C | 13.52833600 | -2.62771700 | -3.20546400  |
| C | 13.30737000 | -2.80137800 | -5.11886900 | C | 6.14794300  | -1.75258200 | -3.35285300   | C | 7.92501800  | -3.67050600 | -4.65138300 | C | 13.15553300 | -0.65239900 | -1.92657000  |
| F | 12.00516400 | -0.36549400 | -4.98945000 | C | 8.26505100  | -1.79995700 | -2.35023900   | C | 8.20378400  | -5.79482700 | -2.93545100 | C | 14.05834300 | -1.56687700 | -2.99010000  |
| F | 9.39048800  | -0.22828100 | -4.73965300 | C | 5.53751600  | -1.52879200 | -2.12770800   | C | 7.28404100  | -4.87660700 | -4.92893500 | C | 9.03018000  | -3.46001300 | -3.60829700  |
| F | 9.17158600  | -4.98151200 | -4.74453000 | C | 7.69606700  | -1.55476900 | -1.09620400   | C | 7.43031800  | -5.95095800 | -4.06335900 | C | 9.35297000  | -4.56218400 | -2.88399000  |
| F | 11.81281900 | -5.08999000 | -4.99055400 | C | 6.32102900  | -1.41009900 | -0.98794700   | C | 8.48028500  | -1.59525500 | -1.80064000 | C | 8.09831200  | -3.63483400 | -4.61468000  |
| F | 5.06897000  | -3.73612400 | -5.99255900 | F | 13.86588000 | -1.44766500 | -5.75497600   | C | 7.13053500  | -1.29821600 | -2.01127500 | C | 8.83402900  | -5.82715400 | -3.14701700  |
| F | 3.59636700  | -5.68775900 | -4.95958900 | F | 12.29454200 | 0.47583600  | -4.59651800   | C | 8.44897300  | -1.62176900 | -0.45113600 | C | 7.53994300  | -4.87490400 | -4.91361800  |
| F | 4.93595800  | -6.85588300 | -2.57642600 | F | 9.67136200  | 0.05530800  | -4.25920200   | C | 6.22136200  | -0.99891300 | -1.00448800 | C | 7.90838200  | -5.98935600 | -1.74688800  |
| F | 6.58181100  | -0.60266800 | -1.30291900 | F | 10.13589900 | -4.24576500 | -6.24453600   | C | 9.79347100  | -1.31723300 | 0.59631000  | C | 8.64130600  | -1.72728000 | -1.79294700  |
| F | 8.05341800  | -4.03873100 | -2.31732300 | F | 12.73052400 | -3.80262700 | -5.65558400   | C | 6.67651000  | -0.99382900 | 0.31480100  | C | 7.26424300  | -1.53064300 | -7.82672500  |
| F |             |             |             |   |             |             |               |   |             |             |             |   |             |             |              |

Table with columns for category (Hf, C, H, etc.), numerical values, and labels (C, F, H, etc.). The table is divided into sections for '2-Hf-TS2', '2-Hf-P2', and '2-Hf-R3'.

Table with columns for numerical values and labels (C, F, H, etc.). This table continues the data from the first table, showing various numerical values and their corresponding categories.



Table of financial data with columns for stock codes, numerical values, and labels (e.g., H, C, O, HF, F). The table includes a central section labeled '2-HF-P3' and a bottom section labeled '2-HF-TS3'. The data is organized into multiple columns, alternating between labels and numerical values.
